# Supplementary material for: A new class of anionic metallohelicates based on salicylic and terephthalic acid units, accessible in solution and by mechanochemistry
Source: Royal Society of Chemistry journal article supplement (doi:10.1039/d0cc08180a), 2021-01-01
Supplement: d0cc08180a1.pdf [file d0cc08180a1.pdf]

## Supplementary Information

### A new class of anionic metallohelicates based on salicylic and terephthalic acid units, accessible in solution and by mechanochemistry

*Jean-Louis Do,<sup>ab</sup> Hatem M. Titi,<sup>b</sup> Louis A. Cuccia,<sup>a\*</sup> and Tomislav Friščić<sup>b\*</sup>*

*a) Concordia University, Department of Chemistry and Biochemistry, 7141 Sherbrooke St. West, H4B 1R6, Montréal, Québec, Canada*

*b) McGill University, Department of Chemistry, 801 Sherbrooke St., H3A 0B8 Montréal, Québec, Canada*

*\*Email: [louis.cuccia@concordia.ca](mailto:louis.cuccia@concordia.ca), [tomislav.friscic@mcgill.ca](mailto:tomislav.friscic@mcgill.ca)*

# Table of Contents

|                                                                                                      |    |
|------------------------------------------------------------------------------------------------------|----|
| 1. Experimental.....                                                                                 | 3  |
| 1.1 Synthesis of <i>N,N'</i> -bis(3-carboxy-2-hydroxyphenyl)terephthalamide (H <sub>4</sub> L) ..... | 3  |
| 1.2 Solution synthesis of Fe-H1 .....                                                                | 4  |
| 1.3 Solution synthesis of Fe-H2 .....                                                                | 4  |
| 1.4 Solution synthesis of Fe-H3 .....                                                                | 4  |
| 1.5 Solution synthesis of Fe-H4A .....                                                               | 4  |
| 1.6 Solution synthesis of Fe-H4B.....                                                                | 4  |
| 1.7 Solution synthesis of Fe-H4C.....                                                                | 5  |
| 1.8 Solution synthesis of Cu-H1.....                                                                 | 5  |
| 1.9 Solution synthesis of Cu-H2.....                                                                 | 5  |
| 1.10 General procedure for the mechanochemical synthesis of helicates .....                          | 5  |
| 1.11 Mechanochemical synthesis of Fe-H1 .....                                                        | 5  |
| 1.12 Mechanochemical synthesis of Fe-H2.....                                                         | 6  |
| 1.13 Mechanochemical synthesis of Fe-H3.....                                                         | 6  |
| 1.14 Mechanochemical synthesis of Fe-H4A.....                                                        | 6  |
| 1.15 Mechanochemical synthesis of Fe-H4C .....                                                       | 6  |
| 1.16 Mechanochemical synthesis of Cu-H1 .....                                                        | 6  |
| 1.17 Mechanochemical synthesis of Cu-H2 .....                                                        | 6  |
| 2. Summary of IR, <sup>1</sup> H and <sup>13</sup> C NMR and HR-MS Data .....                        | 7  |
| 3. <sup>1</sup> H and <sup>13</sup> C-NMR Spectra.....                                               | 10 |
| 4. Fourier-Transform Attenuated Total Reflectance (FTIR-ATR) Spectra.....                            | 12 |
| 5. Powder X-Ray Diffraction (PXRD) Patterns .....                                                    | 20 |
| 6. HR-MS Spectra.....                                                                                | 26 |
| 7. Single Crystal X-ray Diffraction Data .....                                                       | 40 |
| 8. Thermogravimetric analysis .....                                                                  | 49 |
| 9. References.....                                                                                   | 52 |

## 1. Experimental

Unless otherwise specified, all reagents and solvents were purchased from commercial sources and used without further purification. Solution reactions were carried out in 6 dram borosilicate glass vials using a pre-programmed thermostat oven for any reaction temperatures above room temperature. Solid-state mechanochemical milling reactions were carried out in a Retsch MM200 mill operating at a frequency of 25 Hz using a 5 mL FTS stainless steel milling jar charged with a single stainless-steel ball bearing (7 mm diameter, 0.7 g). PXRD spectra were obtained in the  $2\theta$  range from  $5^\circ$  to  $40^\circ$  using a Bruker D2 PHASER X-Ray Diffractometer equipped with a  $\text{CuK}\alpha$  ( $\lambda = 1.54 \text{ \AA}$ ) source, LinxEye detector, and a Ni filter. FTIR-ATR spectra were obtained in the  $400 \text{ cm}^{-1}$  to  $4000 \text{ cm}^{-1}$  range on a Bruker VERTEX 70/70v FTIR spectrometer equipped with a Platinum ATR module.  $^1\text{H}$  and  $^{13}\text{C}$  NMR spectra were obtained on a Varian MERCURY plus-300 spectrometer (300 MHz) and a Bruker AVIIIHD 500 spectrometer (500 MHz), respectively, with chemical shifts ( $\delta$ ) given in parts per million (ppm). Confirmation of helicate formation was obtained using high-resolution mass spectrometry in negative mode on a Bruker MaXis API QqTOF with multiple charging ESI and direct probing capabilities in the 50-3000  $m/z$  range. Thermogravimetric analysis and differential scanning calorimetry (TGA/DSC) data were measured on a TGA/DSC 1 (Mettler-Toledo, Columbus, Ohio, USA) instrument. All measurements were carried out under a  $25 \text{ mL min}^{-1}$  stream of air, and the samples were heated from RT up to  $700^\circ\text{C}$  using a constant heating ramp of  $10^\circ\text{C min}^{-1}$ .

### 1.1 Synthesis of *N,N'*-bis(3-carboxy-2-hydroxyphenyl)terephthalamide (H4L)

Tetrahydrofuran (THF) and dimethylformamide (DMF) were dried over molecular sieves for a minimum of 12 hours prior to use. In a 100 mL Erlenmeyer flask charged with a magnetic stir bar, 3-aminosalicylic acid (1.50 g, 9.79 mmol) was suspended in THF (50 mL) and placed under magnetic stirring. Solid terephthaloyl chloride (0.663 g, 3.26 mmol) was added to the mixture. Suspended solids rapidly dissolved, resulting in the formation of a dark brown solution and subsequent precipitation of a light pinkish-brown solid over the course of an hour. *N*-methylpyrrolidone (NMP, 10 mL) was added and the reaction mixture was allowed to stir overnight. The mixture was dispersed in a large volume of diethyl ether. The solid was filtered and washed several times with THF, diethyl ether, and methanol. The pinkish crude product was recrystallized from dimethylformamide (DMF), filtered, and washed with methanol to afford the pure product as a beige solid (1.22 g, 2.80 mmol, 86% isolated yield).

Alternatively, a 100 mL Erlenmeyer flask charged with a magnetic stir bar, terephthalic acid (0.543 g, 3.26 mmol), *N*-hydroxysuccinimide (NHS, 0.827 g, 7.18 mmol), and *N*-(3-dimethylaminopropyl)-*N'*-ethylcarbodiimide hydrochloride (EDC, 1.376 g, 7.18 mmol) was evacuated and backfilled with argon. DMF (25 mL) was added by syringe and the reaction mixture was allowed to react at room temperature for 24 hrs under magnetic stirring. THF (25 mL) was added by syringe and 3-aminosalicylic acid (1.50 g, 9.79 mmol) was added under positive argon pressure. Suspended solids rapidly dissolved, resulting in the formation of a dark brown solution and subsequent precipitation of a light pinkish-brown solid over the course of several hours. The reaction mixture was allowed to stir overnight. The mixture was dispersed in a large volume of diethyl ether. The solid was filtered and washed several times with THF, diethyl ether, water, and methanol. The pinkish crude product was recrystallized from dimethylformamide (DMF), filtered, and washed with methanol to afford the pure product as a beige solid (1.01 g, 2.30 mmol, 70% isolated yield).

## 1.2 Solution synthesis of Fe-H1

$\text{Fe}(\text{NO}_3)_3 \cdot 9\text{H}_2\text{O}$  (7.70 mg, 19.0  $\mu\text{mol}$ ) and ligand **H4L** (12.5 mg, 28.5  $\mu\text{mol}$ ) were each dissolved in DMF (1.50 mL). An aqueous solution of NaOH (4M, 30.0  $\mu\text{L}$ ) was added to the solution of the ligand, resulting in a color change from pinkish beige to bright yellow. The ligand solution was then added to the iron salt solution, resulting in formation of a deep red solution. The solution was allowed to sit at room temperature overnight. Formation of **Fe-H1** was confirmed by HRMS and formation of single crystals suitable for XRD studies was achieved by slow diffusion of acetone into the helicate solution (63% isolated yield based on the formula:  $\text{Na}_6\text{Fe}_2\text{L}_3 \cdot 5\text{DMF} \cdot 3\text{Acetone} \cdot 4\text{H}_2\text{O}$ ).

## 1.3 Solution synthesis of Fe-H2

$\text{Fe}(\text{NO}_3)_3 \cdot 9\text{H}_2\text{O}$  (7.70 mg, 19.0  $\mu\text{mol}$ ) and ligand **H4L** (12.5 mg, 28.5  $\mu\text{mol}$ ) were each dissolved or suspended in 2:1 EtOH:H<sub>2</sub>O (1.25 mL). Tetrabutylammonium bromide ( $\text{NEt}_4\text{Br}$ , 36.8 mg, 175  $\mu\text{mol}$ ) was dissolved in DMF (500  $\mu\text{L}$ ) and added to the suspension of the ligand. An aqueous solution of NaOH (4M, 30.0  $\mu\text{L}$ ) was added to the suspension of the ligand, resulting in the immediate dissolution of the solid and formation of a bright yellow solution. The ligand solution was then added to the iron salt solution, resulting in the formation of a deep red solution. The solution was placed in a 120 °C oven overnight, resulting in precipitation of single crystals suitable for XRD studies (16% isolated yield based on the formula:  $\text{Na}_2(\text{NBut}_4)_4\text{Fe}_2\text{L}_3 \cdot \text{DMF}$ ). The formation of **Fe-H2** was confirmed by HRMS.

## 1.4 Solution synthesis of Fe-H3

$\text{Fe}(\text{NO}_3)_3 \cdot 9\text{H}_2\text{O}$  (7.70 mg, 19.0  $\mu\text{mol}$ ) and ligand **H4L** (12.5 mg, 28.5  $\mu\text{mol}$ ) were each dissolved in DMF (1.50 mL). The ligand solution was then added to the iron salt solution, resulting in formation of a deep purple solution. An excess of N,N,N',N'-tetramethylethylenediamine (TMEDA, 100  $\mu\text{L}$ ) was added to the mixture, resulting in the solution going from deep purple to deep red. The solution was placed in a 120°C oven overnight. Formation of **Fe-H3** was confirmed by HRMS and the formation of single crystals suitable for XRD studies was achieved by slow diffusion of isopropanol into the helicate solution (51% isolated yield based on the formula:  $(\text{H}_2\text{TMEDA})_3\text{Fe}_2\text{L}_3 \cdot \text{DMF}$ ).

## 1.5 Solution synthesis of Fe-H4A

$\text{Fe}(\text{NO}_3)_3 \cdot 9\text{H}_2\text{O}$  (7.70 mg, 19.0  $\mu\text{mol}$ ), ligand **H4L** (12.5 mg, 28.5  $\mu\text{mol}$ ) and guanidinium carbonate (15.0 mg, 166  $\mu\text{mol}$ ) were each dissolved or suspended in H<sub>2</sub>O (1 mL). The aqueous base solution was added to the suspension of the ligand, resulting in immediate dissolution of the solid and subsequent formation of a bright yellow suspension. The iron salt solution was then added to the ligand suspension and sonicated for 5 minutes, resulting in the formation of a deep red suspension. The reaction mixture was placed in an 70 °C oven overnight, resulting in precipitation of single crystals suitable for XRD studies (89% isolated yield based on the formula:  $(\text{guanidinium})_6\text{Fe}_2\text{L}_3 \cdot 7\text{H}_2\text{O}$ ). Formation of **Fe-H4** was confirmed by HRMS.

## 1.6 Solution synthesis of Fe-H4B

$\text{Fe}(\text{NO}_3)_3 \cdot 9\text{H}_2\text{O}$  (7.70 mg, 19.0  $\mu\text{mol}$ ), ligand **H4L** (12.5 mg, 28.5  $\mu\text{mol}$ ) and guanidinium carbonate (15.0 mg, 166  $\mu\text{mol}$ ) were each dissolved or suspended in H<sub>2</sub>O (1 mL). The aqueous base solution was added to the suspension of the ligand, resulting in immediate dissolution of the solid and subsequent formation of a bright yellow suspension. The iron salt solution was then added to the ligand suspension and sonicated for 5 minutes, resulting in the formation of a deep red suspension. The reaction mixture was placed in an

85 °C oven overnight, resulting in the precipitation of single crystals suitable for XRD studies (89% isolated yield based on the formula: (guanidinium)<sub>6</sub>Fe<sub>2</sub>L<sub>3</sub>·4H<sub>2</sub>O).

### 1.7 Solution synthesis of Fe-H4C

Fe(NO<sub>3</sub>)<sub>3</sub>·9H<sub>2</sub>O (7.70 mg, 19.0 μmol), ligand **1** (12.5 mg, 28.5 μmol) and guanidinium carbonate (15.0 mg, 166 μmol) were each dissolved or suspended in H<sub>2</sub>O (1 mL). The aqueous base solution was added to the suspension of the ligand, resulting in immediate dissolution of the solid and subsequent formation of a bright yellow suspension. The iron salt solution was then added to the ligand suspension and manually stirred for 15 min, resulting in the formation of a deep red suspension. The reaction mixture was filtered and **Fe-H4C** characterized by PXRD. Upon standing in solution or as a filtered solid, **Fe-H4C** converts to **Fe-H4A** (see Fig. S18).

### 1.8 Solution synthesis of Cu-H1

Cu(OTf)<sub>2</sub> (10.2 mg, 28.5 μmol) and ligand **H4L** (12.5 mg, 28.5 μmol) were each dissolved or suspended in 9:1 *i*PrOH/DMF (1.50 mL). An aqueous solution of NaOH (4M, 30.0 μL) was added to the suspension of the ligand, resulting in immediate dissolution of the solid and formation of a bright yellow solution. The ligand solution was then added to the copper salt solution, resulting in the formation of a deep green solution. The solution was placed in a 120 °C oven overnight, resulting in the precipitation of single crystals suitable for XRD studies (34% isolated yield based on the formula: Na<sub>4</sub>Cu<sub>2</sub>L<sub>2</sub>·3DMF). Formation of **Cu-H1** was confirmed by HRMS.

### 1.9 Solution synthesis of Cu-H2

Cu(OTf)<sub>2</sub> (10.2 mg, 28.5 μmol) and **H4L** (12.5 mg, 28.5 μmol) were each dissolved or suspended in *i*PrOH (1.50 mL). Guanidinium carbonate (15.0 mg, 166 μmol) was dissolved in H<sub>2</sub>O (250 μL). The aqueous base solution was added to the suspension of the ligand, resulting in immediate dissolution of the solid and formation of a bright yellow solution. The ligand solution was then added to the copper salt solution, resulting in formation of a deep green solution and formation of a precipitate within a few minutes. The solution was placed in an 80°C oven overnight, resulting in the appearance of single crystals suitable for single crystal X-ray diffraction studies (93% isolated yield based on the formula: (guanidinium)<sub>4</sub>Cu<sub>2</sub>L<sub>2</sub>·H<sub>2</sub>O·*i*PrOH). Formation of **Cu-H2** was confirmed by HRMS.

### 1.10 General procedure for the mechanochemical synthesis of helicates

All milling procedures were conducted in a 5 mL volume stainless steel milling jar charged with a single stainless steel ball bearing (7 mm diameter, 0.7 g). Materials were loaded into the milling jar and liquid additive was added. The jar was then loaded onto a Retsch MM200 mill operating at a frequency of 25 Hz for 30 min. Liquid additives were chosen based on the solvent initially used to conduct solution reactions or from which the helicates were crystallized.

### 1.11 Mechanochemical synthesis of Fe-H1

Fe(NO<sub>3</sub>)<sub>3</sub>·9H<sub>2</sub>O (31.0 mg, 76.0 μmol), ligand **H4L** (50.0 mg, 114 μmol), and Na<sub>2</sub>CO<sub>3</sub> (50.0 mg, 471 μmol) were loaded into the milling jar. DMF (50 μL,  $\eta$  = 0.38 μL/mg) was added as a liquid additive and the reaction mixture was milled for 30 min. Formation of **Fe-H1** was confirmed by HRMS and PXRD.

### 1.12 Mechanochemical synthesis of Fe-H2

Fe(NO<sub>3</sub>)<sub>3</sub>·9H<sub>2</sub>O (20.7 mg, 50.7 μmol), ligand **H4L** (33.3 mg, 76.0 μmol), Na<sub>2</sub>CO<sub>3</sub> (33.3 mg, 314 μmol), and (NEt<sub>4</sub>Br, 61.7 mg, 293 μmol) were loaded into the milling jar. DMF (56 μL,  $\eta$  = 0.38 μL/mg) was added as a liquid additive and the reaction mixture was milled for 30 min. Formation of **Fe-H2** was confirmed by HRMS and PXRD.

### 1.13 Mechanochemical synthesis of Fe-H3

Fe(NO<sub>3</sub>)<sub>3</sub>·9H<sub>2</sub>O (46.5 mg, 114 μmol), ligand **H4L** (75.0 mg, 171 μmol), and TMEDA (51 μL, 342 μmol) were loaded into the milling jar. DMF (70.0 μL,  $\eta$  = 0.38 μL/mg) was added as a liquid additive and the reaction mixture was milled for 30 min. Formation of **Fe-H3** was confirmed by HRMS and PXRD.

### 1.14 Mechanochemical synthesis of Fe-H4A

Fe(NO<sub>3</sub>)<sub>3</sub>·9H<sub>2</sub>O (31.0 mg, 76.0 μmol), ligand **H4L** (50.0 mg, 114 μmol), and guanidinium carbonate (41.0 mg, 456 μmol) were loaded into the milling jar. MeNO<sub>2</sub> or MeCN (61 μL,  $\eta$  = 0.50 μL/mg) was added as a liquid additive and the reaction mixture was milled for 30 min. Formation of **Fe-H4** was confirmed by HRMS and PXRD.

### 1.15 Mechanochemical synthesis of Fe-H4C

Fe(NO<sub>3</sub>)<sub>3</sub>·9H<sub>2</sub>O (31.0 mg, 76.0 μmol), ligand **H4L** (50.0 mg, 114 μmol), and guanidinium carbonate (41.0 mg, 456 μmol) were loaded into the milling jar. H<sub>2</sub>O (45 μL,  $\eta$  = 0.38 μL/mg) was added as a liquid additive and the reaction mixture was milled for 30 min. Formation of **Fe-H4C** was confirmed by PXRD.

### 1.16 Mechanochemical synthesis of Cu-H1

Cu(OTf)<sub>2</sub> (41.0 mg, 114 μmol), ligand **H4L** (50.0 mg, μmol), and Na<sub>2</sub>CO<sub>3</sub> (50.0 mg, 431 μmol) were loaded into the milling jar. DMF (50 μL,  $\eta$  = 0.35 μL/mg) was added as a liquid additive and the reaction mixture was milled for 30 min. Formation of **Cu-H1** was confirmed by HRMS.

### 1.17 Mechanochemical synthesis of Cu-H2

Cu(OTf)<sub>2</sub> (41.0 mg, 114 μmol), ligand **H4L** (50.0 mg, μmol), and guanidinium carbonate (30.0 mg, 333 μmol) were loaded into the milling jar. An optimized mixture of 9:1 *i*PrOH/H<sub>2</sub>O (50 μL,  $\eta$  = 0.41 μL/mg) was added as a liquid additive and the reaction mixture was milled for 30 min. Formation of **Cu-H2** was confirmed by HRMS and PXRD. For the synthesis of **Cu-H2** from CuO, CuO (20.0 mg, 250 μmol), ligand **1** (110.0 mg, 250 μmol), and NH<sub>4</sub>OAc (2.0 mg, 25 μmol, 10 mol %) were loaded into the milling jar and the reaction mixture was milled for 90 min. Guanidinium carbonate (55.0 mg, 611 μmol) and a mixture of 9:1 *i*PrOH/H<sub>2</sub>O (75 μL,  $\eta$  = 0.42 μL/mg) was added as a liquid additive and the reaction mixture was milled. Formation of **Cu-H2** was confirmed by HRMS and PXRD.

## 2. Summary of IR, $^1\text{H}$ and $^{13}\text{C}$ NMR and HR-MS Data

### *N,N'*-bis(3-carboxy-2-hydroxyphenyl)terephthalamide (H<sub>4</sub>L)

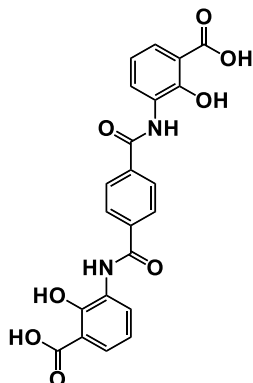

Beige to pinkish-brown solid (86% yield); **IR** ( $\nu$ ,  $\text{cm}^{-1}$ ) 557, 627, 654, 721, 755, 843, 859, 895, 1079, 1123, 1185, 1245, 1314, 1339, 1435, 1460, 1505, 1538, 1612, 1643, 3314, 2600-3200 (broad)  **$^1\text{H}$ -NMR** (300 MHz,  $\text{DMSO}-d_6$ )  $\delta$  6.90-7.00 (t,  $J = 8$  Hz, 2H),  $\delta$  7.64-7.73 (dd,  $J = 8, 1.6$  Hz, 2H),  $\delta$  7.86-7.97 (dd,  $J = 8, 1.5$  Hz, 2H),  $\delta$  8.10 (s, 4H),  $\delta$  9.82 (s, 2H)  **$^{13}\text{C}$ -NMR** (500 MHz,  $\text{DMSO}-d_6$ )  $\delta$  113.65,  $\delta$  118.91,  $\delta$  126.76,  $\delta$  127.33,  $\delta$  128.24,  $\delta$  131.48,  $\delta$  137.34,  $\delta$  155.13,  $\delta$  165.08,  $\delta$  172.66 **HR-MS**: calculated for  $\text{C}_{22}\text{H}_{16}\text{N}_2\text{O}_8$  [M]: 436.09; measured  $m/z$   $\text{C}_{22}\text{H}_{16}\text{N}_2\text{O}_8$  [M – H]: 435.08

### Fe-H1

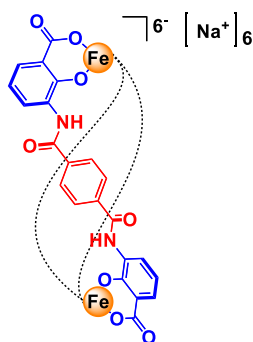

Bright red solid and dark red crystals; **IR** ( $\nu$ ,  $\text{cm}^{-1}$ ) 585, 661, 758, 867, 1063, 1102, 1229, 1254, 1354, 1389, 1432, 1496, 1524, 1647, 3046-3720

| HR-MS for Fe-H1                                                               |                  |                              |                                |
|-------------------------------------------------------------------------------|------------------|------------------------------|--------------------------------|
| Formula                                                                       | Calculated $m/z$ | Measured $m/z$<br>(solution) | Measure $m/z$<br>(solid-state) |
| $\text{C}_{66}\text{H}_{36}\text{Fe}_2\text{N}_6\text{O}_{24}\text{Na}_6$ [M] | 1545.99          | -                            | -                              |
| $\text{C}_{66}\text{H}_{40}\text{Fe}_2\text{N}_6\text{O}_{24}$ [M – 6Na + 4H] | 706.04           | 706.04                       | -                              |
| $\text{C}_{66}\text{H}_{38}\text{Fe}_2\text{N}_6\text{O}_{24}$ [M – 6Na + 2H] | 352.52           | -                            | 352.52                         |

## Fe-H2

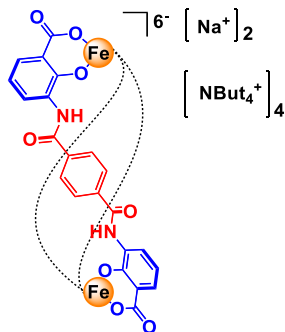

Bright red solid and dark red crystals; **IR** ( $\nu$ ,  $\text{cm}^{-1}$ ) 558, 590, 638, 714, 731, 751, 795, 841, 860, 892, 940, 1068, 1128, 1190, 1284, 1349, 1392, 1435, 1485, 1503, 1539, 1602, 1632, 1658, 3397

| HR-MS for Fe-H2                                                                                     |                |                         |                           |
|-----------------------------------------------------------------------------------------------------|----------------|-------------------------|---------------------------|
| Formula                                                                                             | Calculated m/z | Measured m/z (solution) | Measure m/z (solid-state) |
| $\text{C}_{130}\text{H}_{180}\text{Fe}_2\text{N}_{10}\text{O}_{24}\text{Na}_2$ [M]                  | 2423.17        | -                       | -                         |
| $\text{C}_{130}\text{H}_{180}\text{Fe}_2\text{N}_{10}\text{O}_{24}$ [M - 2Na]                       | 1188.60        | 1189.10                 | -                         |
| $\text{C}_{114}\text{H}_{144}\text{Fe}_2\text{N}_9\text{O}_{24}$ [M - 2Na - NBut <sub>4</sub> ]     | 711.63         | 711.97                  | -                         |
| $\text{C}_{114}\text{H}_{145}\text{Fe}_2\text{N}_9\text{O}_{24}$ [M - 2Na - NBut <sub>4</sub> + 1H] | 1067.96        | 1068.46                 | -                         |
| $\text{C}_{66}\text{H}_{38}\text{Fe}_2\text{N}_6\text{O}_{24}$ [M - 2Na - 4NBut <sub>4</sub> + 2H]  | 352.52         | -                       | 352.52                    |

## Fe-H3

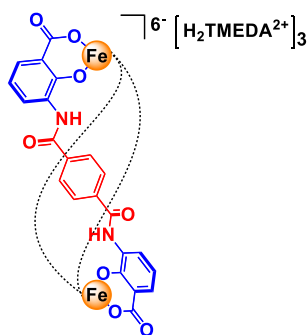

Bright red solid and dark red crystals; **IR** ( $\nu$ ,  $\text{cm}^{-1}$ ) 507, 581, 659, 758, 816, 860, 893, 953, 1090, 1162, 1191, 1226, 1254, 1349, 1386, 1428, 1471, 1490, 1520, 1602, 1652, 2969, 3140-3670 (broad)

| HR-MS for Fe-H3                                                                  |                |                         |                           |
|----------------------------------------------------------------------------------|----------------|-------------------------|---------------------------|
| Formula                                                                          | Calculated m/z | Measured m/z (solution) | Measure m/z (solid-state) |
| $\text{C}_{84}\text{H}_{90}\text{Fe}_2\text{N}_{12}\text{O}_{24}$ [M]            | 1762.49        | -                       | -                         |
| $\text{C}_{66}\text{H}_{40}\text{Fe}_2\text{N}_6\text{O}_{24}$ [M - 3TMEDA + 4H] | 706.04         | 706.04                  | 706.04                    |

## Fe-H4

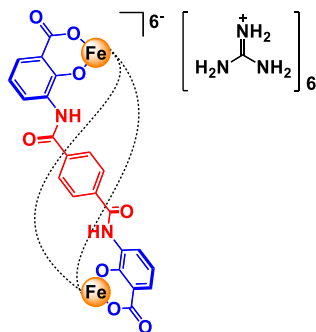

Bright red solid and dark red crystals; **IR** ( $\nu$ ,  $\text{cm}^{-1}$ ) **Fe-H4A** 583, 641, 722, 761, 812, 860, 893, 949, 1017, 1081, 1155, 1191, 1233, 1343, 1426, 1468, 1515, 1600, 1645, 2874-3707 (broad) **Fe-H4B** 553, 584, 639, 661, 722, 760, 803, 862, 892, 950, 1013, 1075, 1150, 1194, 1235, 1342, 1424, 1467, 1496, 1515, 1600, 1649, 2887-3220 (broad), 3220-3497 (broad)

| HR-MS for Fe-H4                                                                |                |                            |                              |
|--------------------------------------------------------------------------------|----------------|----------------------------|------------------------------|
| Formula                                                                        | Calculated m/z | Measured m/z<br>(solution) | Measure m/z<br>(solid-state) |
| $\text{C}_{72}\text{H}_{72}\text{Fe}_2\text{N}_{24}\text{O}_{24}$ [M]          | 1769.14        | -                          | -                            |
| $\text{C}_{67}\text{H}_{44}\text{Fe}_2\text{N}_9\text{O}_{24}$ [M – 5Gua + 2H] | 490.04         | 488.00                     | -                            |
| $\text{C}_{66}\text{H}_{38}\text{Fe}_2\text{N}_6\text{O}_{24}$ [M – 6Gua + 2H] | 352.52         | 352.52                     | 353.20                       |
| $\text{C}_{66}\text{H}_{40}\text{Fe}_2\text{N}_6\text{O}_{24}$ [M – 6Gua + 4H] | 706.04         | -                          | 706.04                       |

## Cu-H1

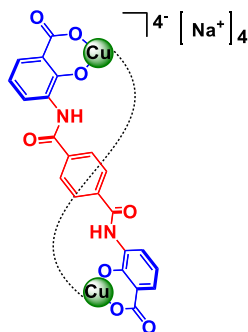

Dark green solid and dark green crystals; **IR** ( $\nu$ ,  $\text{cm}^{-1}$ ) 517, 584, 639, 660, 707, 757, 865, 895, 953, 1032, 1063, 1096, 1156, 1225, 1255, 1353, 1388, 1412, 1436, 1495, 1652, 2831-2900 (broad), 2900-3037 (broad), 3108-3690 (broad)

| HR-MS for Cu-H1                                                                     |                |                            |                              |
|-------------------------------------------------------------------------------------|----------------|----------------------------|------------------------------|
| Formula                                                                             | Calculated m/z | Measured m/z<br>(solution) | Measure m/z<br>(solid-state) |
| $\text{C}_{44}\text{H}_{24}\text{Cu}_2\text{N}_4\text{O}_{16}\text{Na}_4$ [M]       | 1081.94        | -                          | -                            |
| $\text{C}_{44}\text{H}_{24}\text{Cu}_2\text{N}_4\text{O}_{16}\text{Na}_2$ [M – 2Na] | 517.98         | 517.98                     | 517.98                       |
| $\text{C}_{44}\text{H}_{24}\text{Cu}_2\text{N}_4\text{O}_{16}\text{Na}_1$ [M – 3Na] | 337.66         | -                          | 338.32                       |

## Cu-H2

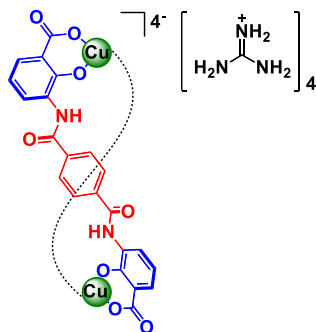

Dark green solid and dark green crystals; **IR** ( $\nu$ ,  $\text{cm}^{-1}$ ) 581, 635, 680, 747, 816, 861, 896, 955, 1008, 1072, 1155, 1186, 1256, 1349, 1398, 1428, 1468, 1495, 1520, 1601, 1652, 2870-3242 (broad), 3242-3515 (broad)

| HR-MS for Cu-H1                                                                 |                |                         |                                     |
|---------------------------------------------------------------------------------|----------------|-------------------------|-------------------------------------|
| Formula                                                                         | Calculated m/z | Measured m/z (solution) | Measure m/z (solid-state)           |
| $\text{C}_{48}\text{H}_{48}\text{Cu}_2\text{N}_{16}\text{O}_{16}$ [M]           | 1230.20        | -                       | -                                   |
| $\text{C}_{44}\text{H}_{26}\text{Cu}_2\text{N}_4\text{O}_{16}$ [M – 4 Gua + 2H] | 496.00         | 496.00                  | 496.00 (triflate)<br>496.00 (oxide) |

### 3. $^1\text{H}$ and $^{13}\text{C}$ -NMR Spectra

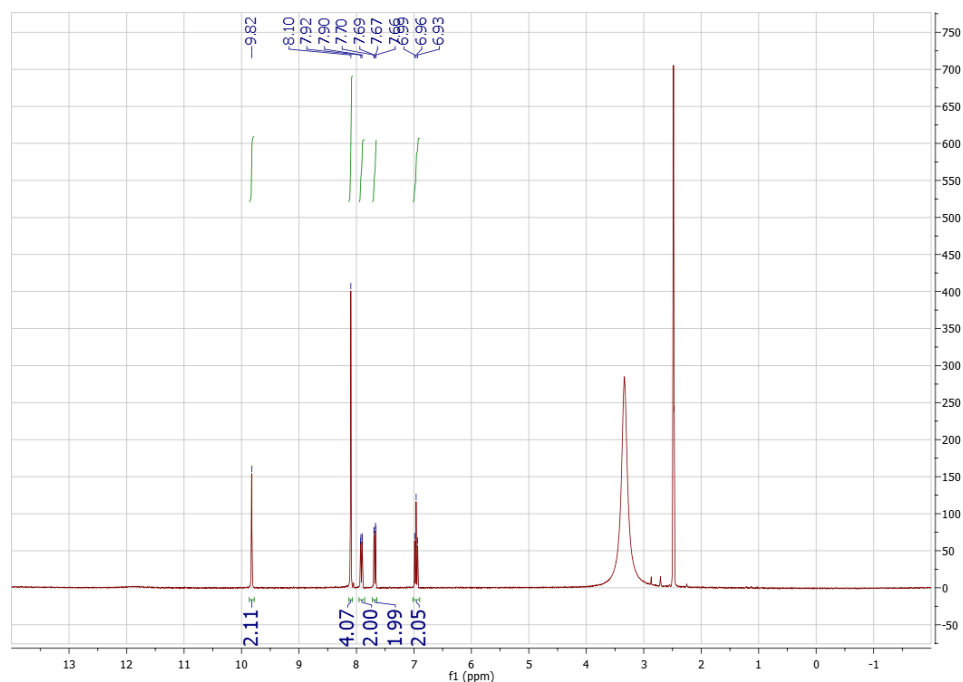

**Figure S1.**  $^1\text{H}$ -NMR spectrum of **H4L** made from terephthaloyl chloride

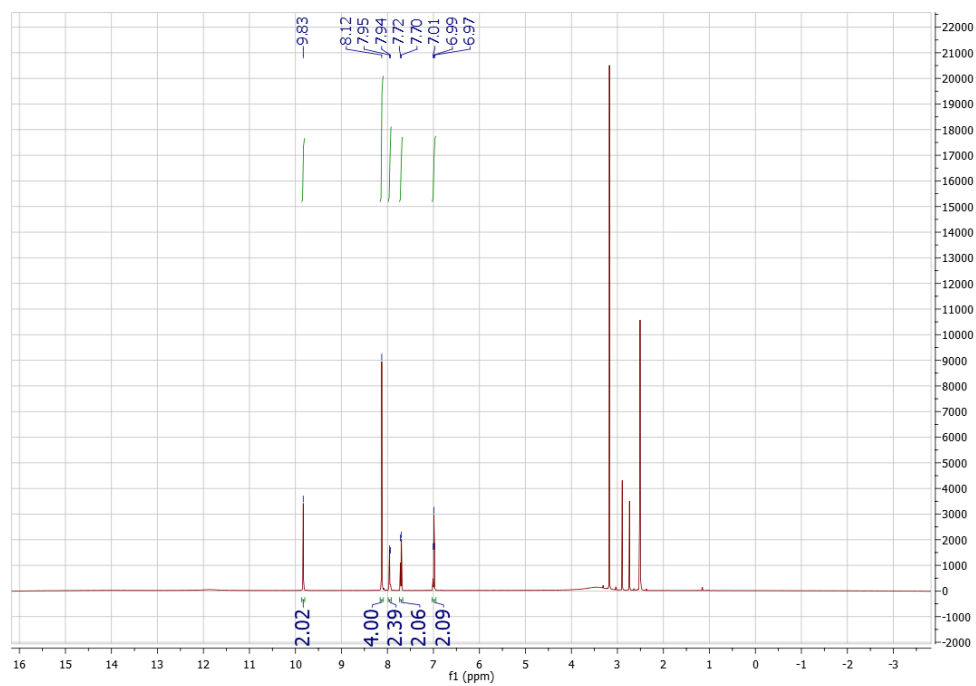

**Figure S2.** <sup>1</sup>H-NMR spectrum of H<sub>4</sub>L made from terephthalic acid

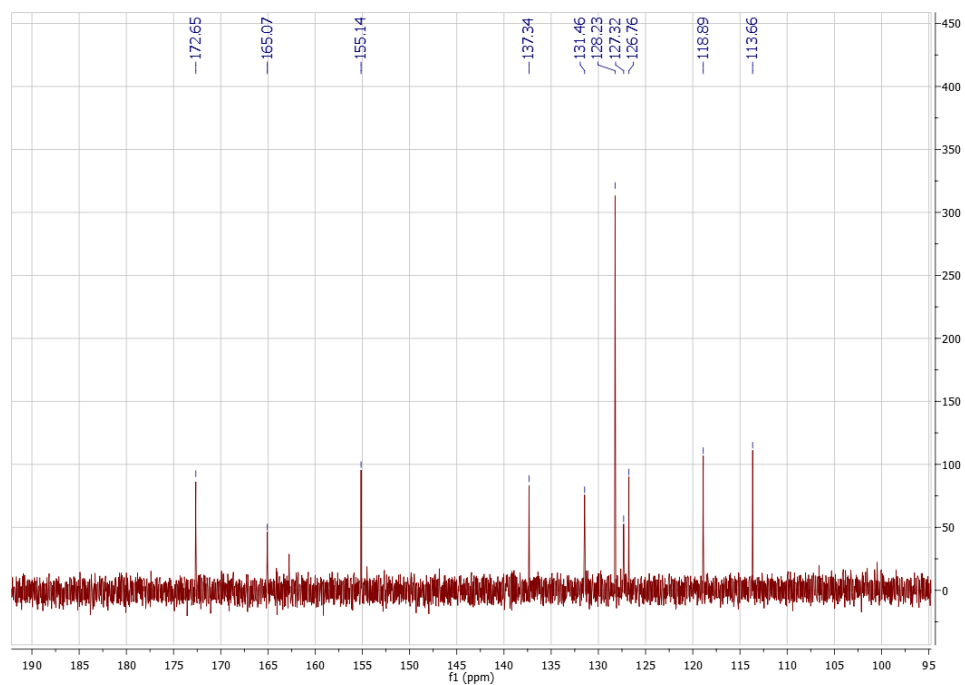

**Figure S3.** <sup>13</sup>C-NMR spectrum of H<sub>4</sub>L made from terephthaloyl chloride

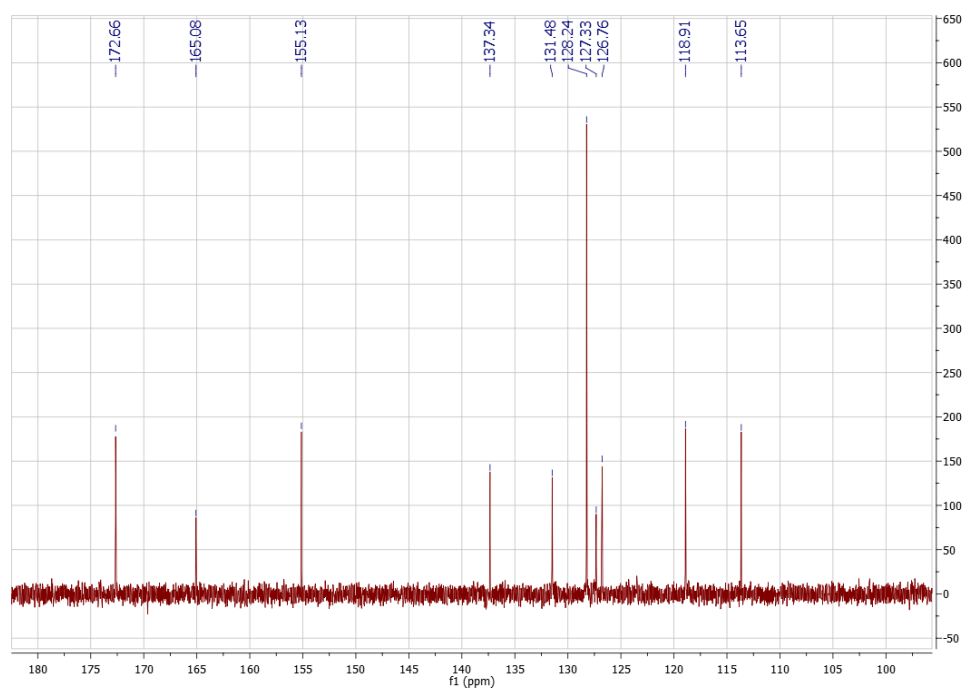

**Figure S4.**  $^{13}\text{C}$ -NMR spectrum of **H<sub>4</sub>L** made from terephthalic acid

#### 4. Fourier-Transform Attenuated Total Reflectance (FTIR-ATR) Spectra

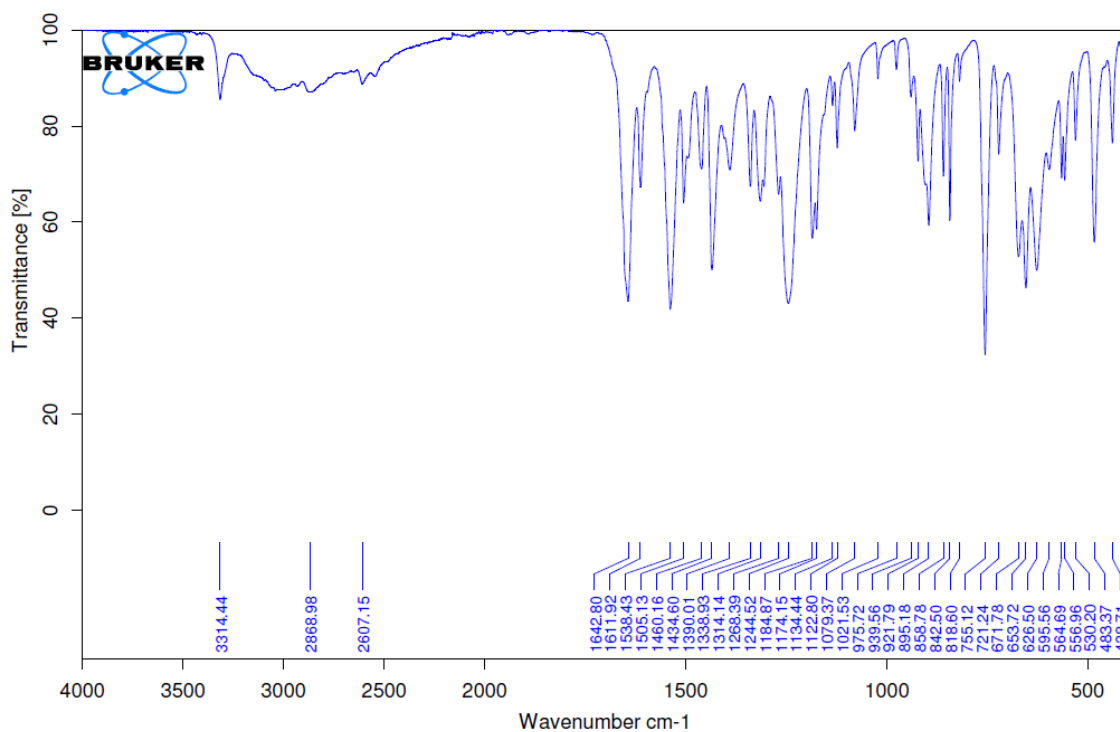

**Figure S5.** FTIR-ATR spectrum of **H<sub>4</sub>L**.

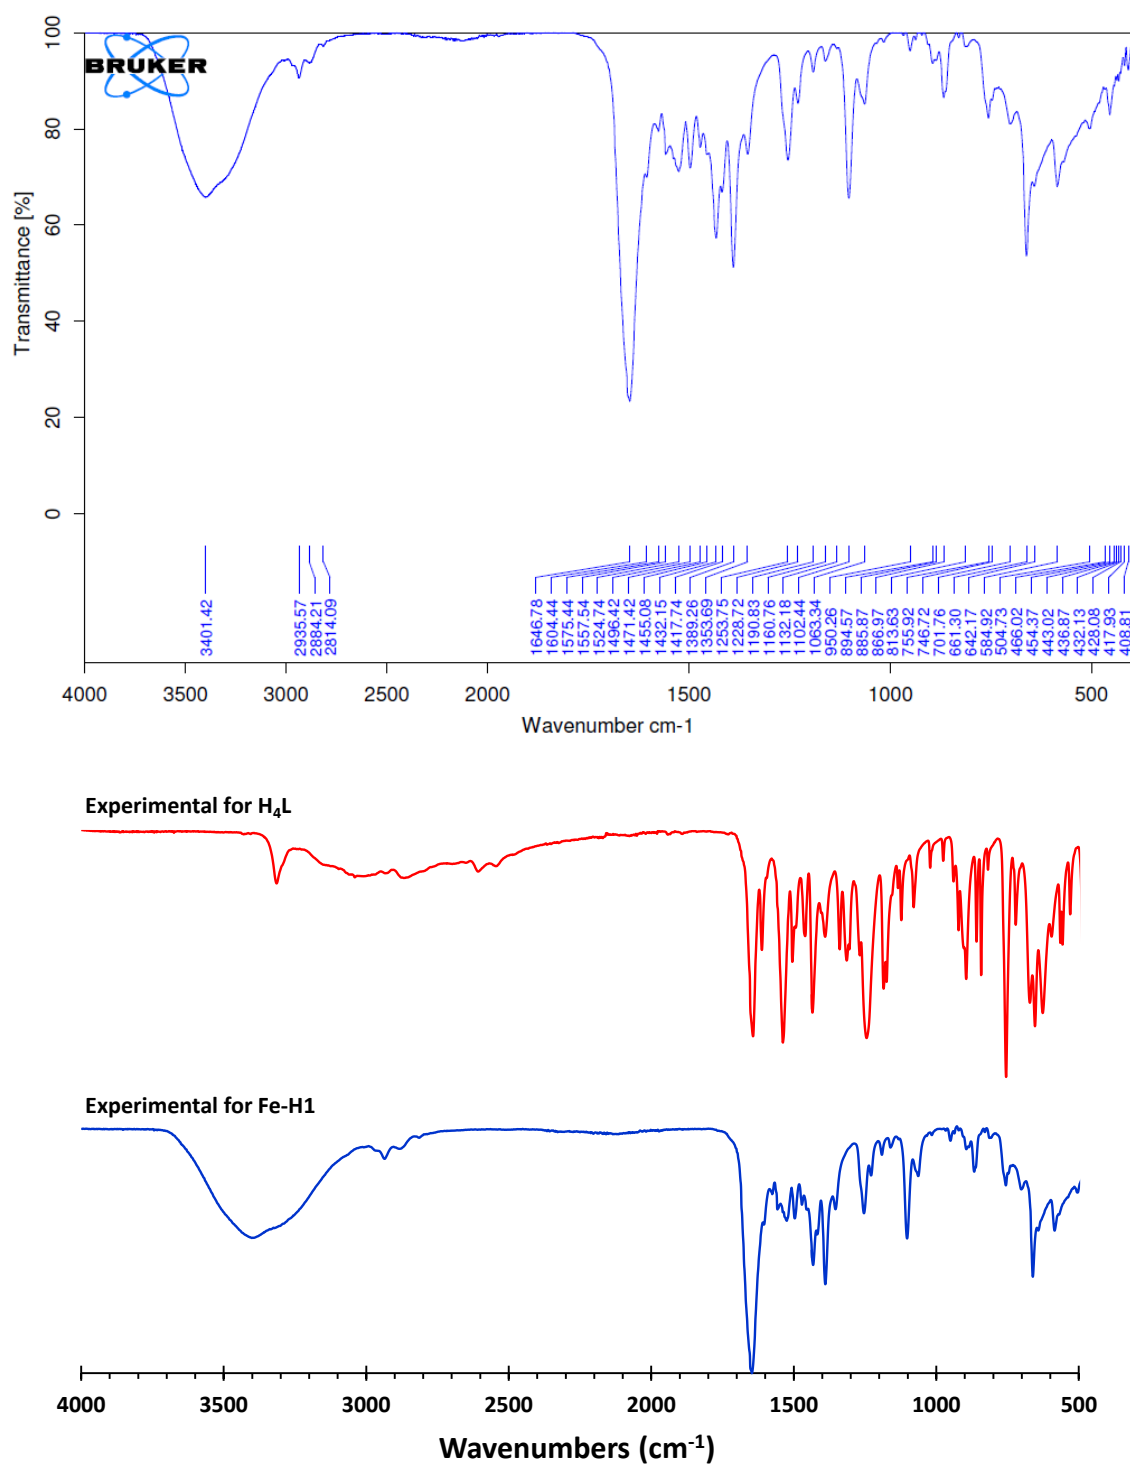

**Figure S6.** FTIR-ATR spectra of **Fe-H1** (top) and stacked for comparison with ligand (bottom)

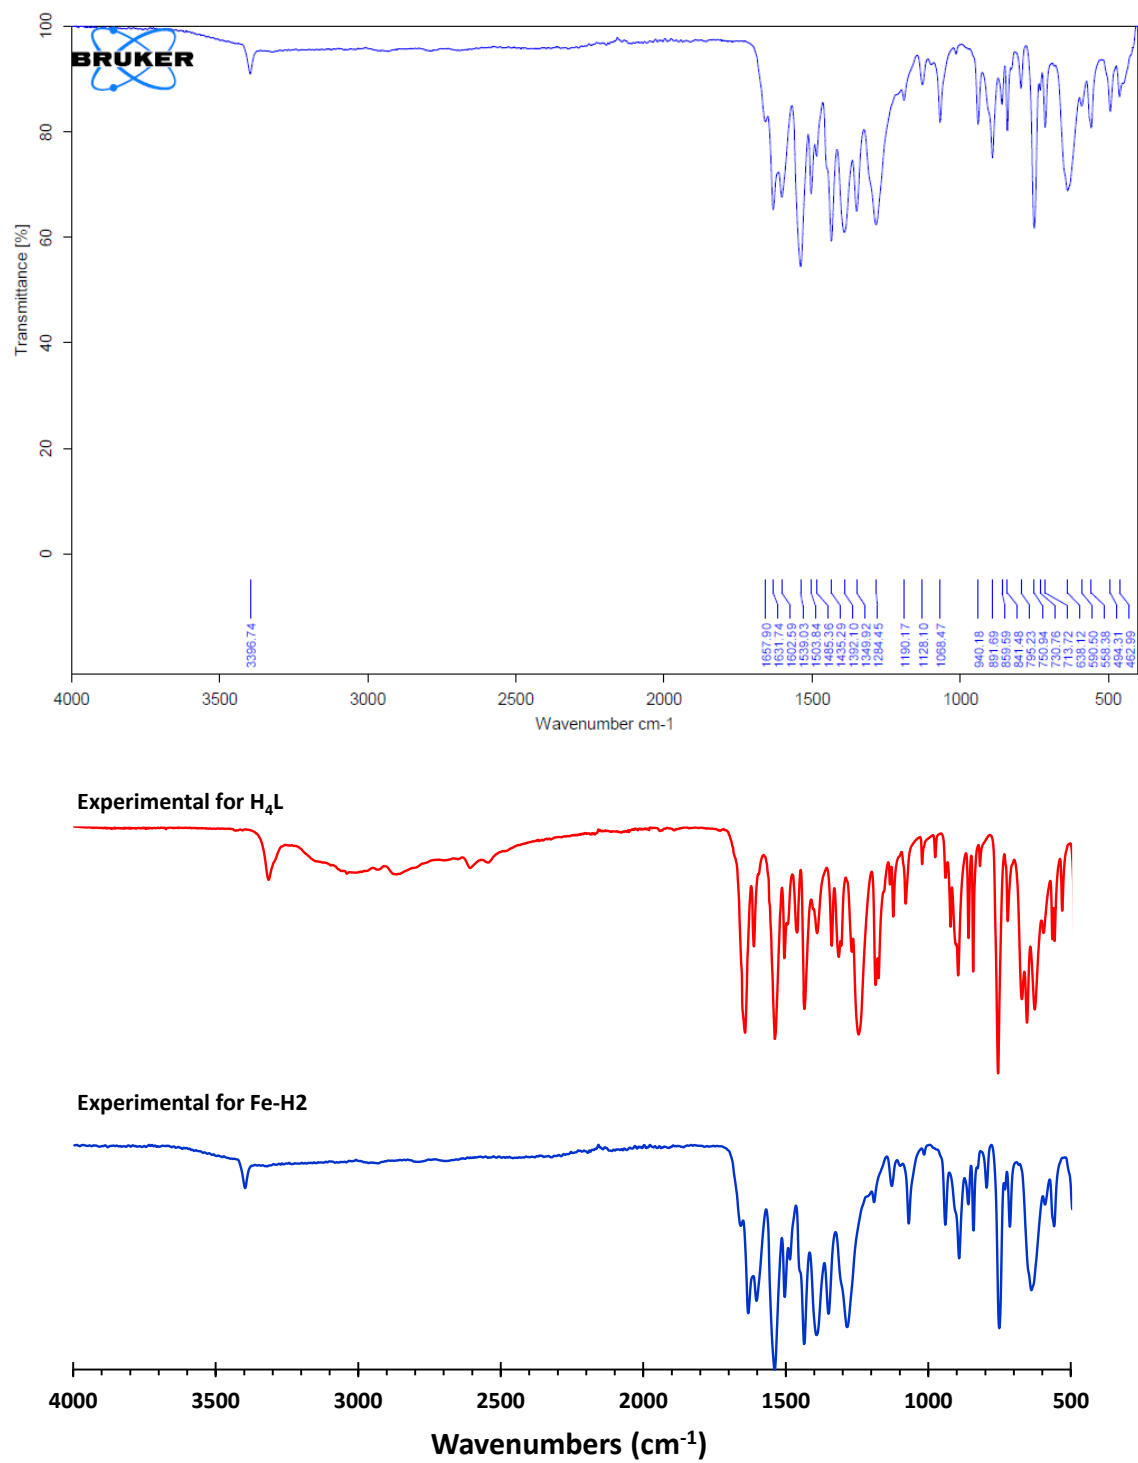

**Figure S7.** FTIR-ATR spectrum of **Fe-H2** and stacked for comparison with ligand (bottom)

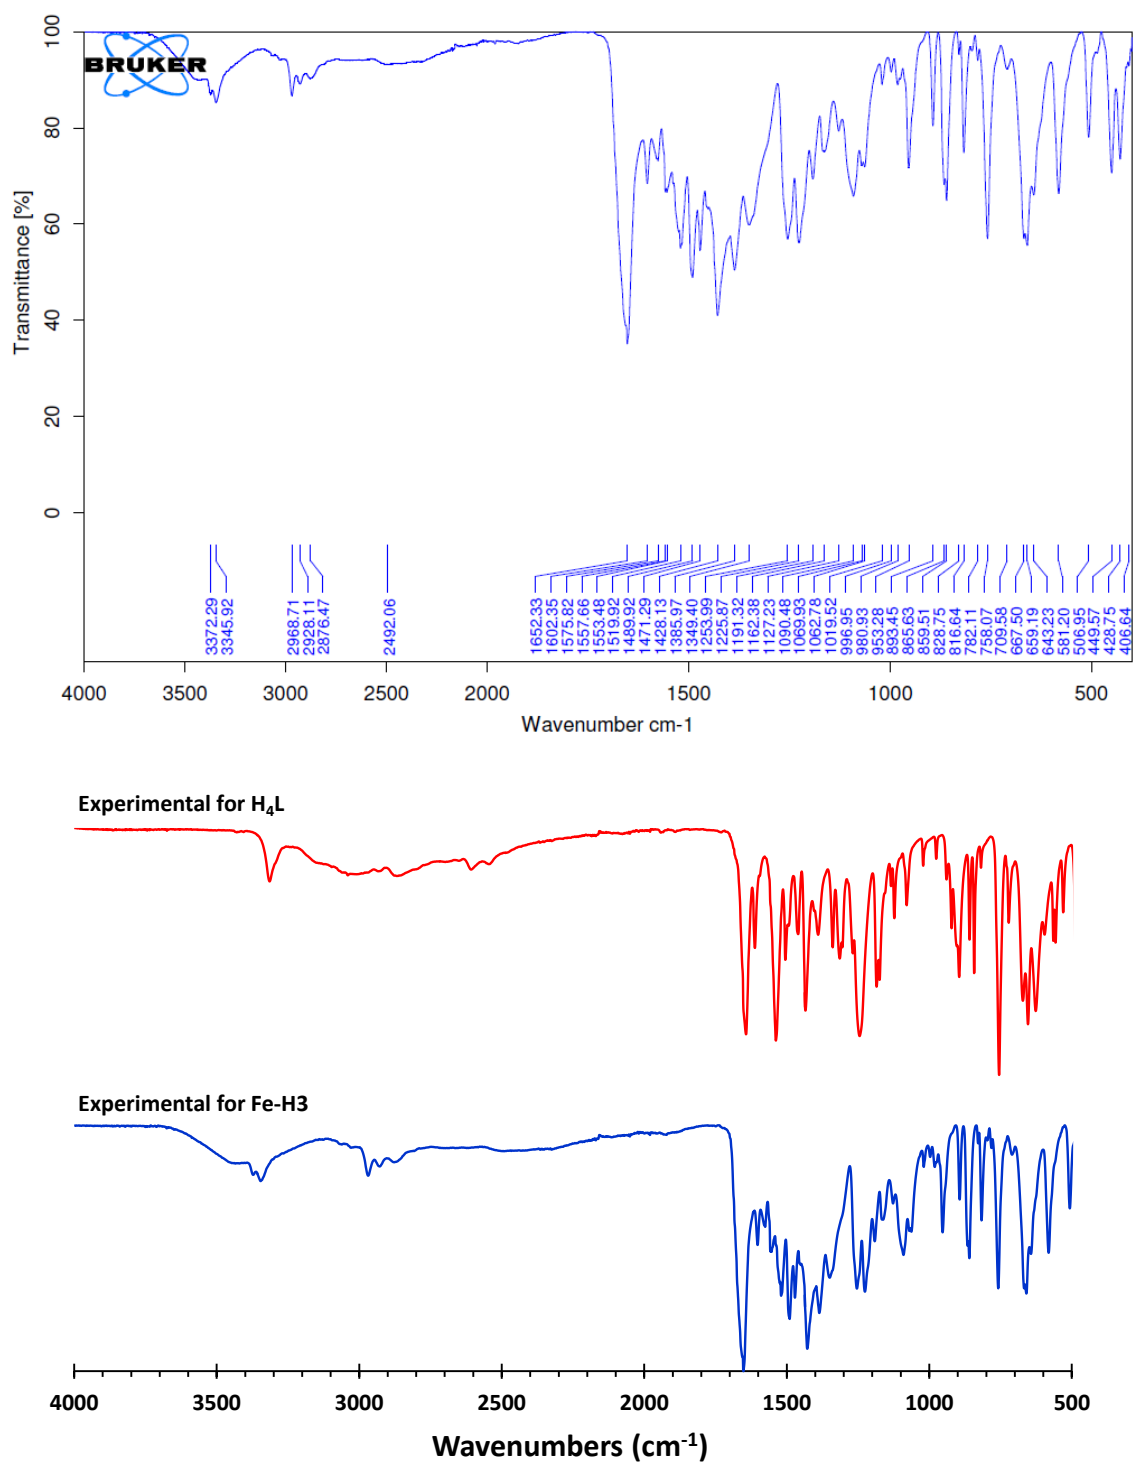

**Figure S8.** FTIR-ATR spectrum of **Fe-H3** and stacked for comparison with ligand (bottom)

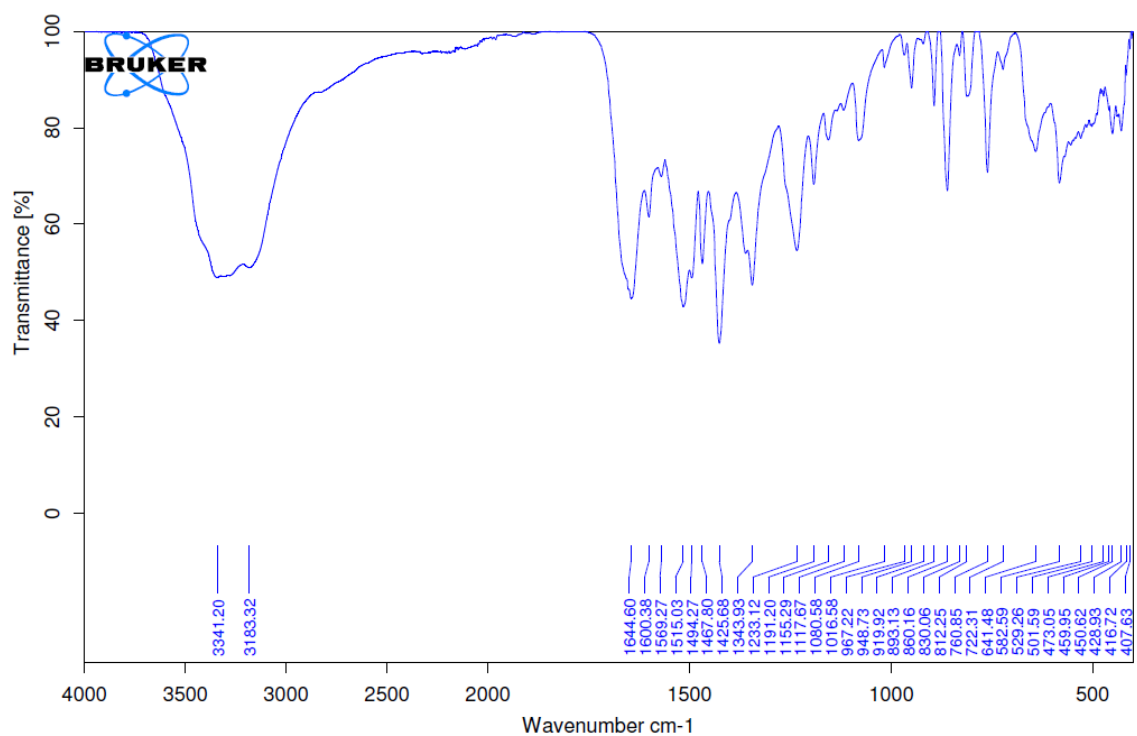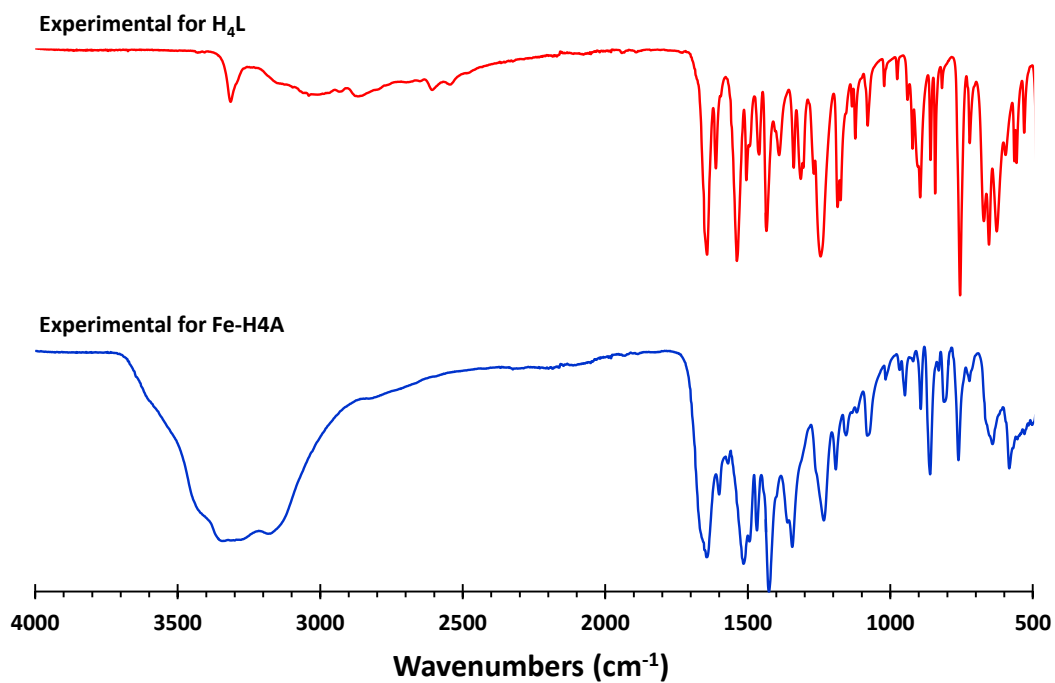

**Figure S9.** FTIR-ATR spectrum of **Fe-H4A** and stacked for comparison with ligand (bottom)

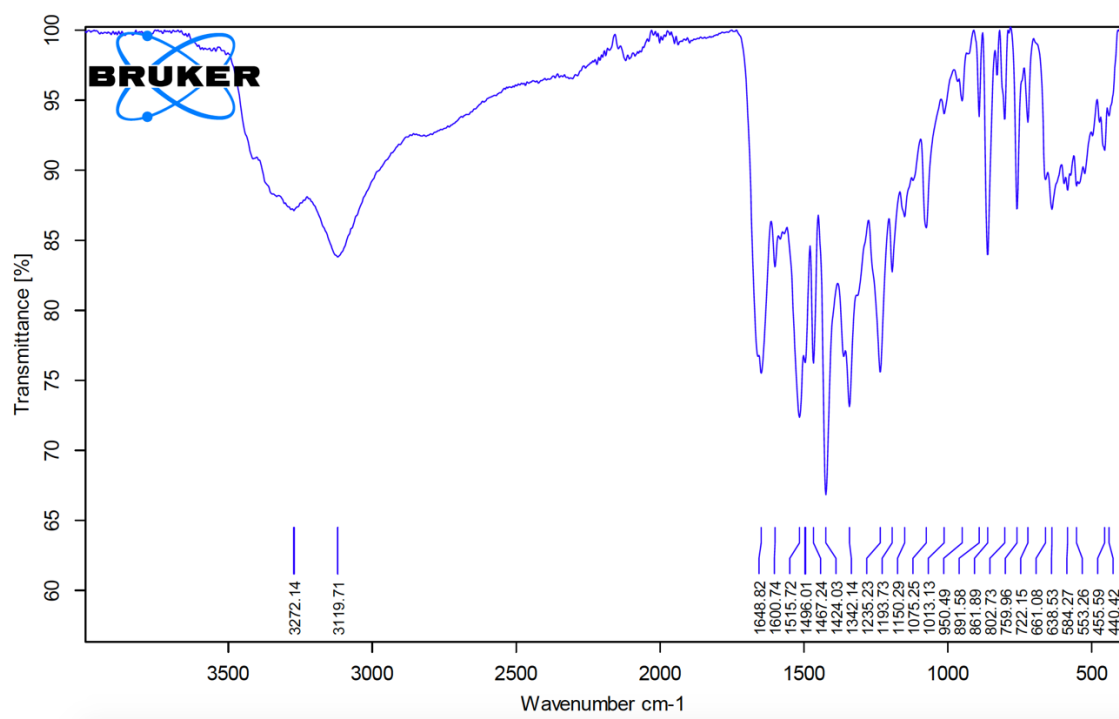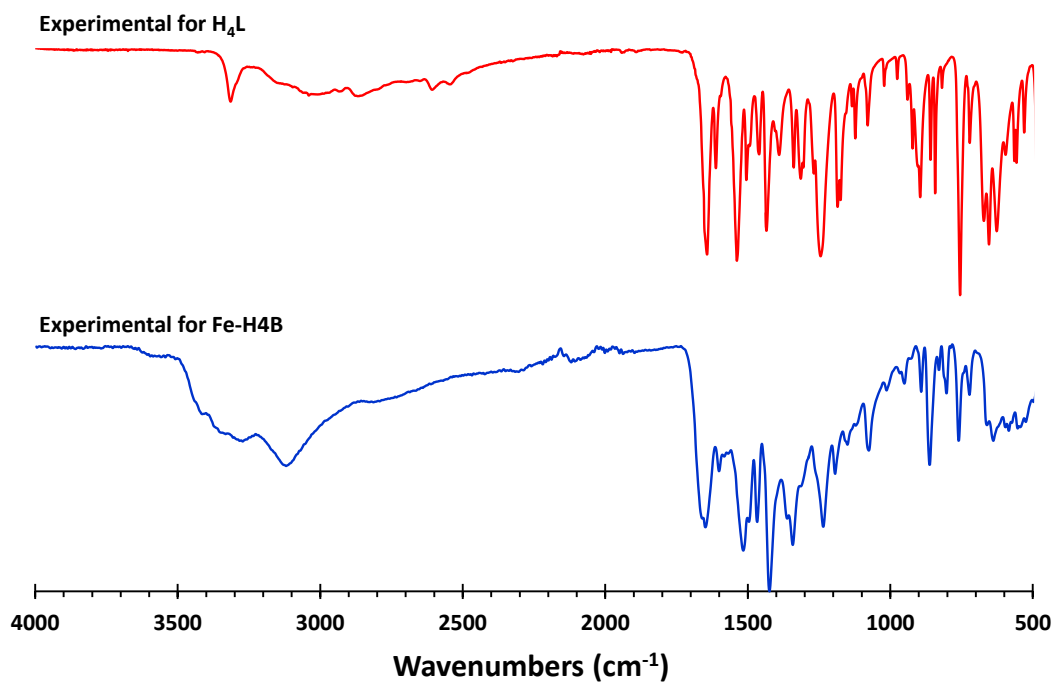

**Figure S10.** FTIR-ATR spectrum of **Fe-H4B** and stacked for comparison with ligand (bottom)

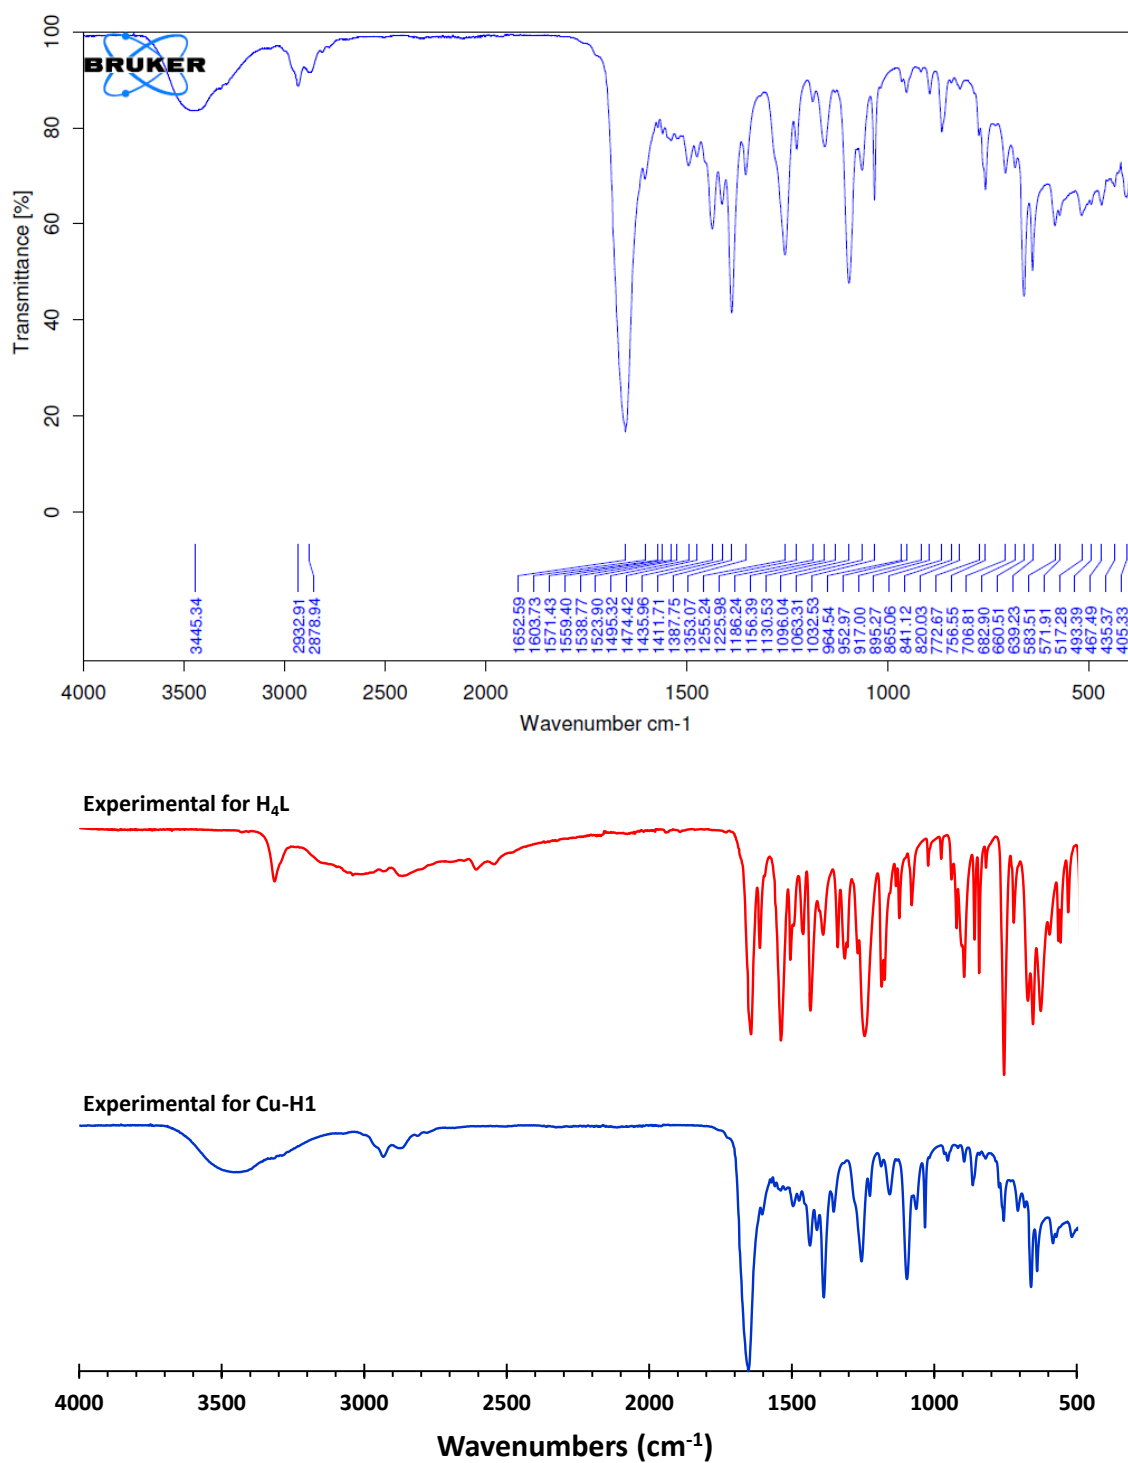

**Figure S11.** FTIR-ATR spectrum of **Cu-H1** and stacked for comparison with ligand (bottom)

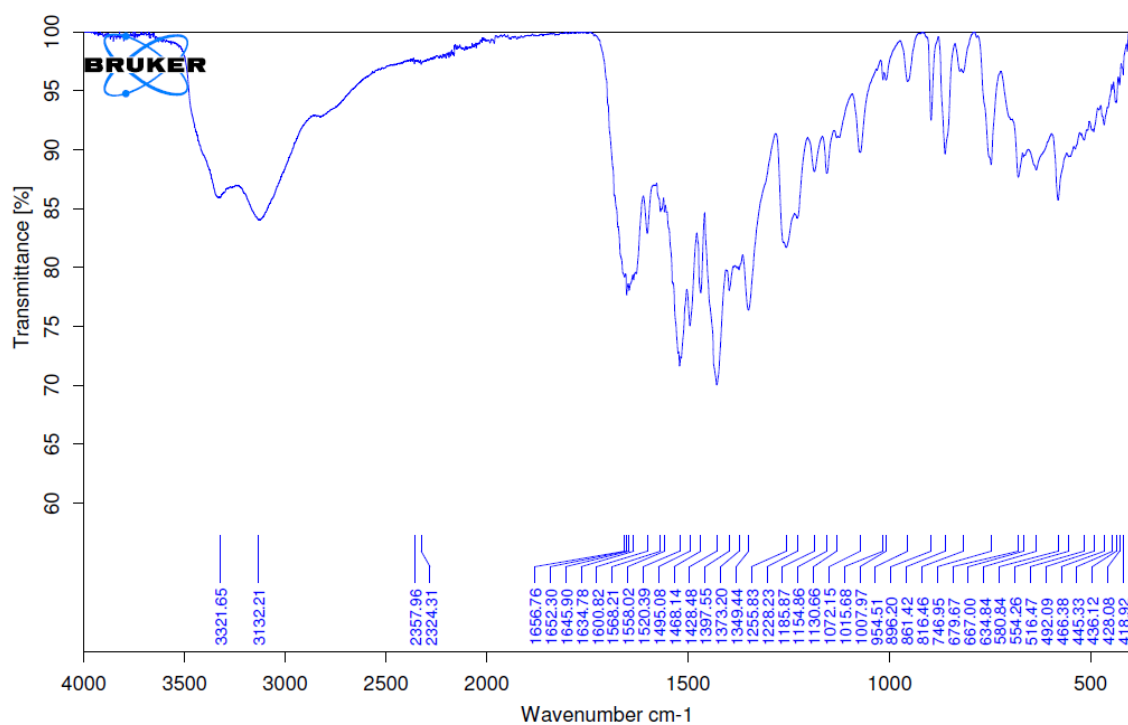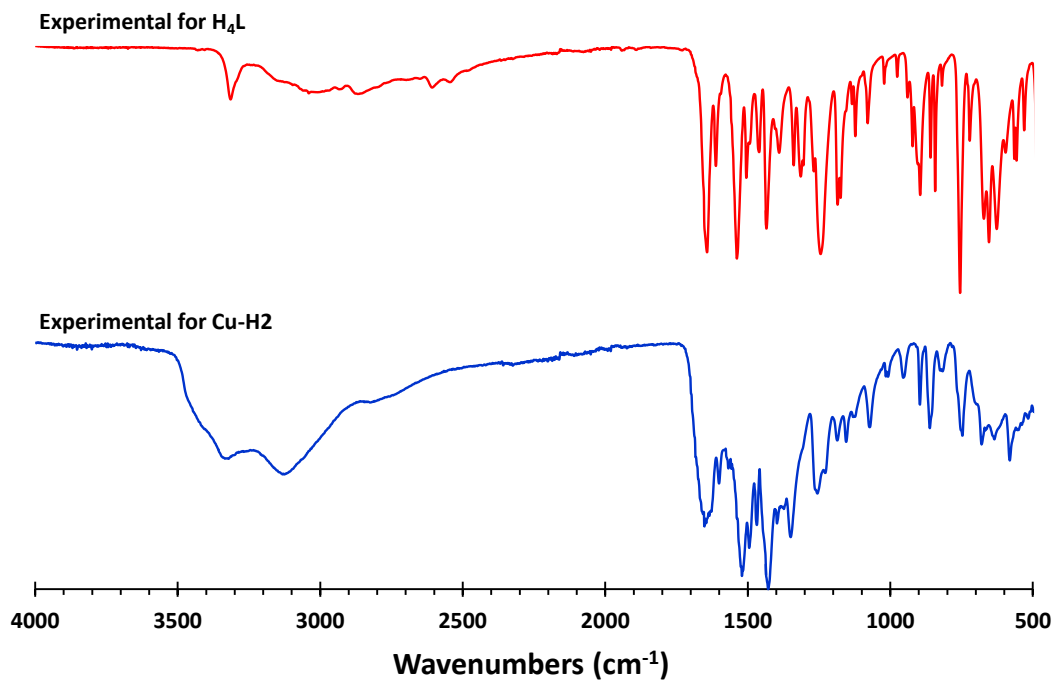

**Figure S12.** FTIR-ATR spectrum of **Cu-H2** and stacked for comparison with ligand (bottom)

## 5. Powder X-Ray Diffraction (PXRD) Patterns

Simulated PXRD patterns from single crystal data are shown as red colored patterns. The PXRD patterns of materials obtained from solution are shown in black, orange, and gold. The PXRD patterns of mechanochemically obtained materials are shown in blue, green, and purple.

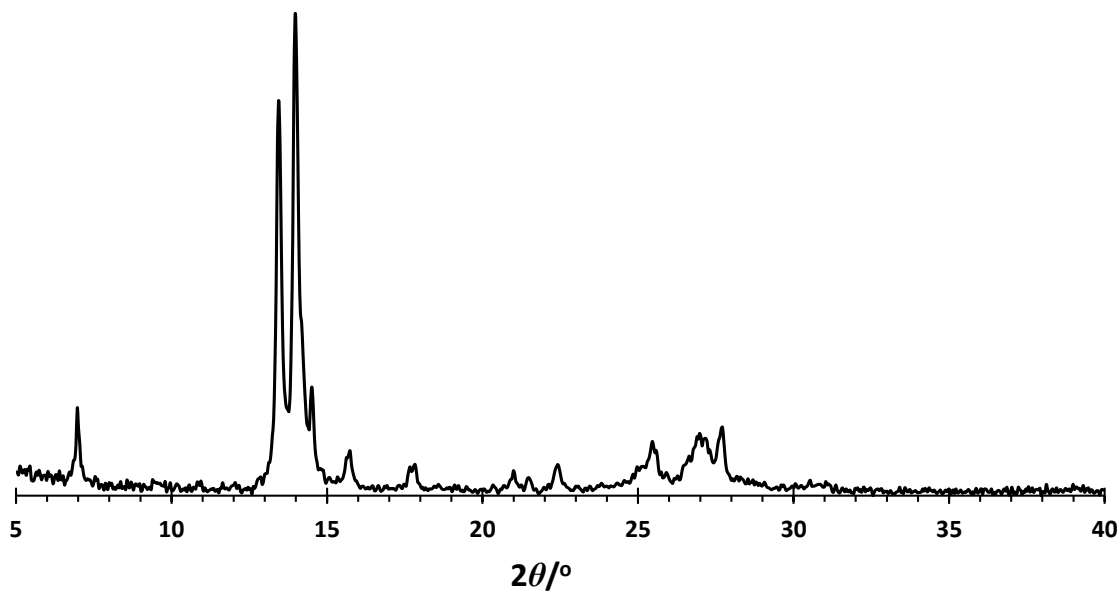

Figure S13. Experimentally acquired PXRD pattern of **H<sub>4</sub>L**.

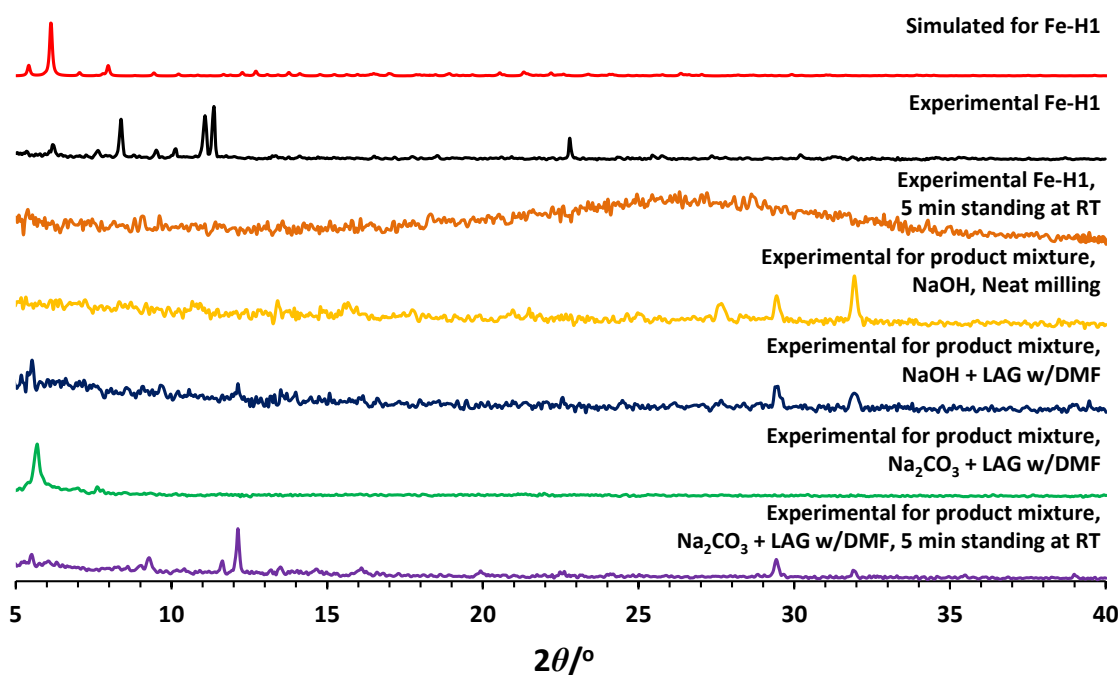

Figure S14. Simulated and experimentally acquired PXRD pattern of **Fe-H1**.

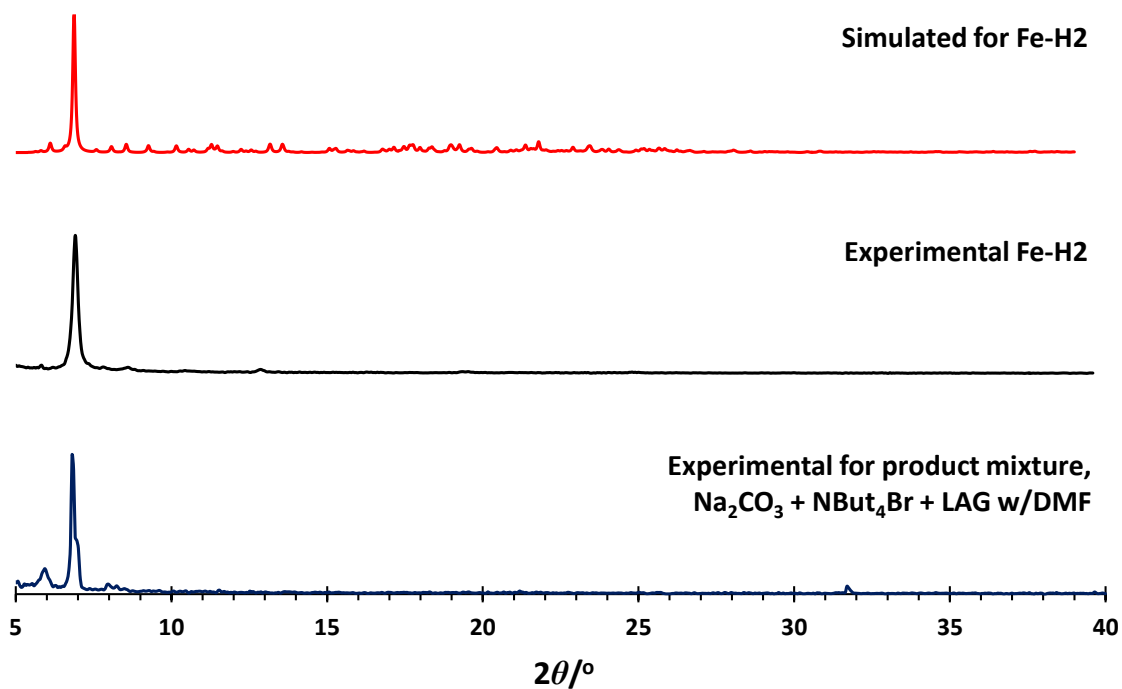

**Figure S15.** Simulated and experimentally acquired PXRD pattern of **Fe-H2**.

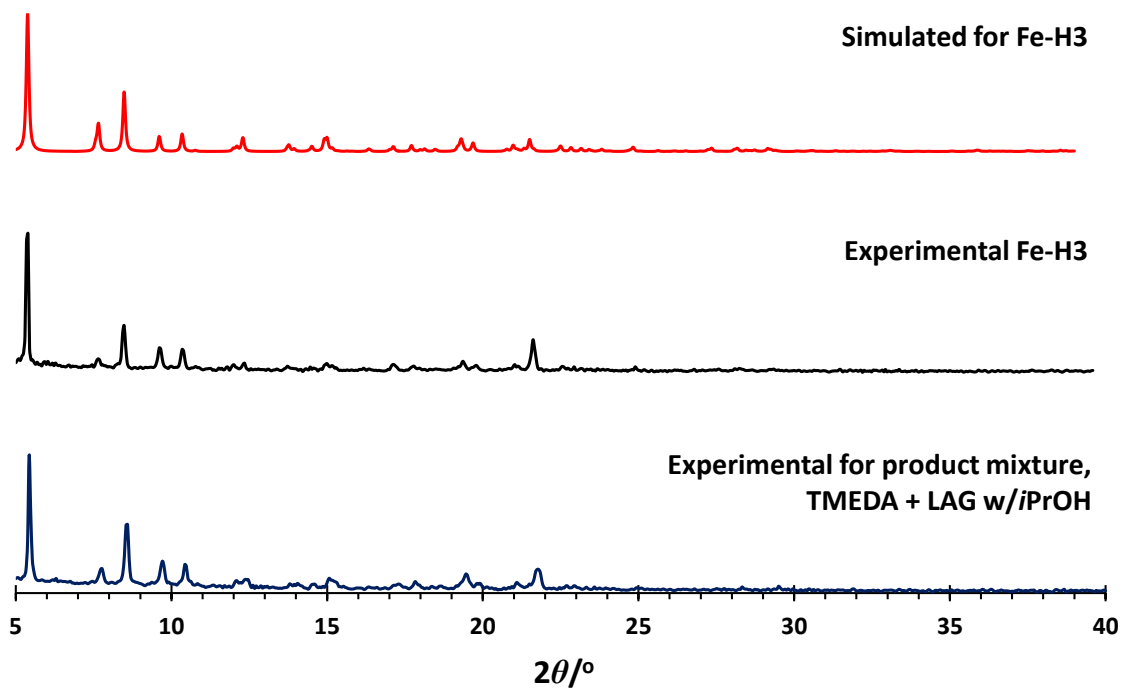

**Figure S16.** Simulated and experimentally acquired PXRD pattern of **Fe-H3**.

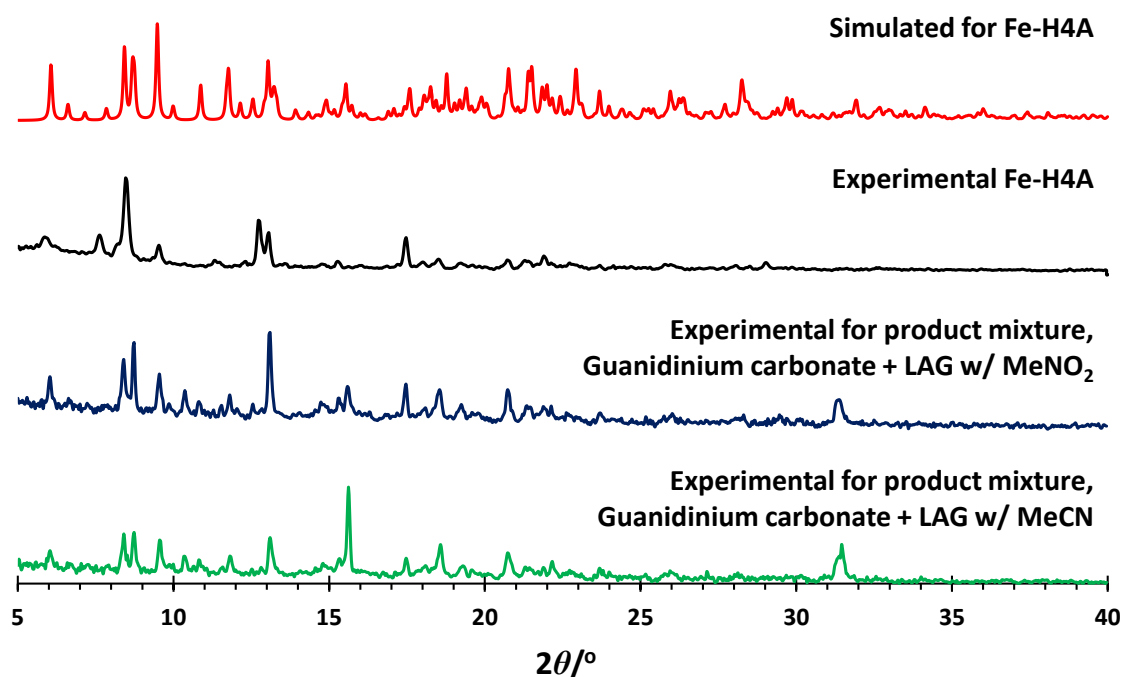

**Figure S17.** Simulated and experimentally acquired PXRD pattern of **Fe-H4A**.

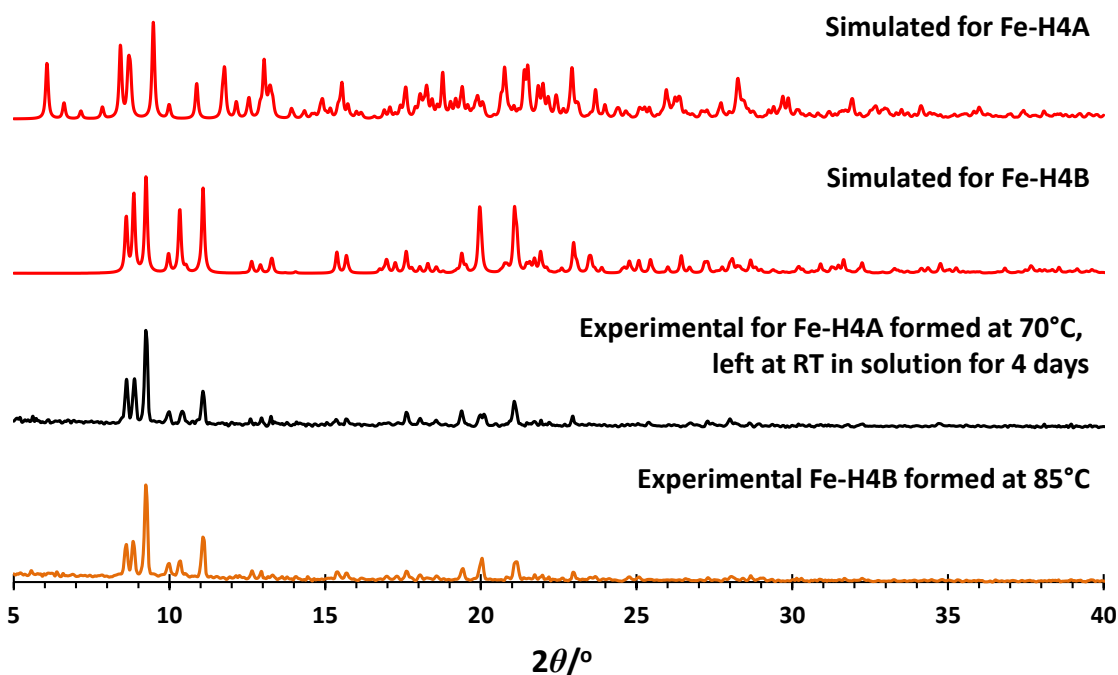

**Figure S18.** Simulated and experimentally acquired PXRD pattern of **Fe-H4B**, demonstrating conversion of **Fe-H4A** to **Fe-H4B** upon standing in solution.

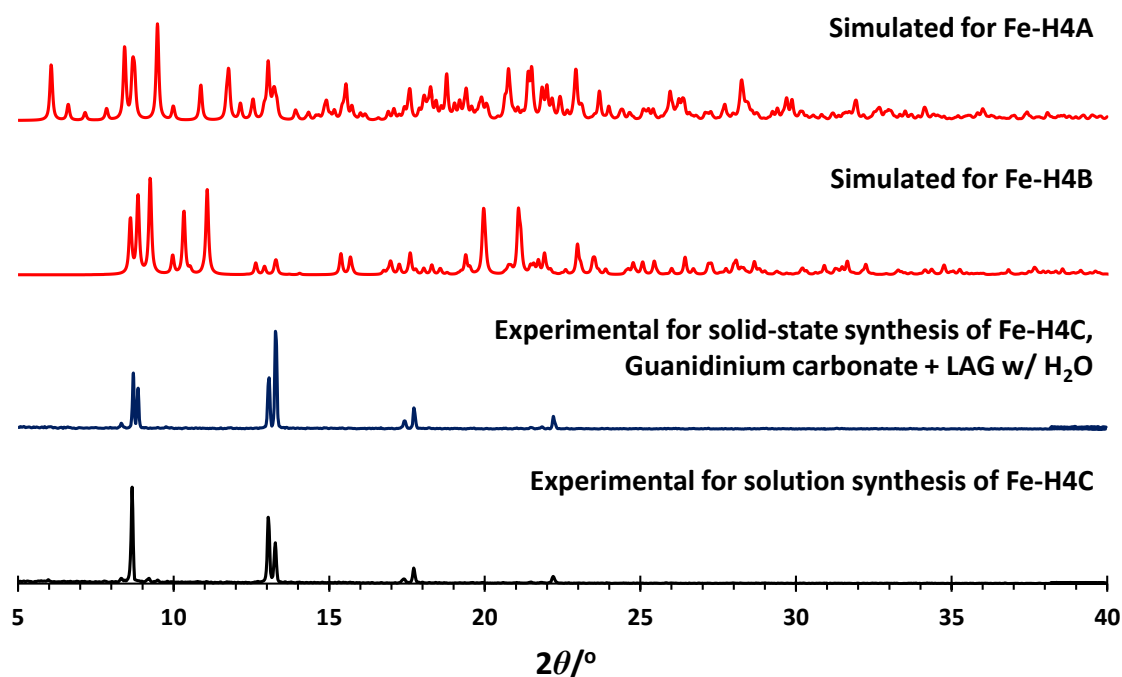

**Figure S19.** Comparison of simulated PXRD pattern of **Fe-H4A**, **Fe-H4B**, and experimental PXRD patterns of **Fe-H4C** acquired mechanochemically and from solution.

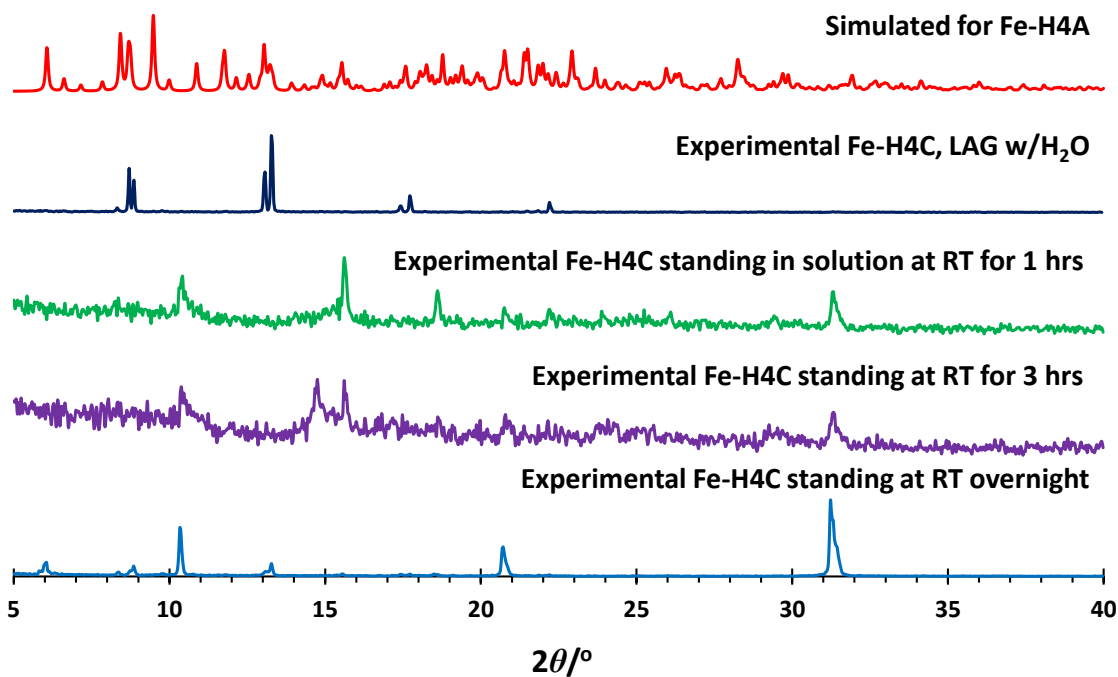

**Figure S20.** Comparison of simulated PXRD pattern of **Fe-H4A**, experimental PXRD patterns of **Fe-H4C** acquired mechanochemically, and **Fe-H4C** upon standing at room temperature, showing conversion to **Fe-H4A**.

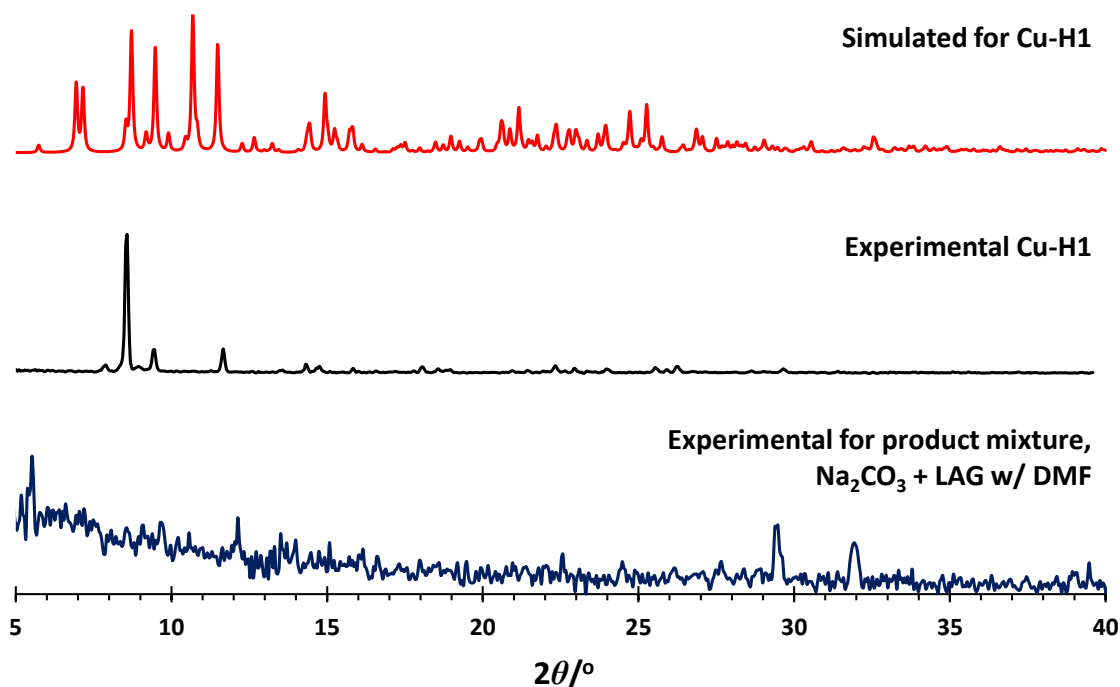

**Figure S21.** Simulated and experimentally acquired PXRD pattern of **Cu-H1**

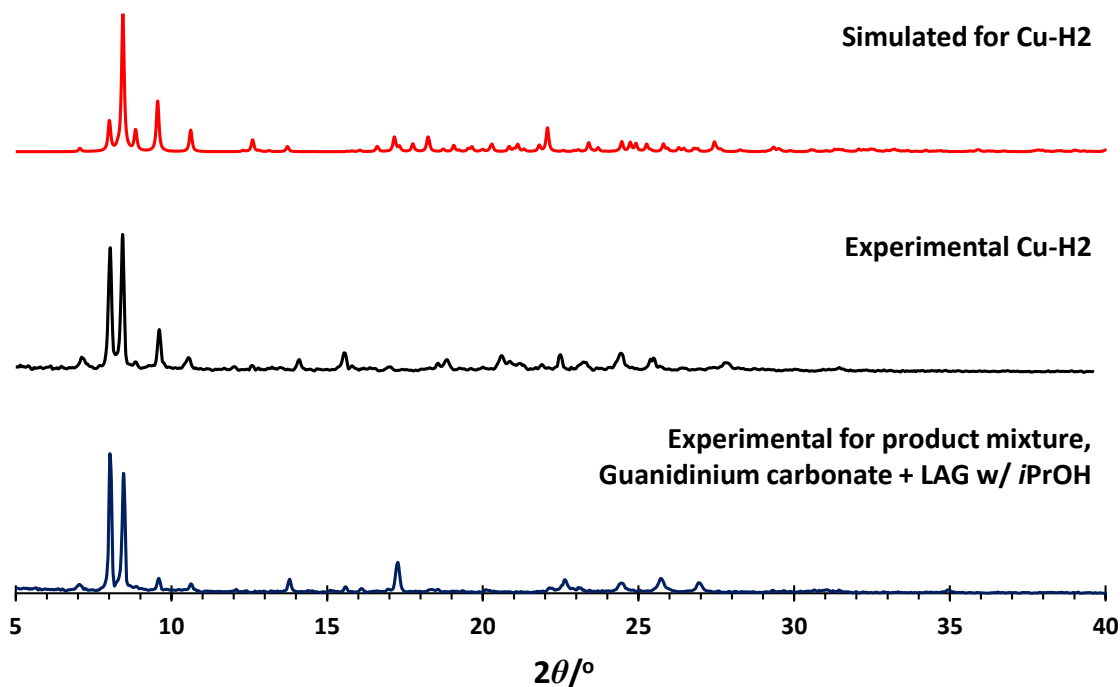

**Figure S22.** Simulated and experimentally acquired PXRD pattern of **Cu-H2** using Cu(OTf)<sub>2</sub>.

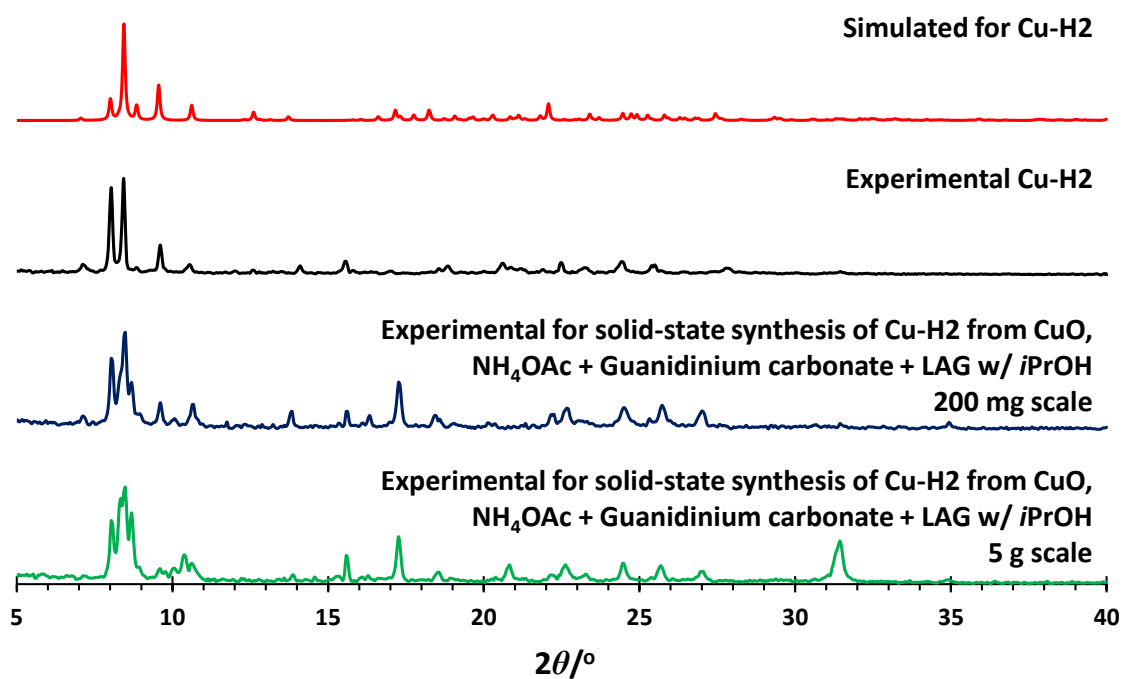

**Figure S23.** Simulated and experimentally acquired PXRD pattern of **Cu-H2** using CuO.

## 6. HR-MS Spectra

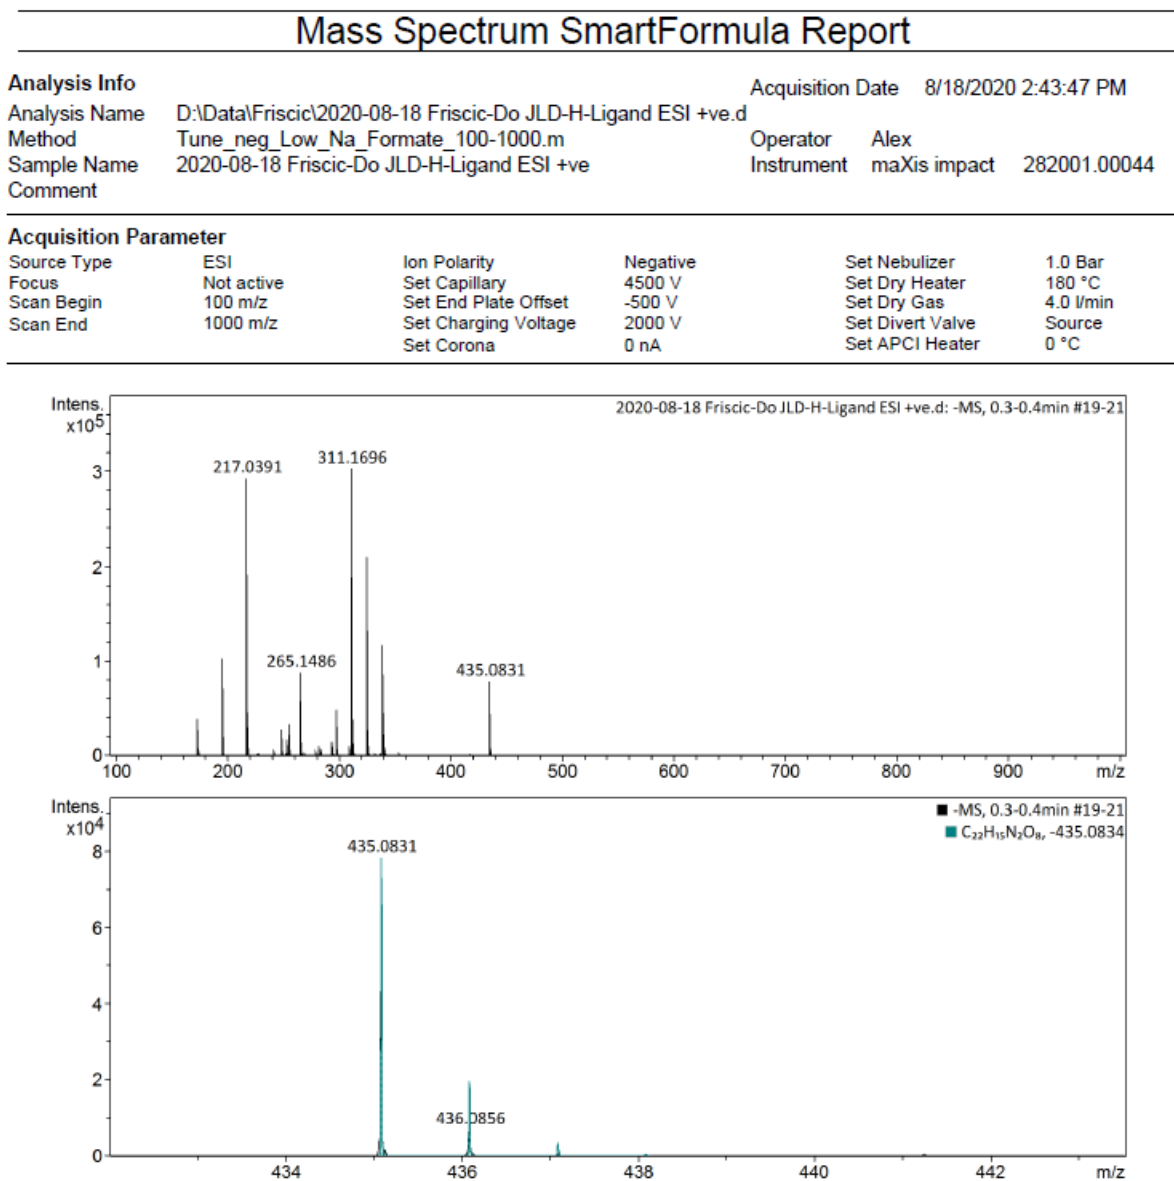

**Figure S24.** HR-MS spectrum for **H<sub>4</sub>L**.

## Mass Spectrum SmartFormula Report

### Analysis Info

Analysis Name D:\Data\Friscic\2020-07-16 Friscic-Do JLD-Fe-H1-Na ESI -ve.d  
Method Tune\_neg\_Mid\_AW.m  
Sample Name 2020-07-16 Friscic-Do JLD-Fe-H1-Na ESI -ve  
Comment

Acquisition Date 7/16/2020 11:45:39 AM

Operator Alex  
Instrument maXis impact 282001.00044

### Acquisition Parameter

|             |            |                      |          |                  |           |
|-------------|------------|----------------------|----------|------------------|-----------|
| Source Type | ESI        | Ion Polarity         | Negative | Set Nebulizer    | 0.4 Bar   |
| Focus       | Not active | Set Capillary        | 3500 V   | Set Dry Heater   | 180 °C    |
| Scan Begin  | 50 m/z     | Set End Plate Offset | -500 V   | Set Dry Gas      | 4.0 l/min |
| Scan End    | 3000 m/z   | Set Charging Voltage | 2000 V   | Set Divert Valve | Source    |
|             |            | Set Corona           | 0 nA     | Set APCI Heater  | 0 °C      |

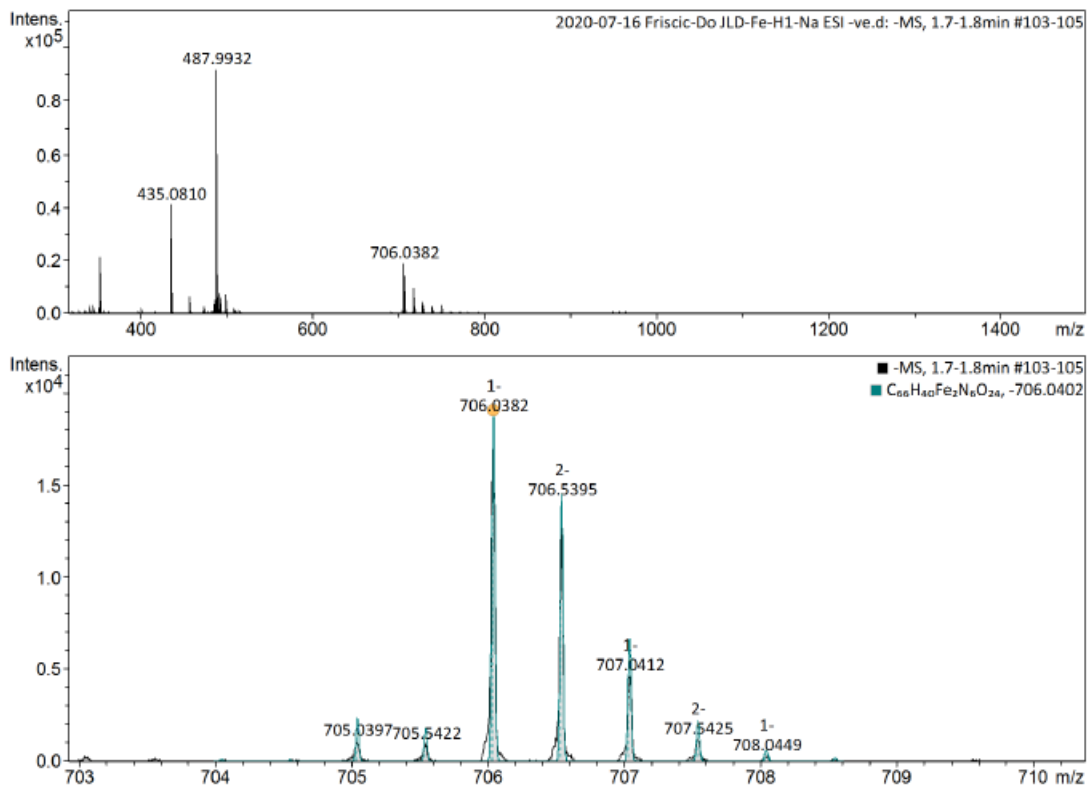

**Figure S25.** HR-MS spectrum for **Fe-H1** made in solution.

## Mass Spectrum SmartFormula Report

### Analysis Info

Analysis Name D:\Data\Friscic\2020-07-16 Friscic-Do JLD-Fe-H2-Na-But ESI -ve.d  
Method Tune\_neg\_Mid\_AW.m  
Sample Name 2020-07-16 Friscic-Do JLD-Fe-H2-Na-But ESI -ve  
Comment

Acquisition Date 7/16/2020 12:12:42 PM

Operator Alex  
Instrument maXis impact 282001.00044

### Acquisition Parameter

|             |            |                      |          |                  |           |
|-------------|------------|----------------------|----------|------------------|-----------|
| Source Type | ESI        | Ion Polarity         | Negative | Set Nebulizer    | 0.4 Bar   |
| Focus       | Not active | Set Capillary        | 3500 V   | Set Dry Heater   | 180 °C    |
| Scan Begin  | 50 m/z     | Set End Plate Offset | -500 V   | Set Dry Gas      | 4.0 l/min |
| Scan End    | 3000 m/z   | Set Charging Voltage | 2000 V   | Set Divert Valve | Source    |
|             |            | Set Corona           | 0 nA     | Set APCI Heater  | 0 °C      |

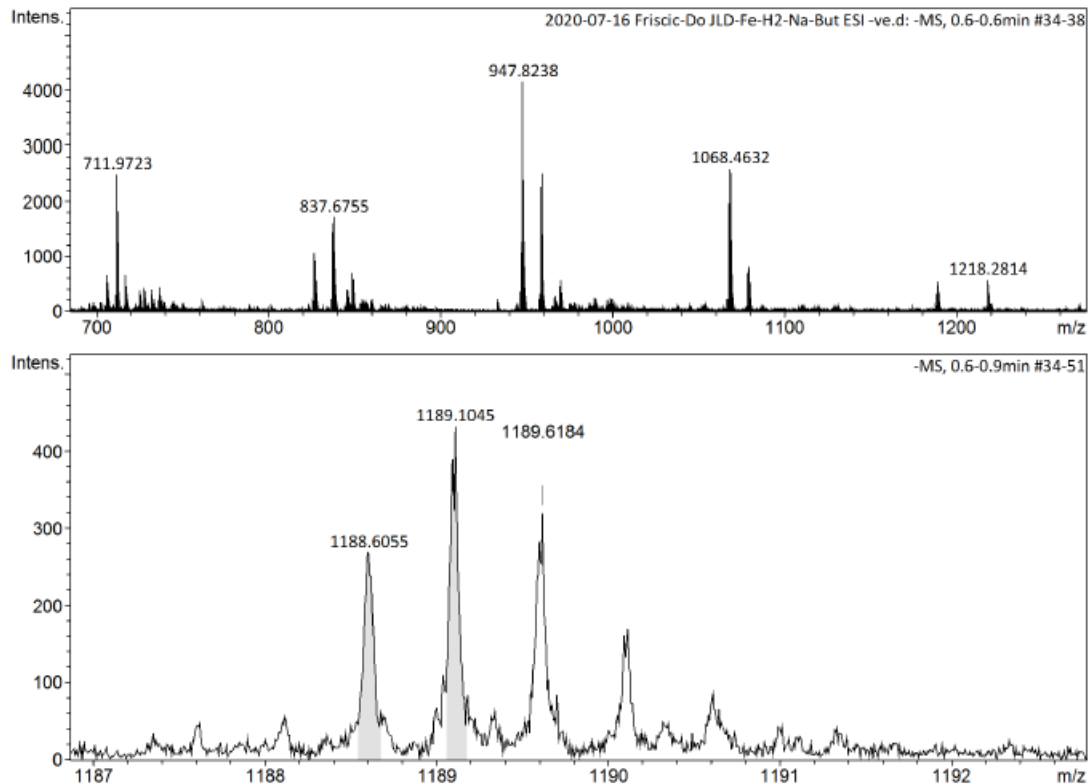

Figure S26. HR-MS spectrum for **Fe-H2** made in solution.

## Mass Spectrum SmartFormula Report

### Analysis Info

Analysis Name D:\Data\Friscic\2020-07-16 Friscic-Do JLD-Fe-H3-TMEDA ESI -ve.d  
Method Tune\_neg\_Mid\_AW.m  
Sample Name 2020-07-16 Friscic-Do JLD-Fe-H3-TMEDA ESI -ve  
Comment

Acquisition Date 7/16/2020 12:44:13 PM

Operator Alex  
Instrument maXis impact 282001.00044

### Acquisition Parameter

|             |            |                      |          |                  |           |
|-------------|------------|----------------------|----------|------------------|-----------|
| Source Type | ESI        | Ion Polarity         | Negative | Set Nebulizer    | 0.4 Bar   |
| Focus       | Not active | Set Capillary        | 3500 V   | Set Dry Heater   | 180 °C    |
| Scan Begin  | 50 m/z     | Set End Plate Offset | -500 V   | Set Dry Gas      | 4.0 l/min |
| Scan End    | 3000 m/z   | Set Charging Voltage | 2000 V   | Set Divert Valve | Source    |
|             |            | Set Corona           | 0 nA     | Set APCI Heater  | 0 °C      |

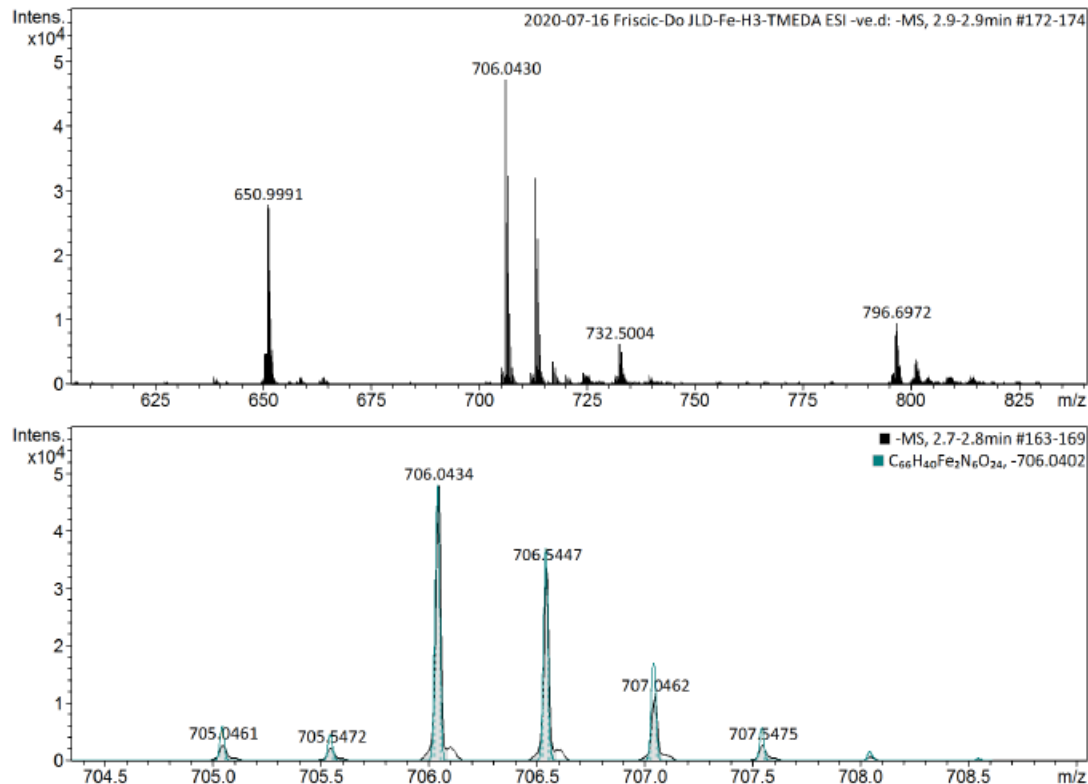

Figure S27. HR-MS spectrum for **Fe-H3** made in solution.

## Display Report

### Analysis Info

Analysis Name D:\Data\Friscic\2020-07-16 Friscic-Do JLD-Fe-H4-Gua ESI -ve.d  
Method Tune\_neg\_Mid\_AW.m  
Sample Name 2020-07-16 Friscic-Do JLD-Fe-H4-Gua ESI -ve  
Comment

Acquisition Date 7/16/2020 1:49:23 PM

Operator Alex  
Instrument maXis impact 282001.00044

### Acquisition Parameter

|             |            |                      |          |                  |           |
|-------------|------------|----------------------|----------|------------------|-----------|
| Source Type | ESI        | Ion Polarity         | Negative | Set Nebulizer    | 0.4 Bar   |
| Focus       | Not active | Set Capillary        | 3500 V   | Set Dry Heater   | 180 °C    |
| Scan Begin  | 50 m/z     | Set End Plate Offset | -500 V   | Set Dry Gas      | 4.0 l/min |
| Scan End    | 3000 m/z   | Set Charging Voltage | 2000 V   | Set Divert Valve | Source    |
|             |            | Set Corona           | 0 nA     | Set APCI Heater  | 0 °C      |

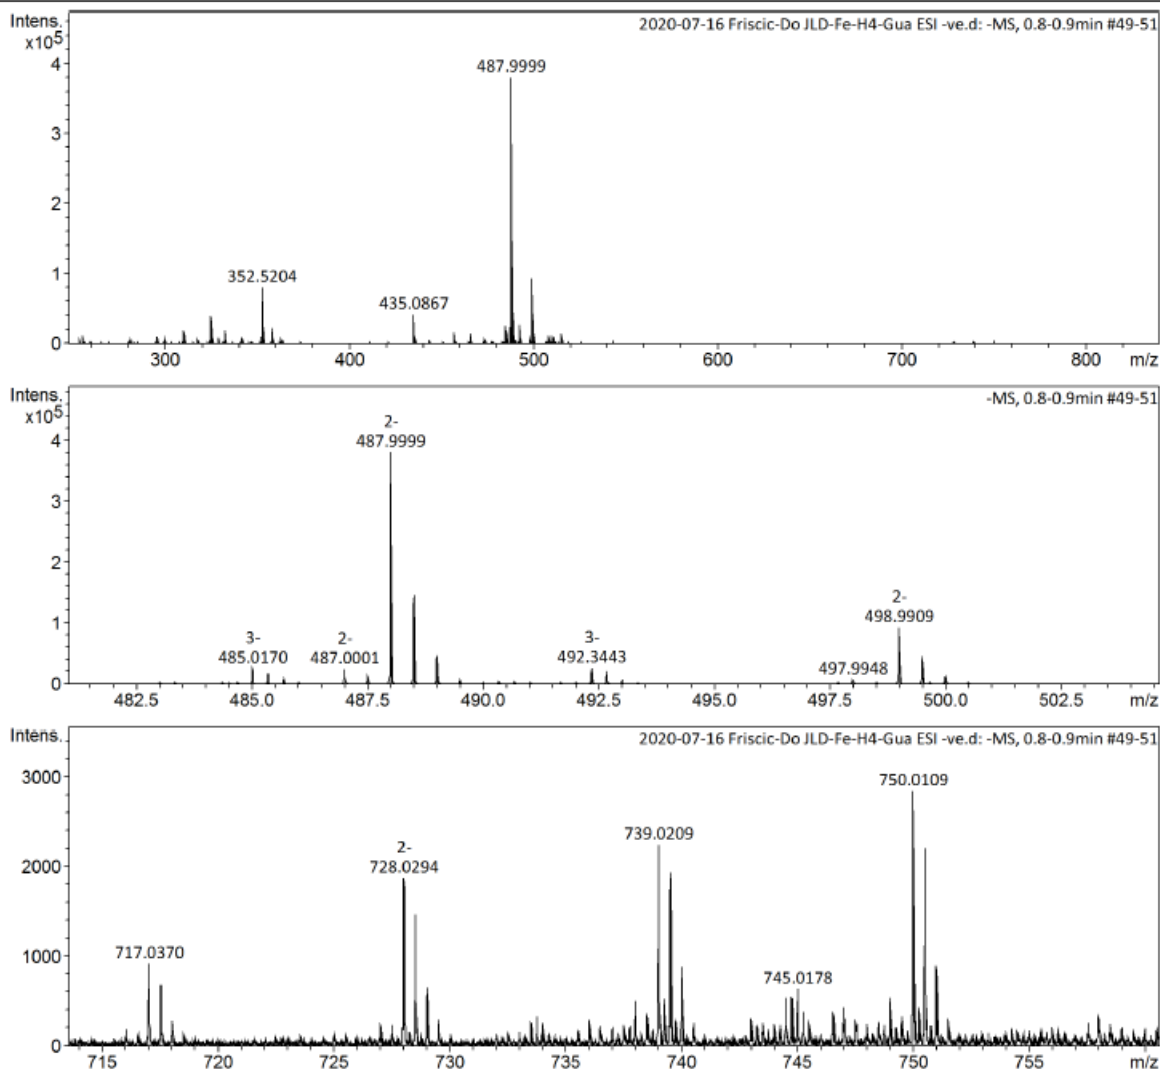

**Figure S28.** HR-MS spectrum for **Fe-H4A** made in solution.

## Mass Spectrum SmartFormula Report

### Analysis Info

Analysis Name D:\Data\Friscic\2020-07-16 Friscic-Do JLD-Cu-H1-Na ESI -ve.d  
Method Tune\_neg\_Mid\_AW.m  
Sample Name 2020-07-16 Friscic-Do JLD-Cu-H1-Na ESI -ve  
Comment

Acquisition Date 7/16/2020 1:28:56 PM

Operator Alex  
Instrument maXis impact 282001.00044

### Acquisition Parameter

|             |            |                      |          |                  |           |
|-------------|------------|----------------------|----------|------------------|-----------|
| Source Type | ESI        | Ion Polarity         | Negative | Set Nebulizer    | 0.4 Bar   |
| Focus       | Not active | Set Capillary        | 3500 V   | Set Dry Heater   | 180 °C    |
| Scan Begin  | 50 m/z     | Set End Plate Offset | -500 V   | Set Dry Gas      | 4.0 l/min |
| Scan End    | 3000 m/z   | Set Charging Voltage | 2000 V   | Set Divert Valve | Source    |
|             |            | Set Corona           | 0 nA     | Set APCI Heater  | 0 °C      |

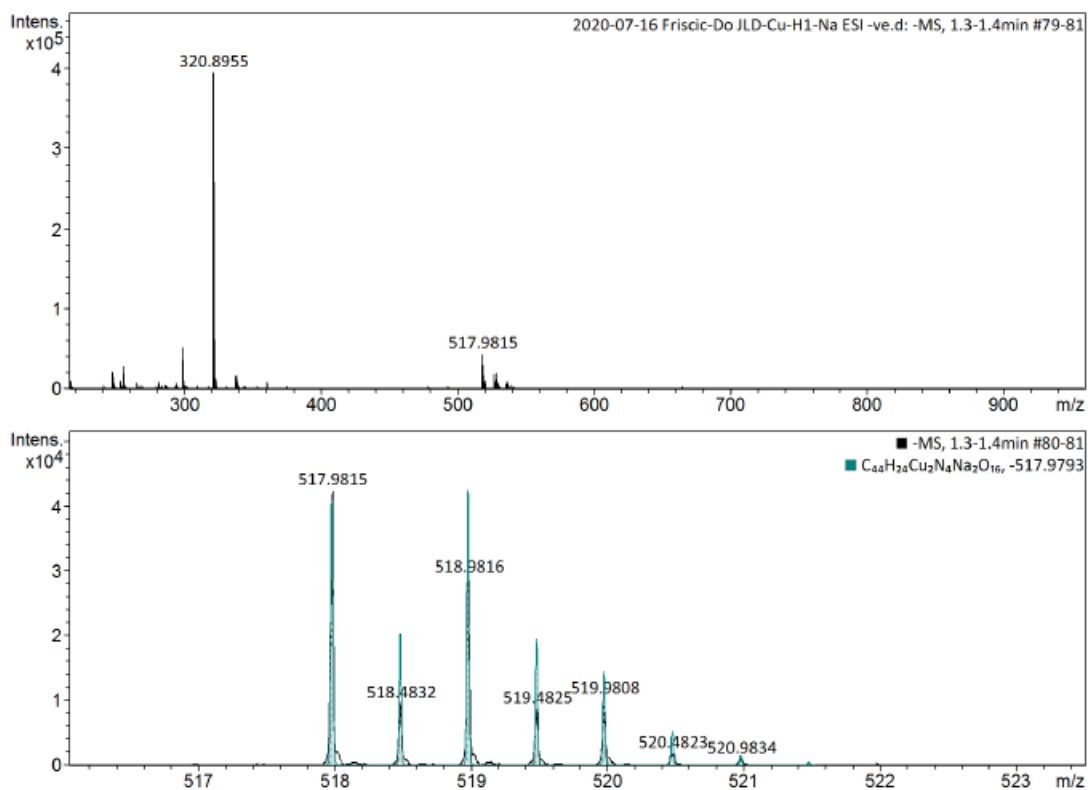

**Figure S29.** HR-MS spectrum for **Cu-H1** made in solution.

## Mass Spectrum SmartFormula Report

### Analysis Info

Analysis Name D:\Data\Friscic\2020-07-16 Friscic-Do JLD-Cu-H2-Gua ESI -ve.d  
Method Tune\_neg\_Mid\_AW.m  
Sample Name 2020-07-16 Friscic-Do JLD-Cu-H2-Gua ESI -ve  
Comment

Acquisition Date 7/16/2020 2:02:44 PM  
Operator Alex  
Instrument maXis impact 282001.00044

### Acquisition Parameter

|             |            |                      |          |                  |           |
|-------------|------------|----------------------|----------|------------------|-----------|
| Source Type | ESI        | Ion Polarity         | Negative | Set Nebulizer    | 0.4 Bar   |
| Focus       | Not active | Set Capillary        | 3500 V   | Set Dry Heater   | 180 °C    |
| Scan Begin  | 50 m/z     | Set End Plate Offset | -500 V   | Set Dry Gas      | 4.0 l/min |
| Scan End    | 3000 m/z   | Set Charging Voltage | 2000 V   | Set Divert Valve | Source    |
|             |            | Set Corona           | 0 nA     | Set APCI Heater  | 0 °C      |

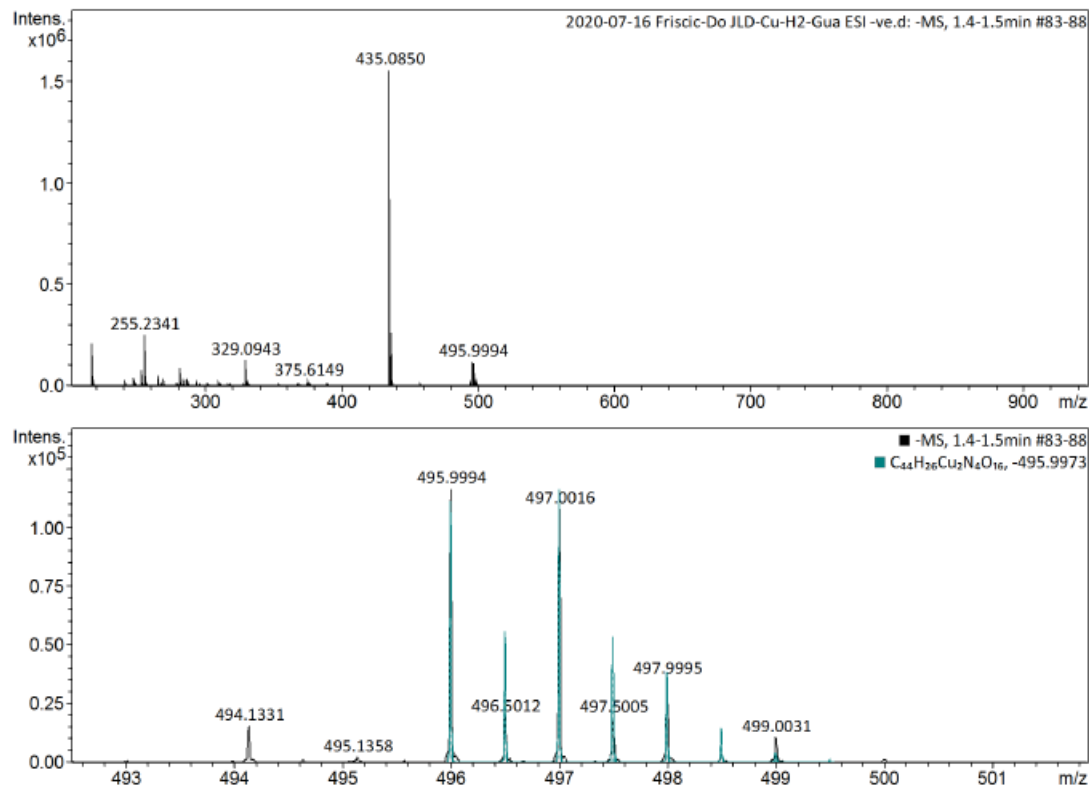

Figure S30. HR-MS spectrum for **Cu-H2** made in solution.

## Mass Spectrum SmartFormula Report

### Analysis Info

Analysis Name D:\Data\Friscic\2020-07-27 Friscic-Do JLD-Fe-H1-MC ESI -ve.d  
Method Tune\_neg\_Mid\_AW.m  
Sample Name 2020-07-27 Friscic-Do JLD-Fe-H1-MC ESI -ve  
Comment

Acquisition Date 7/27/2020 4:49:30 PM

Operator Alex  
Instrument maXis impact 282001.00044

### Acquisition Parameter

|             |            |                      |          |                  |           |
|-------------|------------|----------------------|----------|------------------|-----------|
| Source Type | ESI        | Ion Polarity         | Negative | Set Nebulizer    | 0.4 Bar   |
| Focus       | Not active | Set Capillary        | 3500 V   | Set Dry Heater   | 180 °C    |
| Scan Begin  | 50 m/z     | Set End Plate Offset | -500 V   | Set Dry Gas      | 4.0 l/min |
| Scan End    | 3000 m/z   | Set Charging Voltage | 2000 V   | Set Divert Valve | Source    |
|             |            | Set Corona           | 0 nA     | Set APCI Heater  | 0 °C      |

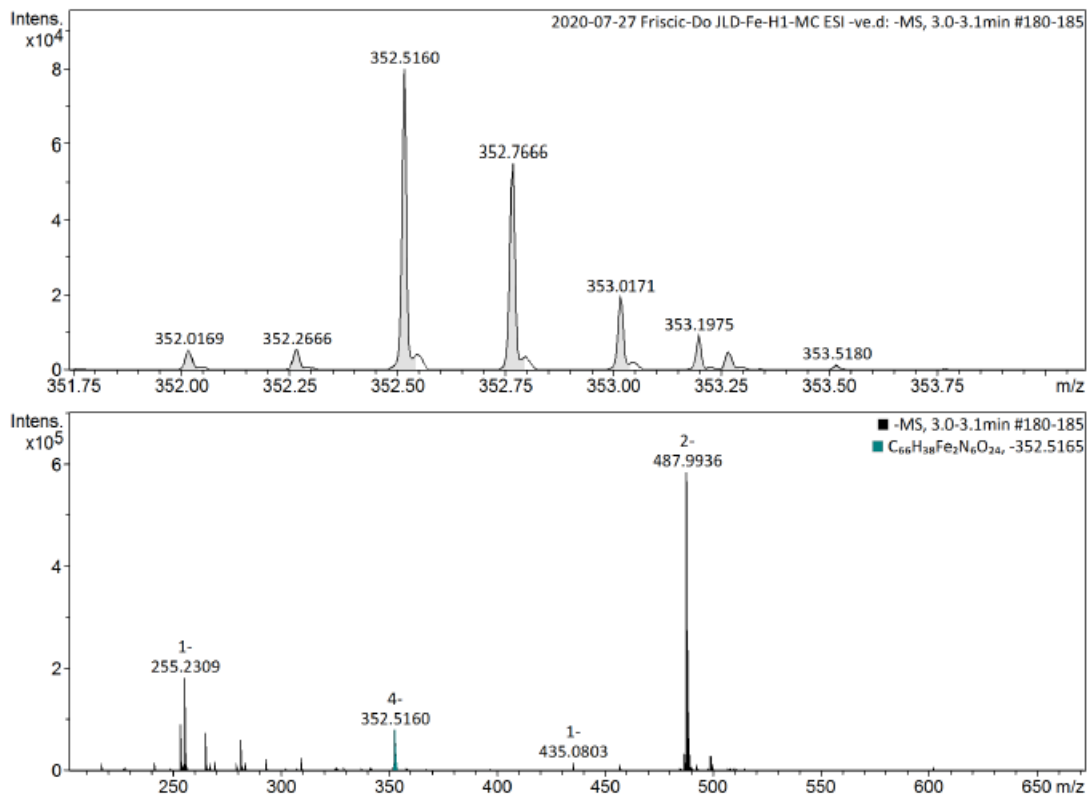

Figure S31. HR-MS spectrum for **Fe-H1** made mechanochemically.

## Mass Spectrum SmartFormula Report

### Analysis Info

Analysis Name D:\Data\Friscic\2020-07-27 Friscic-Do JLD-Fe-H2-MC ESI -ve.d

Method Tune\_neg\_Mid\_AW.m

Sample Name 2020-07-27 Friscic-Do JLD-Fe-H2-MC ESI -ve

Comment

Acquisition Date 7/27/2020 5:17:48 PM

Operator Alex

Instrument maXis impact 282001.00044

### Acquisition Parameter

|             |            |                      |          |                  |           |
|-------------|------------|----------------------|----------|------------------|-----------|
| Source Type | ESI        | Ion Polarity         | Negative | Set Nebulizer    | 0.4 Bar   |
| Focus       | Not active | Set Capillary        | 3500 V   | Set Dry Heater   | 180 °C    |
| Scan Begin  | 50 m/z     | Set End Plate Offset | -500 V   | Set Dry Gas      | 4.0 l/min |
| Scan End    | 3000 m/z   | Set Charging Voltage | 2000 V   | Set Divert Valve | Source    |
|             |            | Set Corona           | 0 nA     | Set APCI Heater  | 0 °C      |

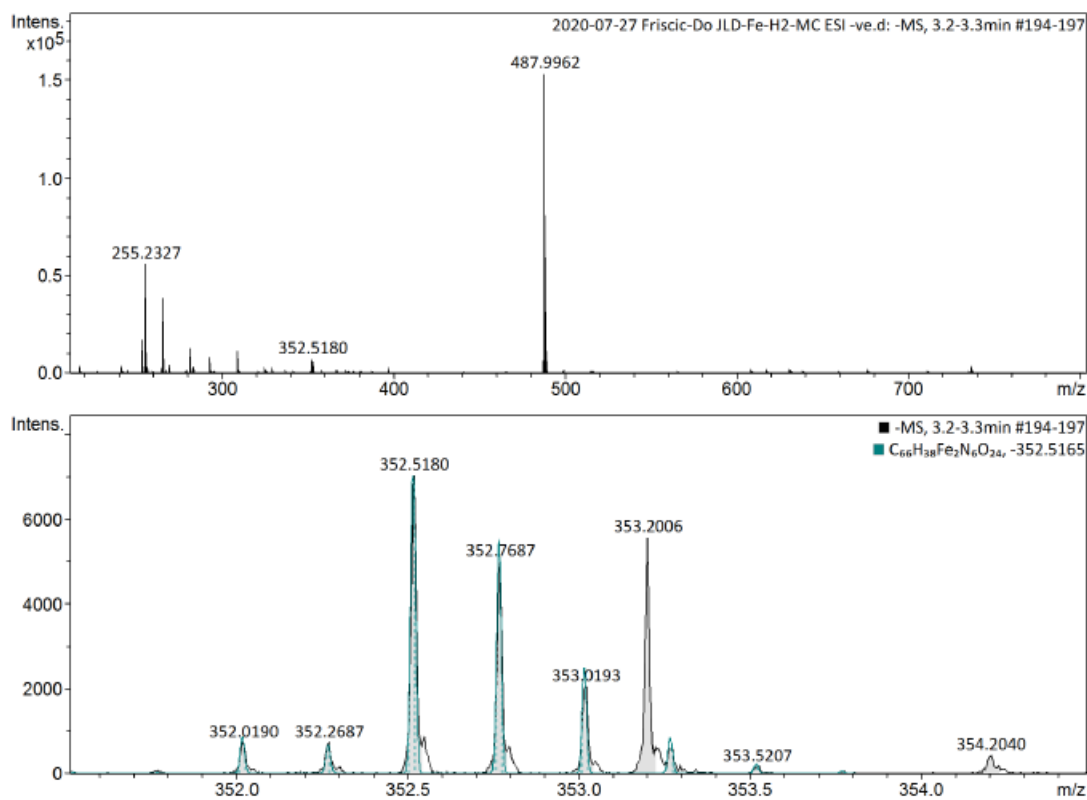

**Figure S32.** HR-MS spectrum for **Fe-H2** made mechanochemically.

## Mass Spectrum SmartFormula Report

### Analysis Info

Analysis Name D:\Data\Friscic\2020-07-27 Friscic-Do JLD-Fe-H3-MC ESI -ve.d  
Method Tune\_neg\_Mid\_AW.m  
Sample Name 2020-07-27 Friscic-Do JLD-Fe-H3-MC ESI -ve  
Comment

Acquisition Date 7/27/2020 5:31:23 PM

Operator Alex  
Instrument maXis impact 282001.00044

### Acquisition Parameter

|             |            |                      |          |                  |           |
|-------------|------------|----------------------|----------|------------------|-----------|
| Source Type | ESI        | Ion Polarity         | Negative | Set Nebulizer    | 0.4 Bar   |
| Focus       | Not active | Set Capillary        | 3500 V   | Set Dry Heater   | 180 °C    |
| Scan Begin  | 50 m/z     | Set End Plate Offset | -500 V   | Set Dry Gas      | 4.0 l/min |
| Scan End    | 3000 m/z   | Set Charging Voltage | 2000 V   | Set Divert Valve | Source    |
|             |            | Set Corona           | 0 nA     | Set APCI Heater  | 0 °C      |

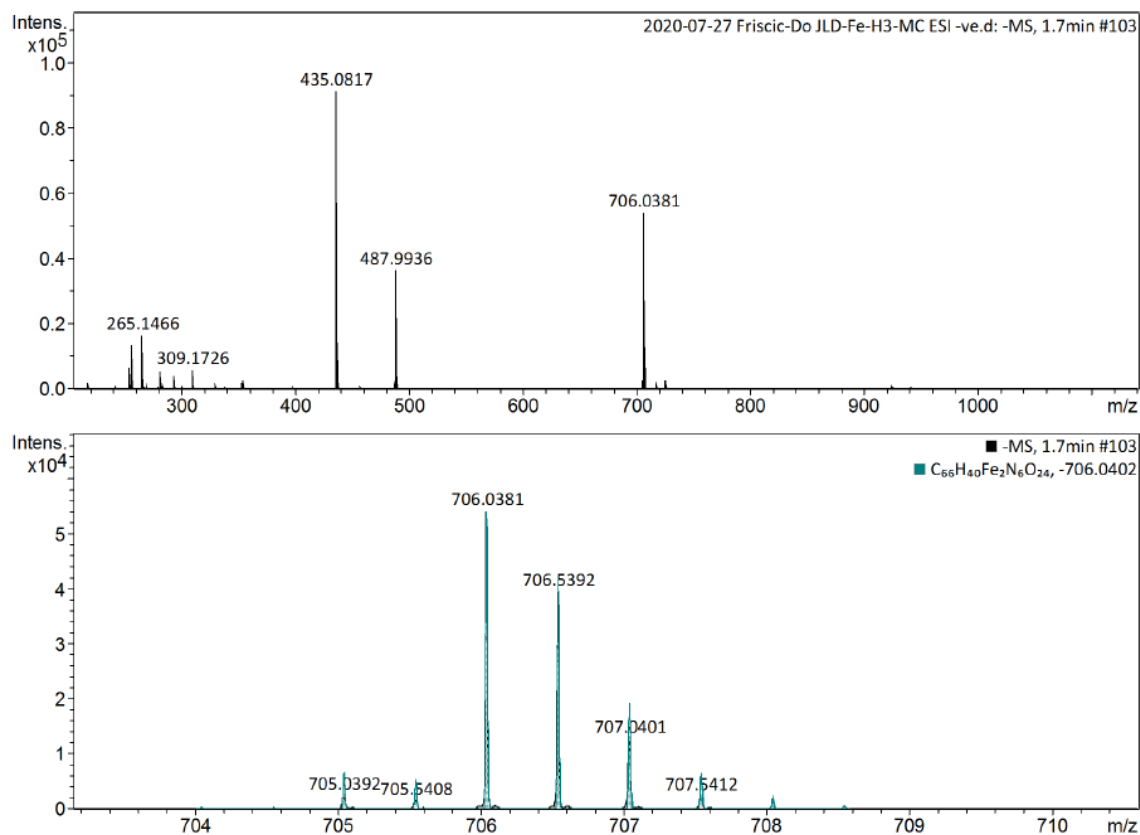

**Figure S33.** HR-MS spectrum for **Fe-H3** made mechanochemically.

## Mass Spectrum SmartFormula Report

### Analysis Info

Analysis Name D:\Data\Friscic\2020-07-27 Friscic-Do JLD-Fe-H4-MC ESI -ve.d  
Method Tune\_neg\_Mid\_AW.m  
Sample Name 2020-07-27 Friscic-Do JLD-Fe-H4-MC ESI -ve  
Comment

Acquisition Date 7/27/2020 6:01:11 PM

Operator Alex  
Instrument maXis impact 282001.00044

### Acquisition Parameter

|             |            |                      |          |                  |           |
|-------------|------------|----------------------|----------|------------------|-----------|
| Source Type | ESI        | Ion Polarity         | Negative | Set Nebulizer    | 0.4 Bar   |
| Focus       | Not active | Set Capillary        | 3500 V   | Set Dry Heater   | 180 °C    |
| Scan Begin  | 50 m/z     | Set End Plate Offset | -500 V   | Set Dry Gas      | 4.0 l/min |
| Scan End    | 3000 m/z   | Set Charging Voltage | 2000 V   | Set Divert Valve | Source    |
|             |            | Set Corona           | 0 nA     | Set APCI Heater  | 0 °C      |

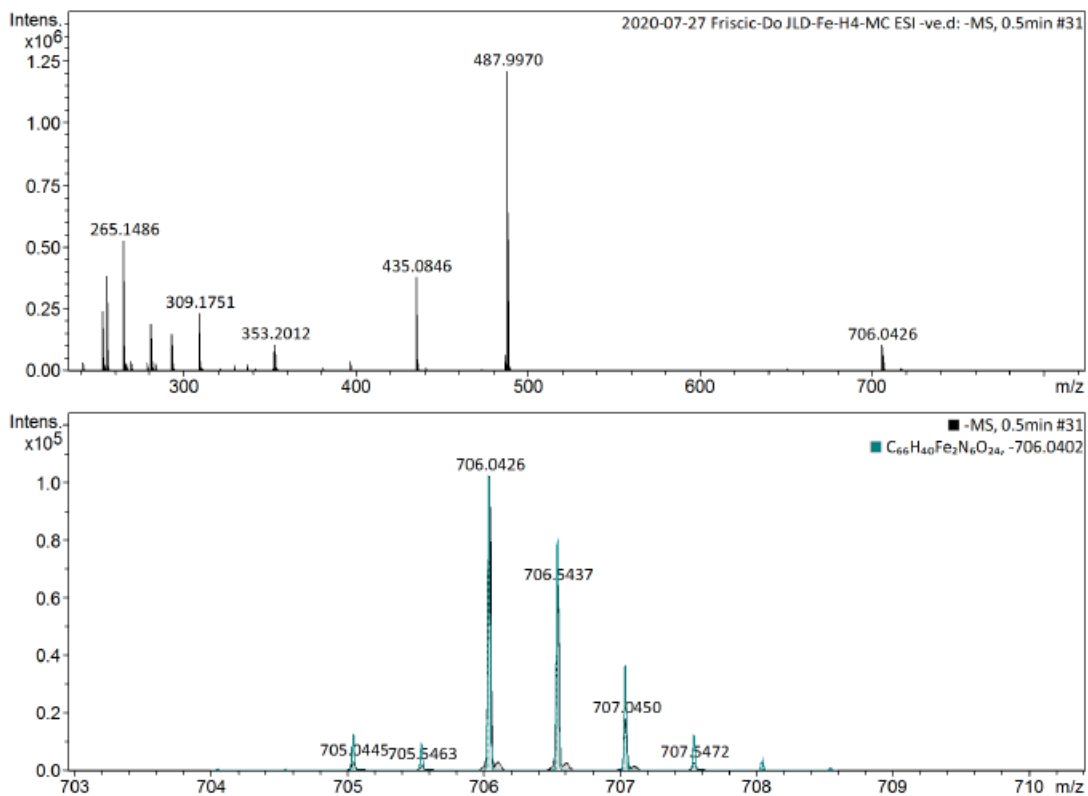

**Figure S34.** HR-MS spectrum for **Fe-H4A** made mechanochemically.

## Mass Spectrum SmartFormula Report

### Analysis Info

Analysis Name D:\Data\Friscic\2020-07-27 Friscic-Do JLD-Cu-H1-MC ESI -ve.d  
Method Tune\_neg\_Mid\_AW.m  
Sample Name 2020-07-27 Friscic-Do JLD-Cu-H1-MC ESI -ve  
Comment

Acquisition Date 7/27/2020 6:14:23 PM

Operator Alex  
Instrument maXis impact 282001.00044

### Acquisition Parameter

|             |            |                      |          |                  |           |
|-------------|------------|----------------------|----------|------------------|-----------|
| Source Type | ESI        | Ion Polarity         | Negative | Set Nebulizer    | 0.4 Bar   |
| Focus       | Not active | Set Capillary        | 3500 V   | Set Dry Heater   | 180 °C    |
| Scan Begin  | 50 m/z     | Set End Plate Offset | -500 V   | Set Dry Gas      | 4.0 l/min |
| Scan End    | 3000 m/z   | Set Charging Voltage | 2000 V   | Set Divert Valve | Source    |
|             |            | Set Corona           | 0 nA     | Set APCI Heater  | 0 °C      |

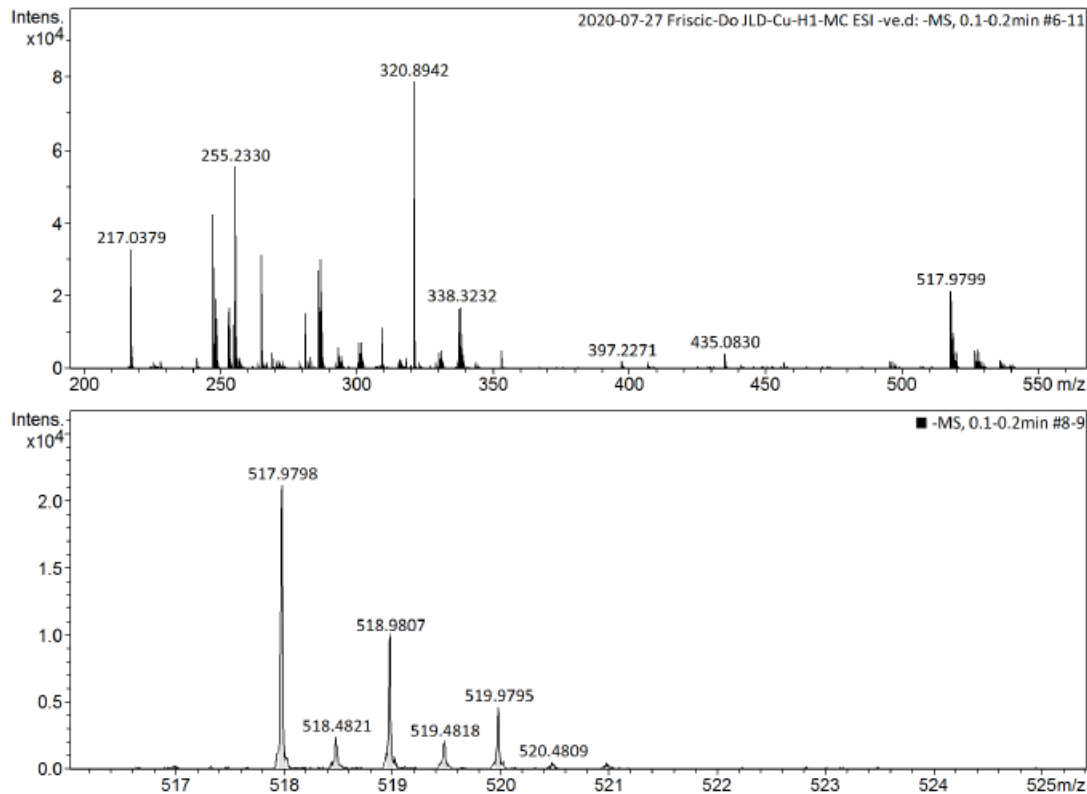

Figure S35. HR-MS spectrum for **Cu-H1** made mechanochemically.

## Mass Spectrum SmartFormula Report

### Analysis Info

Analysis Name D:\Data\Friscic\2020-07-27 Friscic-Do JLD-Cu-H2-MC ESI -ve.d  
Method Tune\_neg\_Mid\_AW.m  
Sample Name 2020-07-27 Friscic-Do JLD-Cu-H2-MC ESI -ve  
Comment

Acquisition Date 7/27/2020 6:22:25 PM  
Operator Alex  
Instrument maXis impact 282001.00044

### Acquisition Parameter

|             |            |                      |          |                  |           |
|-------------|------------|----------------------|----------|------------------|-----------|
| Source Type | ESI        | Ion Polarity         | Negative | Set Nebulizer    | 0.4 Bar   |
| Focus       | Not active | Set Capillary        | 3500 V   | Set Dry Heater   | 180 °C    |
| Scan Begin  | 50 m/z     | Set End Plate Offset | -500 V   | Set Dry Gas      | 4.0 l/min |
| Scan End    | 3000 m/z   | Set Charging Voltage | 2000 V   | Set Divert Valve | Source    |
|             |            | Set Corona           | 0 nA     | Set APCI Heater  | 0 °C      |

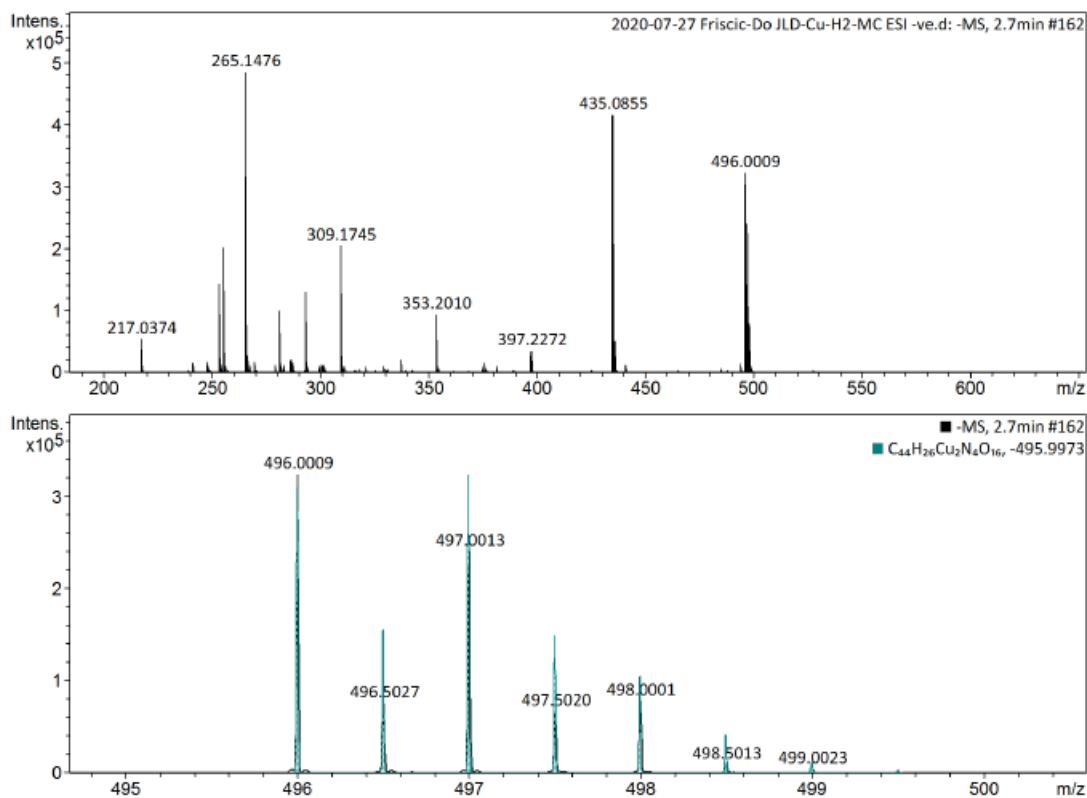

**Figure S36.** HR-MS spectrum for **Cu-H2** made mechanochemically from Cu(OTf)<sub>2</sub>.

## Mass Spectrum SmartFormula Report

### Analysis Info

Analysis Name D:\Data\Friscic\2020-07-27 Friscic-Do JLD-Cu-H2-O ESI -ve.d  
Method Tune\_neg\_Mid\_AW.m  
Sample Name 2020-07-27 Friscic-Do JLD-Cu-H2-O ESI -ve  
Comment

Acquisition Date 7/27/2020 6:44:25 PM

Operator Alex  
Instrument maXis impact 282001.00044

### Acquisition Parameter

|             |            |                      |          |                  |           |
|-------------|------------|----------------------|----------|------------------|-----------|
| Source Type | ESI        | Ion Polarity         | Negative | Set Nebulizer    | 0.4 Bar   |
| Focus       | Not active | Set Capillary        | 3500 V   | Set Dry Heater   | 180 °C    |
| Scan Begin  | 50 m/z     | Set End Plate Offset | -500 V   | Set Dry Gas      | 4.0 l/min |
| Scan End    | 3000 m/z   | Set Charging Voltage | 2000 V   | Set Divert Valve | Source    |
|             |            | Set Corona           | 0 nA     | Set APCI Heater  | 0 °C      |

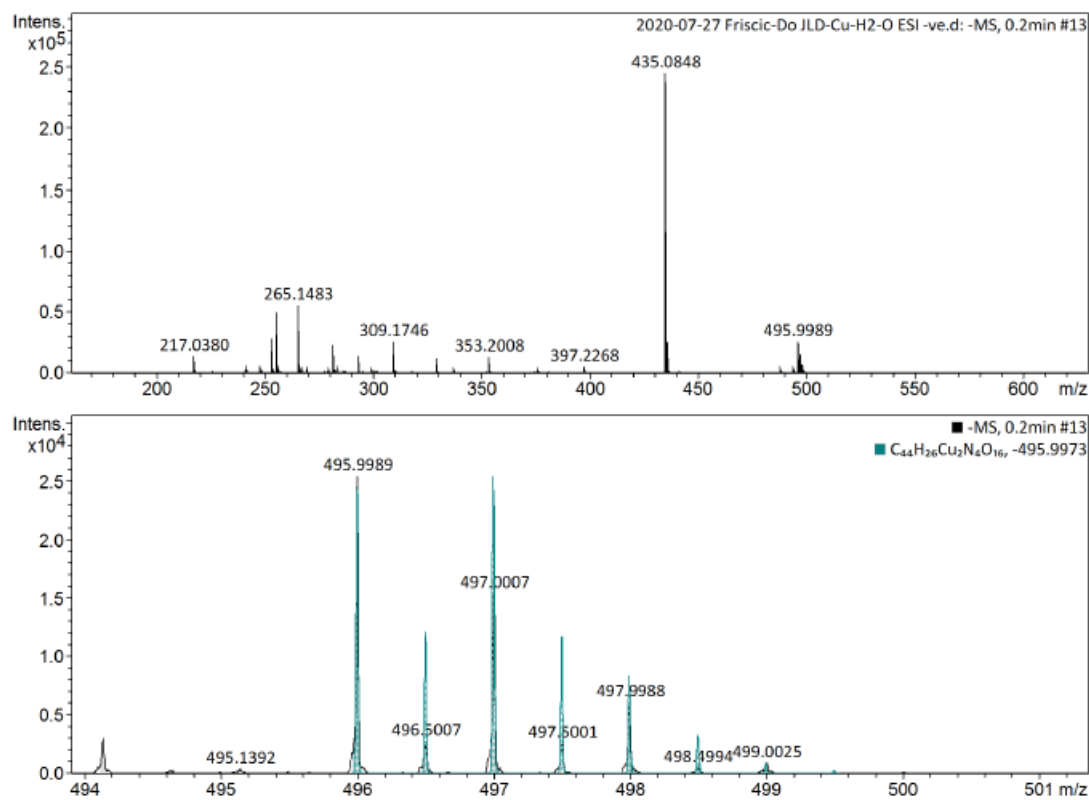

**Figure S37.** HR-MS spectrum for **Cu-H2** made mechanochemically from CuO.

## 7. Single Crystal X-ray Diffraction Data

Single crystal X-ray diffraction (SCXRD) data were measured on a Bruker D8 Venture diffractometer equipped with a Photon 200 area detector, and I $\mu$ S microfocus X-ray source (Bruker AXS, CuK $\alpha$  source). Crystals of **Fe-H1** were isolated on glass slides precooled using dry ice. It should be noted, except for the case of **Fe-H4B**, that all crystals when isolated from the solution had to be placed immediately under a stream of cold nitrogen to avoid loss of solvent of crystallization. All measurements were carried out at 150(2)K, except **Fe-H4A** at 180(2)K and **Fe-H4B** at RT, on coated crystal samples with thin layer of amorphous paratone oil, which decreases the thermal motion effects, deterioration and structural disorder to improve the accuracy of the structural results. Structure solution was carried out using the SHELXTL package from Bruker.<sup>1</sup> The parameters were refined for all data by full-matrix-least-squares or F2 using SHELXL.<sup>2</sup> All structures exhibit low stability in both RT and low temperature and the contribution of disordered solvate and cation moieties that could not be reliably modeled by discrete atoms were subtracted by SQUEEZE procedure, using the PLATON software.<sup>3</sup> For instance **Fe-H3** is twinned by inversion and also exhibits half cation, DMF and two water molecules, which were unsuccessfully resolved. Structures **Fe-H1**, **Fe-H2**, and **Cu-H1** contain disordered water molecules, while **Cu-H2** contains disordered half *i*PrOH. All of the non-hydrogen atoms were refined with anisotropic thermal parameters. Hydrogen atoms were placed in calculated positions and allowed to ride on the carrier atoms. All hydrogen atom thermal parameters were constrained to ride on the carrier atom.

**Table S1. Crystal data for the prepared Fe(III) and Cu(II) helicate solids.**

|                                                              | <b>Fe-H1</b>                                                                                   | <b>Fe-H2</b>                                                                                      | <b>Fe-H3</b>                                                                    | <b>Fe-H4A</b>                                                                     | <b>Fe-H4B</b>                                                                     | <b>Cu-H1</b>                                                                                  | <b>Cu-H2</b>                                                                    |
|--------------------------------------------------------------|------------------------------------------------------------------------------------------------|---------------------------------------------------------------------------------------------------|---------------------------------------------------------------------------------|-----------------------------------------------------------------------------------|-----------------------------------------------------------------------------------|-----------------------------------------------------------------------------------------------|---------------------------------------------------------------------------------|
| Empirical formula                                            | C <sub>90</sub> H <sub>97</sub> Fe <sub>2</sub> N <sub>11</sub> N <sub>a</sub> O <sub>36</sub> | C <sub>266</sub> H <sub>388</sub> Fe <sub>4</sub> N <sub>22</sub> Na <sub>4</sub> O <sub>57</sub> | C <sub>84</sub> H <sub>86</sub> Fe <sub>2</sub> N <sub>12</sub> O <sub>26</sub> | C <sub>144</sub> H <sub>170</sub> Fe <sub>4</sub> N <sub>48</sub> O <sub>61</sub> | C <sub>144</sub> H <sub>162</sub> Fe <sub>4</sub> N <sub>48</sub> O <sub>57</sub> | C <sub>53</sub> H <sub>47</sub> Cu <sub>2</sub> N <sub>7</sub> N <sub>a</sub> O <sub>20</sub> | C <sub>54</sub> H <sub>65</sub> Cu <sub>2</sub> N <sub>16</sub> O <sub>19</sub> |
| Formula weight/g mol <sup>-1</sup>                           | 2158.42                                                                                        | 5121.32                                                                                           | 1791.34                                                                         | 3772.67                                                                           | 3700.61                                                                           | 1321.01                                                                                       | 1369.30                                                                         |
| Temperature/K                                                | 150(2)                                                                                         | 150(2)                                                                                            | 150(2)                                                                          | 180(2)                                                                            | 298(2)                                                                            | 150(2)                                                                                        | 150(2)                                                                          |
| Crystal system                                               | monoclinic                                                                                     | monoclinic                                                                                        | orthorhombic                                                                    | triclinic                                                                         | monoclinic                                                                        | monoclinic                                                                                    | monoclinic                                                                      |
| Space group                                                  | <i>P</i> 2 <sub>1</sub> / <i>c</i>                                                             | <i>P</i> 2 <sub>1</sub> / <i>n</i>                                                                | <i>P</i> nn2                                                                    | <i>P</i> -1                                                                       | <i>C</i> 2/ <i>c</i>                                                              | <i>P</i> 2 <sub>1</sub> / <i>n</i>                                                            | <i>C</i> 2/ <i>c</i>                                                            |
| <i>a</i> /Å                                                  | 19.9223(9)                                                                                     | 26.1720(7)                                                                                        | 23.0817(5)                                                                      | 14.1272(12)                                                                       | 43.027(4)                                                                         | 13.5168(4)                                                                                    | 26.6408(15)                                                                     |
| <i>b</i> /Å                                                  | 28.8141(14)                                                                                    | 17.3890(5)                                                                                        | 23.3506(5)                                                                      | 14.8356(14)                                                                       | 9.8262(8)                                                                         | 30.7906(11)                                                                                   | 12.2924(7)                                                                      |
| <i>c</i> /Å                                                  | 17.4931(7)                                                                                     | 31.5009(8)                                                                                        | 10.0089(2)                                                                      | 20.7950(18)                                                                       | 20.9293(18)                                                                       | 14.0219(5)                                                                                    | 22.7172(12)                                                                     |
| $\alpha$ /°                                                  | 90                                                                                             | 90                                                                                                | 90                                                                              | 89.584(4)                                                                         | 90                                                                                | 90                                                                                            | 90                                                                              |
| $\beta$ /°                                                   | 97.020(3)                                                                                      | 95.918(2)                                                                                         | 90                                                                              | 74.544(3)                                                                         | 107.536(4)                                                                        | 94.730(2)                                                                                     | 110.066(2)                                                                      |
| $\gamma$ /°                                                  | 90                                                                                             | 90                                                                                                | 90                                                                              | 77.368(4)                                                                         | 90                                                                                | 90                                                                                            | 90                                                                              |
| Volume/Å <sup>3</sup>                                        | 9966.5(8)                                                                                      | 14259.8(7)                                                                                        | 5394.5(2)                                                                       | 4093.0(6)                                                                         | 8437.5(12)                                                                        | 5815.9(3)                                                                                     | 6987.8(7)                                                                       |
| <i>Z</i>                                                     | 4                                                                                              | 2                                                                                                 | 2                                                                               | 1                                                                                 | 2                                                                                 | 4                                                                                             | 4                                                                               |
| $\rho_{\text{calc}}$ /cm <sup>3</sup>                        | 1.438                                                                                          | 1.193                                                                                             | 1.103                                                                           | 1.531                                                                             | 1.457                                                                             | 1.509                                                                                         | 1.302                                                                           |
| $\mu$ /mm <sup>-1</sup>                                      | 3.365                                                                                          | 2.270                                                                                             | 2.728                                                                           | 3.711                                                                             | 3.572                                                                             | 1.897                                                                                         | 1.396                                                                           |
| <i>F</i> (000)                                               | 4480.0                                                                                         | 5484.0                                                                                            | 1868.0                                                                          | 1972.0                                                                            | 3844.0                                                                            | 2704.0                                                                                        | 2844.0                                                                          |
| 2 $\theta$ range for data collection/°                       | 4.468 to 144.76                                                                                | 4.632 to 145.138                                                                                  | 5.384 to 144.794                                                                | 6.114 to 144.71                                                                   | 8.608 to 144.53                                                                   | 6.946 to 145.632                                                                              | 8.856 to 146.156                                                                |
| Reflections collected                                        | 183477                                                                                         | 1518319                                                                                           | 81953                                                                           | 125279                                                                            | 42656                                                                             | 56134                                                                                         | 55069                                                                           |
| Independent reflections                                      | 19672 [ <i>R</i> <sub>int</sub> = 0.1499, <i>R</i> <sub>sigma</sub> = 0.0842]                  | 28059 [ <i>R</i> <sub>int</sub> = 0.1092, <i>R</i> <sub>sigma</sub> = 0.0725]                     | 10327 [ <i>R</i> <sub>int</sub> = 0.0962, <i>R</i> <sub>sigma</sub> = 0.0637]   | 16141 [ <i>R</i> <sub>int</sub> = 0.1771, <i>R</i> <sub>sigma</sub> = 0.0908]     | 8023 [ <i>R</i> <sub>int</sub> = 0.0951, <i>R</i> <sub>sigma</sub> = 0.0664]      | 11419 [ <i>R</i> <sub>int</sub> = 0.0435, <i>R</i> <sub>sigma</sub> = 0.0358]                 | 6868 [ <i>R</i> <sub>int</sub> = 0.0438, <i>R</i> <sub>sigma</sub> = 0.0247]    |
| Data/restraints/parameters                                   | 19672/1620/1348                                                                                | 28059/2857/1779                                                                                   | 10327/488/566                                                                   | 16141/1056/111214                                                                 | 8023/571/659                                                                      | 11416/921/777                                                                                 | 6868/9/416                                                                      |
| Goodness-of-fit on <i>F</i> <sup>2</sup>                     | 1.051                                                                                          | 1.056                                                                                             | 1.012                                                                           | 1.014                                                                             | 1.076                                                                             | 1.073                                                                                         | 1.080                                                                           |
| Final <i>R</i> indexes [ <i>I</i> ≥ 2 $\sigma$ ( <i>I</i> )] | <i>R</i> <sub>1</sub> = 0.1296, <i>wR</i> <sub>2</sub> = 0.3298                                | <i>R</i> <sub>1</sub> = 0.0905, <i>wR</i> <sub>2</sub> = 0.2115                                   | <i>R</i> <sub>1</sub> = 0.0526, <i>wR</i> <sub>2</sub> = 0.1399                 | <i>R</i> <sub>1</sub> = 0.0804, <i>wR</i> <sub>2</sub> = 0.1596                   | <i>R</i> <sub>1</sub> = 0.0783, <i>wR</i> <sub>2</sub> = 0.1909                   | <i>R</i> <sub>1</sub> = 0.0705, <i>wR</i> <sub>2</sub> = 0.2059                               | <i>R</i> <sub>1</sub> = 0.0435, <i>wR</i> <sub>2</sub> = 0.1078                 |
| Final <i>R</i> indexes [all data]                            | <i>R</i> <sub>1</sub> = 0.1577, <i>wR</i> <sub>2</sub> = 0.3502                                | <i>R</i> <sub>1</sub> = 0.1264, <i>wR</i> <sub>2</sub> = 0.2296                                   | <i>R</i> <sub>1</sub> = 0.0797, <i>wR</i> <sub>2</sub> = 0.1593                 | <i>R</i> <sub>1</sub> = 0.1383, <i>wR</i> <sub>2</sub> = 0.1952                   | <i>R</i> <sub>1</sub> = 0.0992, <i>wR</i> <sub>2</sub> = 0.2041                   | <i>R</i> <sub>1</sub> = 0.0841, <i>wR</i> <sub>2</sub> = 0.22202                              | <i>R</i> <sub>1</sub> = 0.0464, <i>wR</i> <sub>2</sub> = 0.1098                 |
| Largest diff. peak/hole / e Å <sup>-3</sup>                  | 1.29/-2.20                                                                                     | 1.50/-0.92                                                                                        | 0.25/-0.28                                                                      | 1.03/-1.15                                                                        | 0.60/-0.65                                                                        | 0.97/-1.17                                                                                    | 0.30/-0.42                                                                      |

**Table S2. Hydrogen Bonds for Fe-H1**

| D    | H    | A                 | d(D-H)/Å | d(H-A)/Å | d(D-A)/Å  | D-H-A/° |
|------|------|-------------------|----------|----------|-----------|---------|
| C1V  | H1V  | O18A              | 0.95     | 2.63     | 3.35(2)   | 133.6   |
| O1   | H1B  | O31B <sup>1</sup> | 0.84     | 2.46     | 3.064(7)  | 129.5   |
| O2S  | H2SA | O18B <sup>2</sup> | 0.82     | 2.52     | 3.099(10) | 128.6   |
| O2S  | H2SA | O19B <sup>2</sup> | 0.82     | 2.43     | 3.250(10) | 178.6   |
| O2S  | H2SB | O17A              | 0.90     | 2.33     | 2.881(9)  | 119.6   |
| O2S  | H2SB | O30C              | 0.90     | 2.50     | 3.394(10) | 171.7   |
| C11A | H11A | O8A               | 0.95     | 2.42     | 2.970(12) | 116.9   |
| C24A | H24A | O21A              | 0.95     | 2.33     | 2.902(11) | 118.0   |
| N9B  | H9B  | O16B              | 0.88     | 2.10     | 2.535(8)  | 110.0   |
| C11B | H11B | O8B               | 0.95     | 2.35     | 2.911(12) | 117.2   |
| C11B | H11B | O1K               | 0.95     | 2.58     | 3.49(3)   | 159.7   |
| C24B | H24B | O21B              | 0.95     | 2.40     | 2.922(10) | 114.3   |
| C11C | H11C | O8C               | 0.95     | 2.32     | 2.896(11) | 118.6   |
| C24C | H24C | O21C              | 0.95     | 2.27     | 2.881(10) | 120.9   |
| C2D  | H2D  | O32A              | 0.95     | 2.47     | 3.192(9)  | 133.0   |
| C5D  | H5DC | O29A <sup>3</sup> | 0.98     | 2.50     | 3.367(11) | 147.9   |
| C2F  | H2F  | O31B <sup>1</sup> | 0.95     | 2.39     | 3.161(9)  | 138.0   |
| C5F  | H5FC | O29B <sup>4</sup> | 0.98     | 2.59     | 3.500(10) | 155.4   |
| O1T  | H1TA | O19C <sup>2</sup> | 0.92     | 2.14     | 3.061(14) | 175.7   |
| O2T  | H2TA | O1R               | 0.78     | 2.23     | 2.925(12) | 149.7   |
| O2T  | H2TB | O21B <sup>3</sup> | 0.89     | 2.01     | 2.908(9)  | 178.8   |
| C4V  | H4VA | O8C <sup>5</sup>  | 0.98     | 2.46     | 3.37(2)   | 154.1   |
| C4V  | H4VC | O21B <sup>6</sup> | 0.98     | 2.39     | 3.34(2)   | 163.1   |
| C4L  | H4LB | O1T <sup>7</sup>  | 0.98     | 2.61     | 3.48(3)   | 147.3   |
| C3L  | H3LA | O1I <sup>8</sup>  | 0.98     | 2.39     | 3.37(5)   | 174.4   |
| C3L  | H3LB | O2S <sup>7</sup>  | 0.98     | 2.39     | 3.29(4)   | 152.3   |
| C5U  | H5U1 | O21C <sup>8</sup> | 0.98     | 2.09     | 3.02(10)  | 157.4   |
| C5I  | H5I1 | O1I               | 0.98     | 2.01     | 2.52(3)   | 110.3   |
| C5I  | H5I2 | O21C <sup>8</sup> | 0.98     | 2.32     | 3.28(3)   | 166.2   |

Symmetry codes: (1) 1+X,+Y,+Z;(2) -1+X,+Y,+Z; (3)+X,1/2-Y,1/2+Z; (4) 1+X,1/2-Y,-1/2+Z; (5) 1-X,1-Y,-Z; (6) 1-X,1/2+Y,1/2-Z; (7) 1-X,1-Y,1-Z; (8) 2-X,1-Y,1-Z

**Table S3. Hydrogen Bonds for Fe-H2.**

| D    | H    | A                 | d(D-H)/Å | d(H-A)/Å | d(D-A)/Å  | D-H-A/° |
|------|------|-------------------|----------|----------|-----------|---------|
| O12  | H04R | O31C <sup>1</sup> | 0.87     | 1.88     | 2.722(5)  | 161.4   |
| N9A  | H9A  | O16A              | 0.88     | 2.14     | 2.578(4)  | 110.2   |
| C11A | H11A | O8A               | 0.95     | 2.32     | 2.905(6)  | 119.0   |
| N22A | H22A | O29A              | 0.88     | 2.11     | 2.550(4)  | 110.5   |
| C24A | H24A | O21A              | 0.95     | 2.33     | 2.915(6)  | 119.4   |
| N9B  | H9B  | O16B              | 0.78(5)  | 2.11(5)  | 2.530(4)  | 114(4)  |
| C11B | H11B | O8B               | 0.95     | 2.45     | 3.006(5)  | 117.0   |
| C24B | H24B | O21B              | 0.95     | 2.32     | 2.907(6)  | 119.5   |
| C11C | H11C | O8C               | 0.95     | 2.30     | 2.896(5)  | 120.2   |
| C24C | H24C | O21C              | 0.95     | 2.24     | 2.849(6)  | 120.8   |
| C7D  | H7DB | O18A              | 0.99     | 2.30     | 3.196(9)  | 150.6   |
| C10D | H10A | O18C <sup>2</sup> | 0.99     | 2.53     | 3.523(6)  | 178.3   |
| C2E  | H2EA | O8C <sup>3</sup>  | 0.99     | 2.45     | 3.335(6)  | 148.8   |
| C2E  | H2EB | O8B <sup>3</sup>  | 0.99     | 2.41     | 3.274(6)  | 146.0   |
| C10E | H10C | O32B              | 0.99     | 2.51     | 3.392(6)  | 148.7   |
| C10E | H10D | O18B <sup>1</sup> | 0.99     | 2.64     | 3.533(6)  | 149.7   |
| C14E | H14C | O8B <sup>3</sup>  | 0.99     | 2.45     | 3.328(5)  | 147.0   |
| C14E | H14D | O8C <sup>3</sup>  | 0.99     | 2.48     | 3.347(6)  | 145.9   |
| C6F  | H6F1 | O4T               | 0.99     | 2.34     | 3.313(8)  | 169.2   |
| C6F  | H6F2 | O31C <sup>1</sup> | 0.99     | 2.59     | 3.510(9)  | 154.3   |
| C11F | H11H | O32B              | 0.99     | 2.49     | 3.298(7)  | 138.1   |
| O5T  | H1A  | O18B              | 0.94     | 1.92     | 2.817(4)  | 158.2   |
| O5T  | H1A  | O19B              | 0.94     | 2.65     | 3.119(4)  | 111.1   |
| O5T  | H1   | O18C <sup>2</sup> | 0.94     | 1.79     | 2.704(4)  | 162.5   |
| O5T  | H1   | O19C <sup>2</sup> | 0.94     | 2.47     | 3.165(4)  | 130.2   |
| O4T  | H4TB | O32B              | 0.92     | 1.88     | 2.745(5)  | 155.6   |
| C5P  | H5PA | O21A              | 0.99     | 2.52     | 3.328(15) | 139.0   |
| C5P  | H5PB | O21C              | 0.99     | 2.34     | 3.248(14) | 152.5   |
| C10P | H10G | O21C              | 0.99     | 2.26     | 3.22(4)   | 164.2   |
| C13P | H13M | O21C              | 0.99     | 2.62     | 3.491(13) | 146.3   |
| C13P | H13N | O21A              | 0.99     | 2.57     | 3.318(15) | 132.4   |
| C14P | H14G | O31C <sup>4</sup> | 0.99     | 2.55     | 3.420(14) | 145.9   |
| C1G  | H1GA | O21A              | 0.99     | 2.50     | 3.349(18) | 144.0   |
| C1G  | H1GB | O21C              | 0.99     | 2.49     | 3.325(17) | 141.9   |

|      |      |                   |      |      |           |       |
|------|------|-------------------|------|------|-----------|-------|
| C2G  | H2GA | O31C <sup>4</sup> | 0.99 | 2.46 | 3.44(2)   | 169.6 |
| C5G  | H5GA | O32C <sup>4</sup> | 0.99 | 2.53 | 3.37(2)   | 142.0 |
| C9G  | H9GA | O21A              | 0.99 | 2.33 | 3.150(19) | 139.6 |
| C9G  | H9GB | O21C              | 0.99 | 2.45 | 3.34(2)   | 149.3 |
| C13G | H13P | O3T <sup>4</sup>  | 0.99 | 2.51 | 3.17(2)   | 124.1 |

Symmetry codes: (1) 1/2+X,3/2-Y,-1/2+Z; (2) -1/2+X,3/2-Y,1/2+Z; (3) 3/2-X,-1/2+Y,1/2-Z; (4) 1/2-X,1/2+Y,1/2-Z

**Table 6 Hydrogen Bonds for r3.**

| D    | H    | A                 | d(D-H)/Å | d(H-A)/Å | d(D-A)/Å  | D-H-A/° |
|------|------|-------------------|----------|----------|-----------|---------|
| O12  | H04R | O31C <sup>1</sup> | 0.87     | 1.88     | 2.722(5)  | 161.4   |
| N9A  | H9A  | O16A              | 0.88     | 2.14     | 2.578(4)  | 110.2   |
| C11A | H11A | O8A               | 0.95     | 2.32     | 2.905(6)  | 119.0   |
| N22A | H22A | O29A              | 0.88     | 2.11     | 2.550(4)  | 110.5   |
| C24A | H24A | O21A              | 0.95     | 2.33     | 2.915(6)  | 119.4   |
| N9B  | H9B  | O16B              | 0.78(5)  | 2.11(5)  | 2.530(4)  | 114(4)  |
| C11B | H11B | O8B               | 0.95     | 2.45     | 3.006(5)  | 117.0   |
| C24B | H24B | O21B              | 0.95     | 2.32     | 2.907(6)  | 119.5   |
| C11C | H11C | O8C               | 0.95     | 2.30     | 2.896(5)  | 120.2   |
| C24C | H24C | O21C              | 0.95     | 2.24     | 2.849(6)  | 120.8   |
| C7D  | H7DB | O18A              | 0.99     | 2.30     | 3.196(9)  | 150.6   |
| C10D | H10A | O18C <sup>2</sup> | 0.99     | 2.53     | 3.523(6)  | 178.3   |
| C2E  | H2EA | O8C <sup>3</sup>  | 0.99     | 2.45     | 3.335(6)  | 148.8   |
| C2E  | H2EB | O8B <sup>3</sup>  | 0.99     | 2.41     | 3.274(6)  | 146.0   |
| C10E | H10C | O32B              | 0.99     | 2.51     | 3.392(6)  | 148.7   |
| C10E | H10D | O18B <sup>1</sup> | 0.99     | 2.64     | 3.533(6)  | 149.7   |
| C14E | H14C | O8B <sup>3</sup>  | 0.99     | 2.45     | 3.328(5)  | 147.0   |
| C14E | H14D | O8C <sup>3</sup>  | 0.99     | 2.48     | 3.347(6)  | 145.9   |
| C6F  | H6F1 | O4T               | 0.99     | 2.34     | 3.313(8)  | 169.2   |
| C6F  | H6F2 | O31C <sup>1</sup> | 0.99     | 2.59     | 3.510(9)  | 154.3   |
| C11F | H11H | O32B              | 0.99     | 2.49     | 3.298(7)  | 138.1   |
| O5T  | H1A  | O18B              | 0.94     | 1.92     | 2.817(4)  | 158.2   |
| O5T  | H1A  | O19B              | 0.94     | 2.65     | 3.119(4)  | 111.1   |
| O5T  | H1   | O18C <sup>2</sup> | 0.94     | 1.79     | 2.704(4)  | 162.5   |
| O5T  | H1   | O19C <sup>2</sup> | 0.94     | 2.47     | 3.165(4)  | 130.2   |
| O4T  | H4TB | O32B              | 0.92     | 1.88     | 2.745(5)  | 155.6   |
| C5P  | H5PA | O21A              | 0.99     | 2.52     | 3.328(15) | 139.0   |
| C5P  | H5PB | O21C              | 0.99     | 2.34     | 3.248(14) | 152.5   |
| C10P | H10G | O21C              | 0.99     | 2.26     | 3.22(4)   | 164.2   |
| C13P | H13M | O21C              | 0.99     | 2.62     | 3.491(13) | 146.3   |
| C13P | H13N | O21A              | 0.99     | 2.57     | 3.318(15) | 132.4   |
| C14P | H14G | O31C <sup>4</sup> | 0.99     | 2.55     | 3.420(14) | 145.9   |
| C1G  | H1GA | O21A              | 0.99     | 2.50     | 3.349(18) | 144.0   |
| C1G  | H1GB | O21C              | 0.99     | 2.49     | 3.325(17) | 141.9   |
| C2G  | H2GA | O31C <sup>4</sup> | 0.99     | 2.46     | 3.44(2)   | 169.6   |
| C5G  | H5GA | O32C <sup>4</sup> | 0.99     | 2.53     | 3.37(2)   | 142.0   |
| C9G  | H9GA | O21A              | 0.99     | 2.33     | 3.150(19) | 139.6   |

|      |      |                  |      |      |         |       |
|------|------|------------------|------|------|---------|-------|
| C9G  | H9GB | O21C             | 0.99 | 2.45 | 3.34(2) | 149.3 |
| C13G | H13P | O3T <sup>4</sup> | 0.99 | 2.51 | 3.17(2) | 124.1 |

**Table S4. Hydrogen Bonds for Fe-H3.**

| D   | H    | A                 | d(D-H)/Å | d(H-A)/Å | d(D-A)/Å  | D-H-A/° |
|-----|------|-------------------|----------|----------|-----------|---------|
| N7A | H7A  | O13A              | 0.88     | 2.11     | 2.553(6)  | 110.7   |
| N18 | H18  | O25               | 0.88     | 2.13     | 2.577(5)  | 111.1   |
| N2B | H2B  | O28 <sup>1</sup>  | 1.00     | 1.76     | 2.687(7)  | 151.7   |
| N2B | H2B  | O27 <sup>1</sup>  | 1.00     | 2.28     | 3.099(8)  | 138.7   |
| N5B | H5B  | O14A <sup>2</sup> | 1.00     | 2.28     | 3.000(6)  | 127.9   |
| N5B | H5B  | O16A <sup>2</sup> | 1.00     | 1.73     | 2.719(7)  | 167.7   |
| C5A | H5A  | O8A               | 0.95     | 2.36     | 2.938(8)  | 118.6   |
| C20 | H20  | O17               | 0.95     | 2.34     | 2.930(9)  | 119.6   |
| C7B | H7BC | O17 <sup>3</sup>  | 0.98     | 2.54     | 3.458(12) | 156.4   |
| C6B | H6BC | O8A <sup>3</sup>  | 0.98     | 2.49     | 3.161(11) | 125.1   |
| C1B | H1BC | O5D               | 0.98     | 2.53     | 3.370(18) | 143.3   |
| C4B | H4BA | O27 <sup>1</sup>  | 0.99     | 2.65     | 3.411(9)  | 133.8   |
| C4B | H4BB | O5D               | 0.99     | 2.35     | 3.332(12) | 169.8   |
| C5  | H5   | O9                | 0.95     | 2.24     | 2.859(10) | 122.0   |
| C8B | H8B1 | O17               | 0.98     | 2.52     | 3.500(12) | 175.1   |
| C8B | H8B2 | O30 <sup>4</sup>  | 0.98     | 2.64     | 3.622(14) | 175.1   |

Symmetry codes: (1) 1/2-X,-1/2+Y,-1/2+Z; (2) -1/2+X,1/2-Y,-1/2+Z; (3) +X,+Y,-1+Z; (4) -1/2+X,1/2-Y,1/2+Z

**Table S5. Hydrogen Bonds for Fe-H4A.**

| D    | H    | A                 | d(D-H)/Å | d(H-A)/Å | d(D-A)/Å | D-H-A/° |
|------|------|-------------------|----------|----------|----------|---------|
| O2W  | H2WA | O16C <sup>1</sup> | 0.85     | 2.34     | 3.069(6) | 144.4   |
| O2W  | H2WB | O3W               | 0.85     | 1.94     | 2.758(6) | 161.8   |
| O3W  | H3WA | O29C <sup>2</sup> | 0.85     | 2.18     | 2.855(6) | 136.7   |
| O3W  | H3WB | O19A <sup>1</sup> | 0.85     | 2.16     | 2.908(6) | 147.4   |
| O6W  | H6WA | O19A <sup>3</sup> | 0.85     | 1.99     | 2.806(6) | 161.0   |
| O6W  | H6WB | O32B              | 0.85     | 1.95     | 2.795(6) | 177.4   |
| C11A | H11A | O8A               | 0.95     | 2.46     | 2.991(8) | 115.5   |
| C11A | H11A | N2E <sup>4</sup>  | 0.95     | 2.68     | 3.416(8) | 134.6   |
| C24A | H24A | O21A              | 0.95     | 2.37     | 2.908(7) | 115.8   |
| N9B  | H9B  | O16B              | 0.88     | 2.04     | 2.505(6) | 112.1   |
| C15B | H15B | O8B               | 0.95     | 2.42     | 2.985(7) | 117.5   |
| C28B | H28B | O21B              | 0.95     | 2.40     | 2.929(7) | 115.2   |
| C15C | H15C | O8C               | 0.95     | 2.22     | 2.836(7) | 121.4   |
| O1W  | H1WA | O19B <sup>5</sup> | 0.85     | 2.44     | 3.089(6) | 133.2   |
| O1W  | H1WA | O32C <sup>6</sup> | 0.85     | 2.52     | 3.136(6) | 130.5   |

|      |      |                    |      |      |           |       |
|------|------|--------------------|------|------|-----------|-------|
| O1W  | H1WB | O19B               | 0.85 | 1.95 | 2.787(6)  | 169.3 |
| C28C | H28C | O21C               | 0.95 | 2.26 | 2.866(7)  | 121.0 |
| N2D  | H2DA | O18C <sup>7</sup>  | 0.88 | 2.55 | 3.323(6)  | 146.9 |
| N2D  | H2DA | O19C <sup>7</sup>  | 0.88 | 2.25 | 3.054(7)  | 152.6 |
| N2D  | H2DB | O1W <sup>7</sup>   | 0.88 | 2.50 | 3.206(7)  | 137.2 |
| N3D  | H3DA | O32B               | 0.88 | 2.04 | 2.904(7)  | 166.1 |
| N3D  | H3DB | O19C <sup>7</sup>  | 0.88 | 2.41 | 3.182(7)  | 146.2 |
| N4D  | H4DA | O31B               | 0.88 | 2.04 | 2.920(6)  | 176.9 |
| N4D  | H4DB | O1W <sup>7</sup>   | 0.88 | 2.55 | 3.245(7)  | 136.3 |
| N4D  | H4DB | O32C               | 0.88 | 2.42 | 3.152(7)  | 141.0 |
| N2E  | H2EA | O8B <sup>1</sup>   | 0.88 | 2.42 | 3.140(6)  | 139.1 |
| N2E  | H2EB | O8C                | 0.88 | 2.01 | 2.802(6)  | 149.5 |
| N3E  | H3EA | O8B <sup>1</sup>   | 0.88 | 2.01 | 2.833(6)  | 155.5 |
| N3E  | H3EB | O21A <sup>8</sup>  | 0.88 | 2.04 | 2.867(6)  | 156.4 |
| N4E  | H4EA | O21A <sup>8</sup>  | 0.88 | 2.38 | 3.117(6)  | 141.6 |
| N4E  | H4EB | O8C                | 0.88 | 2.16 | 2.915(6)  | 142.9 |
| N4E  | H4EB | O21C <sup>4</sup>  | 0.88 | 2.32 | 2.800(6)  | 114.0 |
| N2F  | H2FA | O31A               | 0.81 | 2.24 | 3.020(7)  | 161.5 |
| N2F  | H2FB | O6W                | 0.81 | 2.22 | 2.896(7)  | 141.4 |
| N3F  | H3FA | O19B <sup>3</sup>  | 0.88 | 2.11 | 2.982(6)  | 169.2 |
| N3F  | H3FB | O32A               | 0.88 | 2.14 | 2.948(7)  | 153.0 |
| N4F  | H4FA | O18B <sup>3</sup>  | 0.88 | 2.30 | 3.026(6)  | 139.2 |
| N4F  | H4FB | N2BB               | 0.88 | 2.58 | 3.33(2)   | 143.9 |
| N2G  | H2GA | O2W                | 0.88 | 1.97 | 2.852(8)  | 174.3 |
| N3G  | H3GA | O1W <sup>3</sup>   | 0.88 | 2.10 | 2.934(7)  | 158.4 |
| N3G  | H3GB | O3W                | 0.88 | 2.09 | 2.939(7)  | 162.1 |
| N4G  | H4GA | O1W <sup>3</sup>   | 0.88 | 2.46 | 3.200(7)  | 142.5 |
| N4G  | H4GB | O32A               | 0.88 | 2.05 | 2.846(6)  | 149.7 |
| N2H  | H2HA | O18A <sup>9</sup>  | 0.88 | 2.21 | 2.997(6)  | 148.2 |
| N2H  | H2HB | O7W <sup>10</sup>  | 0.88 | 2.23 | 2.986(7)  | 144.1 |
| N3H  | H3HA | O18A <sup>9</sup>  | 0.88 | 2.66 | 3.340(6)  | 135.2 |
| N3H  | H3HA | O19A <sup>9</sup>  | 0.88 | 2.09 | 2.938(7)  | 162.9 |
| N3H  | H3HB | O19C               | 0.88 | 2.01 | 2.865(6)  | 163.1 |
| N4H  | H4HA | O7W <sup>10</sup>  | 0.91 | 2.14 | 2.933(7)  | 145.1 |
| N4H  | H4HB | O18C               | 0.91 | 2.11 | 2.978(6)  | 159.0 |
| N2AA | H2A2 | O5W                | 0.88 | 1.90 | 2.769(13) | 169.0 |
| N3AA | H3AA | O31A <sup>11</sup> | 0.88 | 2.58 | 3.280(10) | 137.0 |
| N3AA | H3AA | O31C <sup>11</sup> | 0.88 | 2.12 | 2.925(9)  | 151.9 |
| N3AA | H3AB | O4W                | 0.88 | 2.35 | 3.18(3)   | 157.9 |
| N4AA | H4AB | O29A <sup>11</sup> | 0.88 | 2.13 | 2.857(9)  | 139.8 |
| N3BB | H3BA | O31A <sup>11</sup> | 0.88 | 2.49 | 3.22(4)   | 141.2 |
| N3BB | H3BA | O31C <sup>11</sup> | 0.88 | 2.17 | 2.91(4)   | 141.9 |

|      |      |                    |      |      |          |       |
|------|------|--------------------|------|------|----------|-------|
| N3BB | H3BB | O4X                | 0.88 | 1.90 | 2.74(8)  | 160.3 |
| N4BB | H4BA | O29A <sup>11</sup> | 0.88 | 2.38 | 3.14(3)  | 145.0 |
| N4BB | H4BA | O31C <sup>11</sup> | 0.88 | 2.46 | 3.15(3)  | 135.4 |
| O7W  | H7WA | O32A               | 0.91 | 2.08 | 2.872(6) | 145.5 |
| O7W  | H7WB | O19C <sup>1</sup>  | 0.97 | 2.16 | 2.947(6) | 136.7 |

Symmetry codes: (1) 1-X,1-Y,1-Z; (2) 1+X,+Y,+Z; (3) 1-X,2-Y,-Z; (4) 1+X,+Y,-1+Z; (5) -X,1-Y,1-Z; (6) -X,2-Y,2-Z; (7) +X,+Y,1+Z; (8) +X,+Y,-1+Z; (9) +X,-1+Y,+Z; (10) -X,1-Y,2-Z; (11) -1+X,+Y,1+Z

**Table S6. Hydrogen Bonds for Fe-H4B.**

| D    | H    | A                 | d(D-H)/Å | d(H-A)/Å | d(D-A)/Å  | D-H-A/° |
|------|------|-------------------|----------|----------|-----------|---------|
| O4W  | H4WA | O2W               | 0.90     | 2.39     | 3.294(14) | 179.1   |
| O4W  | H4WB | N4C <sup>1</sup>  | 0.90     | 2.42     | 3.114(13) | 133.9   |
| N9B  | H9B  | O21B <sup>2</sup> | 0.85(5)  | 2.05(5)  | 2.851(5)  | 156(5)  |
| N22B | H22B | O1 <sup>3</sup>   | 1.03     | 2.63     | 3.251(13) | 118.5   |
| N22B | H22B | O29B              | 1.03     | 2.07     | 2.623(4)  | 111.0   |
| N22B | H22B | O2W <sup>3</sup>  | 1.03     | 2.16     | 3.083(8)  | 147.7   |
| O1   | H1A  | O8B               | 0.89     | 2.14     | 2.895(13) | 142.4   |
| O1   | H1B  | O29B <sup>3</sup> | 0.89     | 1.93     | 2.796(13) | 163.9   |
| O1   | H1B  | N3Z               | 0.89     | 2.46     | 2.95(3)   | 115.3   |
| O1   | H1B  | N3Q               | 0.89     | 2.70     | 3.20(3)   | 116.7   |
| C28B | H28B | O21B              | 0.93     | 2.46     | 2.920(6)  | 110.8   |
| N6A  | H6A  | O1                | 0.87(5)  | 2.41(5)  | 3.183(14) | 148(4)  |
| C12A | H12A | O9V               | 0.93     | 2.56     | 3.04(3)   | 112.6   |
| C12A | H12A | O10V <sup>3</sup> | 0.93     | 2.26     | 2.83(4)   | 118.9   |
| N2Z  | H2ZA | O1W <sup>3</sup>  | 0.86     | 2.00     | 2.823(17) | 158.8   |
| N2Z  | H2ZB | O2W <sup>4</sup>  | 0.86     | 1.99     | 2.835(16) | 168.0   |
| O2W  | H2WA | O8B               | 0.99     | 2.12     | 3.019(8)  | 149.9   |
| O2W  | H2WA | O1                | 0.99     | 2.57     | 3.336(16) | 134.2   |
| O2W  | H2WB | O29B <sup>3</sup> | 1.00     | 2.14     | 3.097(7)  | 160.4   |
| N3Z  | H3Z1 | O1W <sup>3</sup>  | 0.86     | 2.56     | 3.24(2)   | 137.2   |
| N3Z  | H3Z2 | O1                | 0.86     | 2.29     | 2.95(3)   | 134.6   |
| N3Z  | H3Z2 | O29B <sup>3</sup> | 0.86     | 2.29     | 2.85(3)   | 123.1   |
| N4Z  | H4Z1 | O13A              | 0.86     | 2.21     | 3.02(3)   | 157.8   |
| N2C  | H2CA | O4W               | 0.86     | 2.20     | 2.889(13) | 136.7   |
| N2C  | H2CA | O16A <sup>5</sup> | 0.86     | 2.30     | 2.983(8)  | 136.2   |
| N2C  | H2CB | O19B <sup>1</sup> | 0.86     | 1.85     | 2.685(8)  | 162.6   |
| N3C  | H3CA | O32B <sup>6</sup> | 0.86     | 2.14     | 2.945(10) | 155.1   |
| N3C  | H3CB | O4W               | 0.86     | 2.26     | 2.946(13) | 137.0   |
| N4C  | H4CA | O32B <sup>6</sup> | 0.86     | 2.41     | 3.141(8)  | 142.7   |
| N4C  | H4CB | O18B <sup>1</sup> | 0.86     | 2.37     | 3.134(8)  | 148.2   |

|     |      |                   |      |      |           |       |
|-----|------|-------------------|------|------|-----------|-------|
| N2D | H2DA | O31B <sup>7</sup> | 0.86 | 2.02 | 2.881(6)  | 176.0 |
| N2D | H2DB | O16A <sup>8</sup> | 0.86 | 2.36 | 3.134(7)  | 150.5 |
| N3D | H3DA | O32B <sup>7</sup> | 0.86 | 2.06 | 2.919(6)  | 172.2 |
| N3D | H3DB | O16A              | 0.86 | 2.09 | 2.935(6)  | 169.7 |
| N4D | H4DA | O15A              | 0.86 | 2.05 | 2.875(6)  | 161.7 |
| O1W | H1WA | O21B              | 0.90 | 2.30 | 3.199(9)  | 179.6 |
| O1W | H1WB | O9V               | 0.90 | 2.05 | 2.94(4)   | 172.8 |
| O1W | H1WB | O10V <sup>3</sup> | 0.90 | 1.86 | 2.75(4)   | 173.0 |
| N2Q | H2QA | O8B <sup>4</sup>  | 0.86 | 2.20 | 2.929(18) | 142.1 |
| N2Q | H2QA | O2W <sup>4</sup>  | 0.86 | 2.13 | 2.762(13) | 129.6 |
| N2Q | H2QB | O1W <sup>3</sup>  | 0.86 | 2.27 | 3.046(15) | 150.7 |
| N3Q | H3Q1 | O1                | 0.86 | 2.53 | 3.20(3)   | 134.9 |
| N3Q | H3Q1 | O29B <sup>3</sup> | 0.86 | 2.21 | 3.01(3)   | 153.3 |
| N3Q | H3Q2 | O1W <sup>3</sup>  | 0.86 | 2.13 | 2.93(3)   | 154.7 |
| N4Q | H4Q2 | O13A              | 0.86 | 2.17 | 2.97(2)   | 154.8 |

Symmetry codes: (1) 1/2-X,1/2-Y,-Z; (2) 1-X,1-Y,1-Z; (3) 1-X,+Y,1/2-Z; (4) +X,1+Y,+Z; (5) +X,1-Y,-1/2+Z; (6) 1-X,-1+Y,1/2-Z; (7) -1/2+X,-1/2+Y,+Z; (8) 1/2-X,-1/2+Y,1/2-Z

**Table S7. Hydrogen Bonds for Cu-H1.**

| D    | H    | A                 | d(D-H)/Å | d(H-A)/Å | d(D-A)/Å | D-H-A/° |
|------|------|-------------------|----------|----------|----------|---------|
| N9B  | H9B  | O16B              | 0.88     | 2.07     | 2.521(4) | 110.9   |
| N22B | H22B | O29B              | 0.88     | 2.08     | 2.535(4) | 111.0   |
| N22A | H22A | O29A              | 0.88     | 2.08     | 2.539(5) | 111.6   |
| C11B | H11B | O8B               | 0.95     | 2.37     | 2.946(5) | 118.6   |
| C24A | H24A | O21A              | 0.95     | 2.40     | 2.968(6) | 118.2   |
| C24B | H24B | O21B              | 0.95     | 2.39     | 2.969(6) | 119.1   |
| C11A | H11A | O8A               | 0.95     | 2.40     | 2.970(5) | 118.4   |
| O1   | H1B  | O19B <sup>1</sup> | 0.95     | 1.91     | 2.803(6) | 154.7   |

Symmetry codes: (1) 1-X,1-Y,1-Z

**Table S8. Hydrogen Bonds for Cu-H2.**

| D   | H    | A                | d(D-H)/Å | d(H-A)/Å | d(D-A)/Å | D-H-A/° |
|-----|------|------------------|----------|----------|----------|---------|
| N11 | H11  | O6               | 0.82(3)  | 2.15(3)  | 2.567(2) | 112(2)  |
| C28 | H28  | O21              | 0.95     | 2.38     | 2.904(3) | 114.4   |
| N2A | H2A1 | O4 <sup>1</sup>  | 0.88     | 2.23     | 3.091(3) | 164.6   |
| N2A | H2A2 | O21 <sup>2</sup> | 0.88     | 2.02     | 2.880(3) | 165.7   |
| N3A | H3A1 | O13 <sup>3</sup> | 0.88     | 2.07     | 2.864(3) | 149.5   |
| N3A | H3A2 | O3 <sup>1</sup>  | 0.88     | 2.14     | 2.999(3) | 165.5   |
| N4A | H4A1 | O13 <sup>3</sup> | 0.88     | 2.19     | 2.951(3) | 144.4   |
| N4A | H4A2 | O1W              | 0.88     | 2.02     | 2.894(4) | 171.9   |
| N2B | H2B1 | O3 <sup>3</sup>  | 0.88     | 2.27     | 3.024(3) | 144.0   |
| N2B | H2B2 | O32              | 0.88     | 2.20     | 2.963(3) | 144.7   |

|     |      |                  |      |      |          |       |
|-----|------|------------------|------|------|----------|-------|
| N3B | H3B1 | O31 <sup>4</sup> | 0.88 | 2.05 | 2.928(2) | 174.7 |
| N3B | H3B1 | O32 <sup>4</sup> | 0.88 | 2.50 | 3.048(3) | 120.8 |
| N3B | H3B2 | O3 <sup>3</sup>  | 0.88 | 2.11 | 2.911(3) | 150.3 |
| N4B | H4B1 | O3 <sup>5</sup>  | 0.88 | 2.64 | 3.159(3) | 119.0 |
| N4B | H4B1 | O4 <sup>5</sup>  | 0.88 | 2.11 | 2.986(2) | 171.1 |
| N4B | H4B2 | O32              | 0.88 | 2.06 | 2.863(3) | 150.8 |
| O4C | H4C  | O6               | 0.89 | 1.94 | 2.834(3) | 179.1 |
| O1W | H1W  | O21              | 0.90 | 1.95 | 2.854(3) | 179.8 |

Symmetry codes: (1) 1-X,1-Y,-Z; ; (2) 1-X,+Y,1/2-Z; (3) 1-X,1+Y,1/2-Z; (4) 3/2-X,1/2+Y,3/2-Z; (5) 1/2+X,1/2+Y,1+Z

## 8. Thermogravimetric analysis

**Table S9. Summary of Theoretical and Experimental Residues**

| Compound                 | Theoretical Residue (%)  | Experimental Residue (%) |
|--------------------------|--------------------------|--------------------------|
| <b>Fe-H1<sup>a</sup></b> | 22.1 (30.9) <sup>b</sup> | 24.3 (29.2) <sup>c</sup> |
| <b>Fe-H2</b>             | 10.3                     | 9.7                      |
| <b>Fe-H3</b>             | 8.3                      | 7.7                      |
| <b>Fe-H4A</b>            | 8.4                      | 8.6                      |
| <b>Fe-H4B</b>            | 8.7                      | 9.2                      |
| <b>Cu-H1</b>             | 28.1                     | 29.3                     |
| <b>Cu-H2</b>             | 11.6                     | 11.3                     |

<sup>a</sup>Material rapidly loses solvent of crystallisation; <sup>b</sup>calculated for material without any included solvent molecules; <sup>c</sup>calculated by scaling the measured final residue (24.3%) by the approximate residue after desolvation (83.3%).

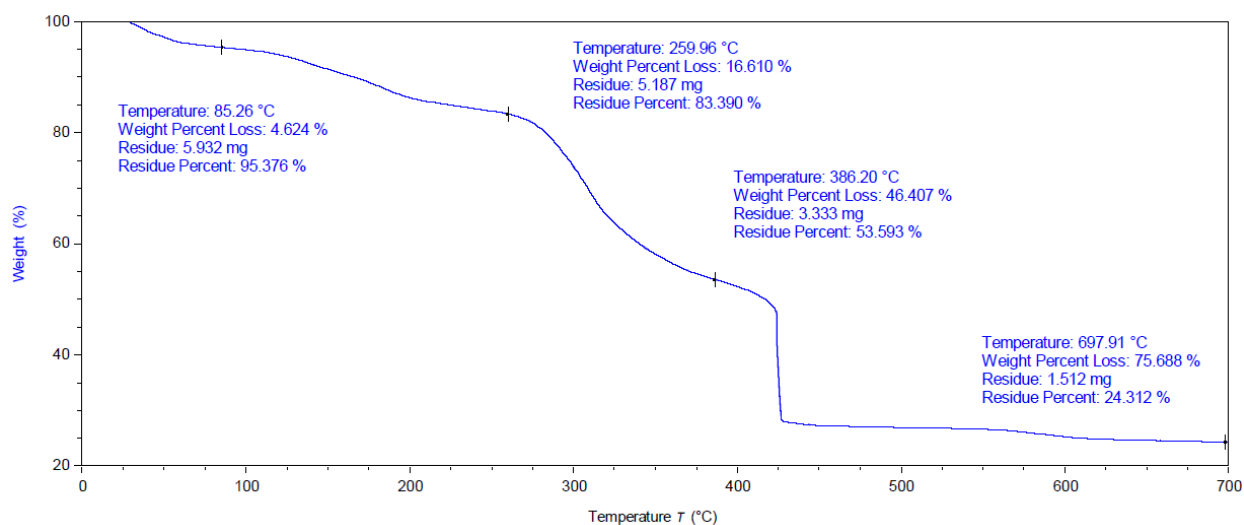

**Figure S38. TGA thermogram of Fe-H1**

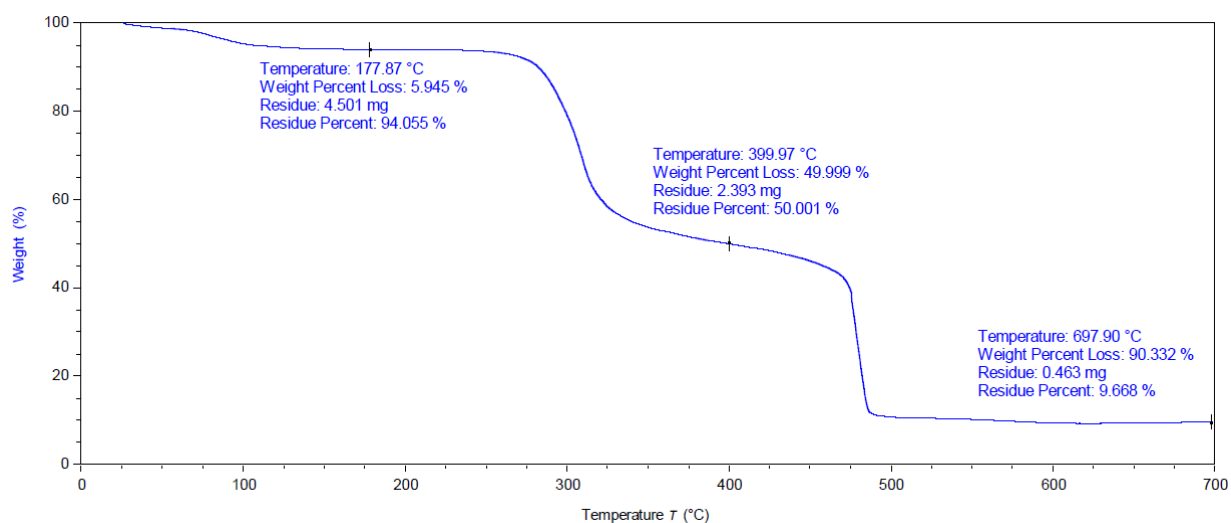

**Figure S39.** TGA thermogram of Fe-H2

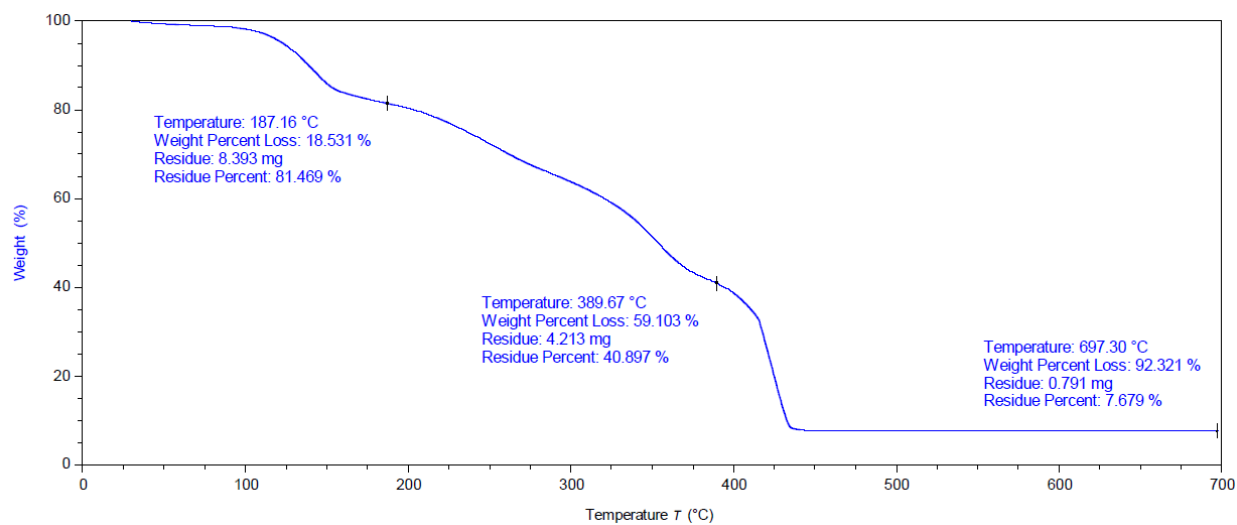

**Figure S40.** TGA thermogram of Fe-H3

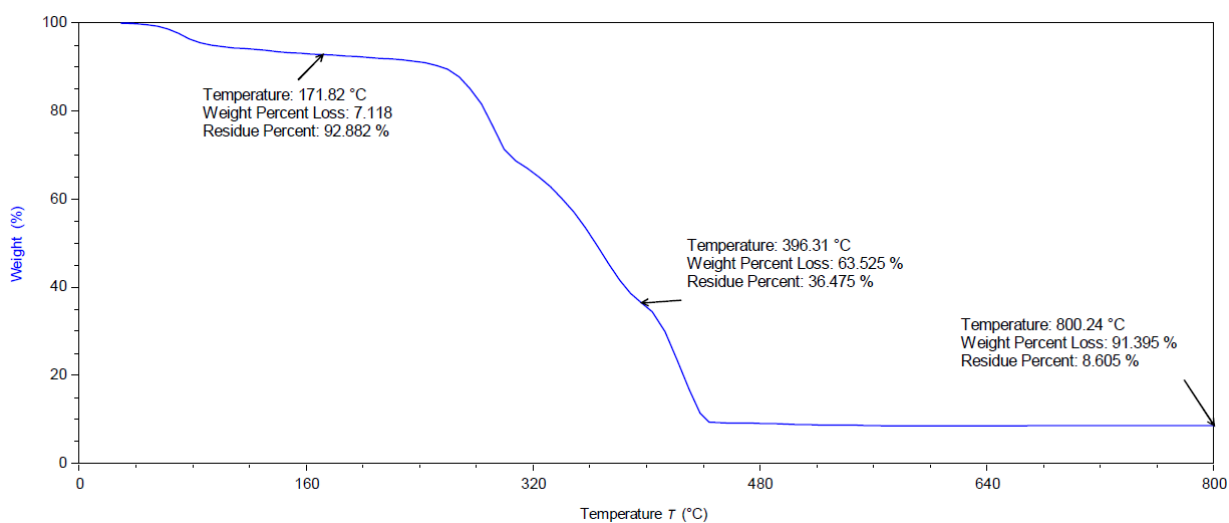

**Figure S41. TGA thermogram of Fe-H4A**

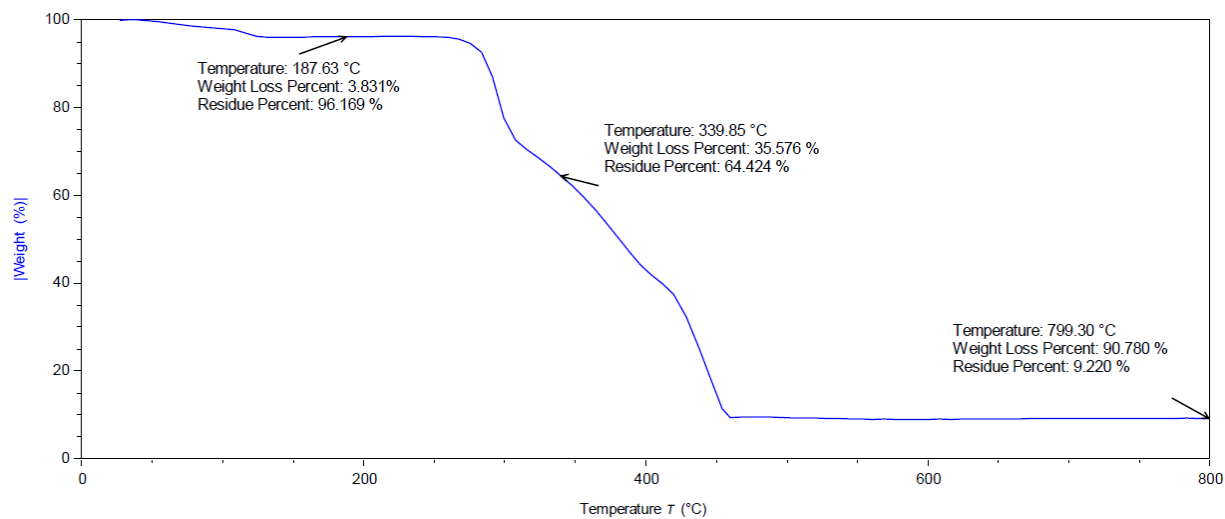

**Figure S42. TGA thermogram of Fe-H4B**

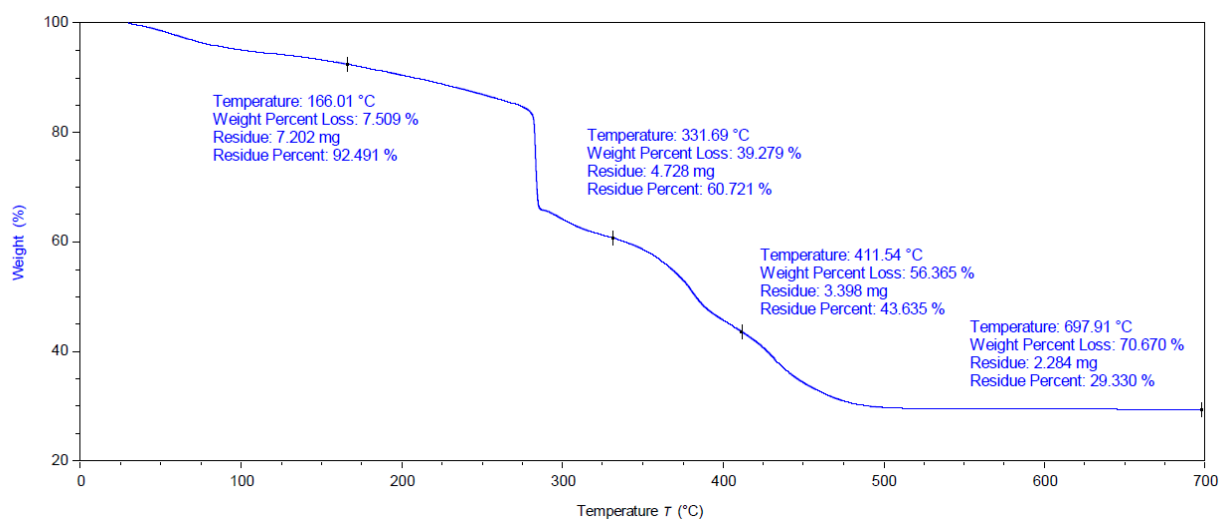

**Figure S43.** TGA thermogram of **Cu-H1**

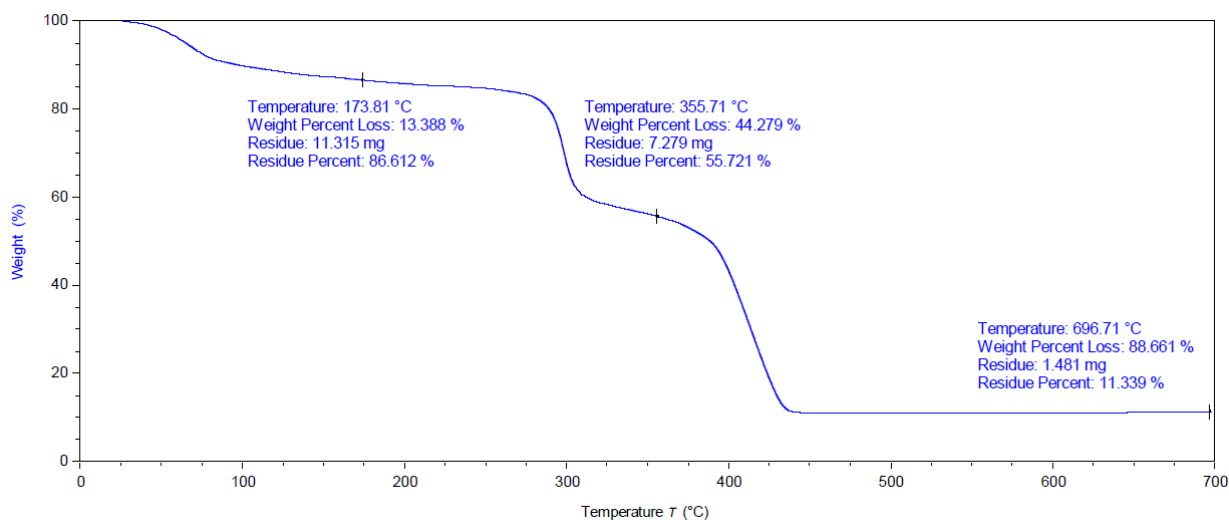

**Figure S44.** TGA thermogram of **Cu-H2**

## 9. References

- [1] G. M. Sheldrick, *Acta Cryst.* 2015, **A71**, 3-8.
- [2] G. M. Sheldrick, *Acta Cryst.* 2015, **C71**, 3-8.
- [3] A. L. Spek, *Acta Cryst.*, 2015, **C71**, 9–18
